# Supplementary material for: Years of Life Lost (YLL) Due to Short-Term Exposure to Ambient Air Pollution in China: A Systematic Review and Meta-Analysis
Source: Int J Environ Res Public Health. 2021 Oct 31;18(21):11467. doi: 10.3390/ijerph182111467 (PMC8582650; doi:10.3390/ijerph182111467)
Supplement: Supplementary file 1 [file ijerph-18-11467-s001.zip › ijerph-1433445-supplementary.pdf]

## **Supplementary Material**

### **Years of life lost (YLL) due to short-term exposure to ambient air pollution in China: a systematic review and meta-analysis**

#### **Table of contents:**

**Part A** Search strategies

**Part B** Standardized method

**Part C** Selection strategies for the used pooled effect models

**Table S1** Criteria for the quality assessment of each study basing on the OHAT and Navigation Guide tool

**Table S2** The summaries of the included studies in the Meta-analysis

Table S3 The results before and after applying the trim and fill method

**Part B** Risk of bias assessment for each of the included studies

**Figure S1** Characteristics of the included studies according to quality assessments, exposure assessment, health outcomes of YLL, adjustment factors, and other characteristics. Colored grid indicated that these results were expressed by the study. High quality: the study was high quality (score=5) according to the methodological quality assessments; Low quality: the study was low quality (score<5) according to the methodological quality assessments. PM<sub>2.5</sub>: particle with aerodynamic diameter  $\leq 2.5\mu\text{m}$ ; PM<sub>10</sub>: particle with aerodynamic diameter  $\leq 2.5\mu\text{m}$ ;

SO<sub>2</sub>: sulfur dioxide; NO<sub>2</sub>: nitrogen dioxide; O<sub>3</sub>: ozone; RD: respiratory disease; CVD: cardiovascular disease; COPD: chronic obstructive pulmonary disease; AMI: acutemyocardialinfarction; IHD: Ischemic Heart Disease; ICD: International Classification of Disease.

**Figure S2** Risk of bias assessment for each study

**Figure S3** Forest plot and pooled effect estimates of the ambient air pollution on the YLL of non-accidental disease

**Figure S4** Forest plot and pooled effect estimates of the ambient air pollution on the YLL of CVD

**Figure S5** Forest plot and pooled effect estimates of the ambient air pollution on the YLL of RD

**Figure S6** Forest plot and pooled effect estimates of the ambient air pollution on the YLL of other diseases

**Figure S7** Forest plot and pooled effect estimates of the ambient air pollution on YLL for non-accidental diseases, cardiovascular disease (CVD) and respiratory disease (RD) stratified by gender

**Figure S8** Forest plot and pooled effect estimates of the ambient air pollution on YLL for non-accidental diseases, cardiovascular disease (CVD) and respiratory disease (RD) stratified by age

**Figure S9** Doi plot and LFK index of the ambient air pollution on the

disease-specific YLL

**Figure S10** Sensitivity analyses of the ambient air pollution on the disease-specific YLL

## Part A Search strategies

We searched Pubmed, web of science, medline, Embase, Wan Fang and CNKI databases for literature published in English or Chinese, up to April 2020, using the following terms for titles and abstracts: (“air pollutant” OR “particulate matter” OR “PM10” OR “PM(10)” OR “PM2.5” OR “PM(2.5)” OR “PM” OR “nitrogen dioxide” OR “NO2” OR “NO(2)” OR “sulfur dioxide” OR “sulphur dioxide” OR “SO2” OR “SO(2)” OR “ozone” OR “O3” OR “O(3)” OR “carbon monoxide” OR “CO”) AND (“years of life lost” OR “YLL” OR “burden of disease” OR “disease burden” OR “burden of death”) AND (“China” OR “Chinese”).

The names of some major Chinese locations were also added in the terms. The names of the major Chinese locations were as following: Anshan, Beijing, Chongqing, Foshan, Fuzhou, Guangzhou, Hangzhou, Hong Kong, Kaohsiung, Lanzhou, Nanjing, Quanzhou, Shanghai, Shenyang, Shenzhen, Suzhou, Taichung, Taipei, Taiyuan, Tangshan, Tianjin, Urumqi, Wuhan, Zhongshan, Zhuhai, Anqing, Beihai, Bengbu, Changchun, Changde, Changsha, Changzhou, Chengdu, Dali, Dalian, Dandong, Ganzhou, Guilin, Guiyang, Haikou, Harbin, Hefei, Hohhot, Hsinchu, Huizhou, Jilin, Jinan, Jinhua, Jining, Jinzhou, Jiujiang, Kunming, Luoyang, Luzhou, Macau, Mudanjiang, Nanchang, Nanchong, Nanning, Ningbo, Pingdingshan, Qinhuangdao, Sanya, Shaoguan, Shijiazhuang, Tainan, Tangshan, Taoyuan, Wenzhou, Wuxi, Xiamen, Xiangyang, Xining, Xi'an, Xuzhou, Yangzhou, Yantai, Yichang, Yinchuan, Yueyang, Zhanjiang, Zunyi, River delta, and Taiwan.

For the Wan Fang and CNKI databases, we both used the Chinese and English names of the above terms for literature searching.

## Part B Standardized method

We standardized the effect estimates with 95%CI that extracted from each study to a 10µg/m<sup>3</sup> change as the increasing unit using the equation as follows:

$$ES_{Standardized} = \frac{ES_{Origin}}{Increment_{Origin}} \times Increment_{Standardized}$$

Where  $ES_{Standardized}$  is the standardized effect estimates;  $ES_{Origin}$  is the original effect estimates that extracted from each study;  $Increment_{Origin}$  is the original increment of air pollution that extracted from each study;  $Increment_{Standardized}$  is the standardized increment of air pollution, in our study, we used 10 µ g/m<sup>3</sup>.

The standard error of each study was calculated according to the effect estimates with 95%CI that extracted from each study to a 10µg/m<sup>3</sup> change as the increasing unit using the equation as follows:

$$SE_{Standardized} = \frac{UCI_{Origin} - ES_{Origin}}{Increment_{Origin} \times 1.96} \times Increment_{Standardized}$$

Where  $SE_{Standardized}$  is the standard error of the standardized effect estimate;  $UCI_{Origin}$  is the upper confidence interval of original effect estimate that extracted from each study..

### **Part C Selection strategies for the used pooled effect models**

We chose the pooled effects model according to the p-values of the  $I^2$ -based Cochran Q test and  $I^2$  metrics. If  $P < 0.05$  or  $I^2 \geq 50\%$ , it indicates that there is a larger heterogeneity between the studies, we chose the random-effects model to calculate the pooled effect estimates. If  $P \geq 0.05$  and  $I^2 < 50\%$ , the fixed-effects models were used to calculate the pooled effect estimates.

**Table S1** Criteria used for the quality assessment of each study, according to the OHAT and Navigation Guide tool<sup>1</sup>

| Bias criteria   |                        | Risk of Bias<br>Question/Domains                                                                                                                                                                                                                                        | Answer                                                                                                                                                                                                                                                                                                                                                                                                                                                                                                                                                                                                                                                                                                                                                                                       |
|-----------------|------------------------|-------------------------------------------------------------------------------------------------------------------------------------------------------------------------------------------------------------------------------------------------------------------------|----------------------------------------------------------------------------------------------------------------------------------------------------------------------------------------------------------------------------------------------------------------------------------------------------------------------------------------------------------------------------------------------------------------------------------------------------------------------------------------------------------------------------------------------------------------------------------------------------------------------------------------------------------------------------------------------------------------------------------------------------------------------------------------------|
| Key<br>criteria | Exposure<br>assessment | <p>Includes measurement error or measurement limitations.</p> <p>List of major considerations:</p> <p>1) air pollution measurements were performed daily,</p> <p>2) &lt; 25% missing data,</p> <p>3) more than one monitoring station per a large geographical area</p> | <p>-LOW risk: There is high confidence that the exposure to PM and its constituents is the true average population exposure.</p> <p>-PROBABLY LOW: There is indirect evidence that suggests low risk of bias, or one of the three listed considerations is not applied.</p> <p>-PROBABLY HIGH risk: There is insufficient information to permit a judgment of high risk of bias, but there is indirect evidence that suggests t high risk of bias. Additionally, two out of the three listed considerations are not applied.</p> <p>-HIGH risk: There is direct evidence of high risk of misclassification bias, or all three of the listed considerations are not applied.</p> <p>-NOT APPLICABLE: exposure assessment methods of study are not expected to introduce bias in the study</p> |
|                 | Outcome                | Outcome assessment                                                                                                                                                                                                                                                      | -LOW risk: mortality cause classified based on diagnosis standard criteria (International Classification System – ICD code) and provided                                                                                                                                                                                                                                                                                                                                                                                                                                                                                                                                                                                                                                                     |

| Bias criteria |                         | Risk of Bias Question/Domains                                                                                                                | Answer                                                                                                                                                                                                                                                                                                                                                                                                                                                                         |
|---------------|-------------------------|----------------------------------------------------------------------------------------------------------------------------------------------|--------------------------------------------------------------------------------------------------------------------------------------------------------------------------------------------------------------------------------------------------------------------------------------------------------------------------------------------------------------------------------------------------------------------------------------------------------------------------------|
|               | <b>assessment</b>       | methods lack accuracy                                                                                                                        | <p>by a National or Regional Database.</p> <p>-PROBABLY LOW: outcome was assessed based on diagnosis standard criteria and collected by researcher</p> <p>-PROBABLY HIGH risk: outcome was not assessed based on standard diagnosis criteria AND is accompanied by validation sub-study or sensitivity analysis to suggest that the risk is minimum.</p> <p>-HIGH risk: Outcome was assessed based on self-reports (parents, family) and data collected by the researcher.</p> |
|               | <b>Confounding bias</b> | Study appropriately accounted for all important well studied potential confounders (long-term trends, seasonality, day of week, temperature, | <p>-LOW risk: study accounted for all important confounders which were measured consistently</p> <p>-PROBABLY LOW: study accounted for most of confounders AND is not expected to introduce bias</p>                                                                                                                                                                                                                                                                           |

| Bias criteria  |                | Risk of Bias Question/Domains                                                                                                                                                                                      | Answer                                                                                                                                                                                                                                                                                                                                                                                                                                                                                                      |
|----------------|----------------|--------------------------------------------------------------------------------------------------------------------------------------------------------------------------------------------------------------------|-------------------------------------------------------------------------------------------------------------------------------------------------------------------------------------------------------------------------------------------------------------------------------------------------------------------------------------------------------------------------------------------------------------------------------------------------------------------------------------------------------------|
|                |                | relative humidity)                                                                                                                                                                                                 | <p>-PROBABLY HIGH risk: study accounted for some but not all of confounders AND is expected to introduce bias</p> <p>-HIGH risk: study did not account for potential confounders OR were inappropriately measured</p> <p>-NOT APPLICABLE: assessment of outcome cannot introduce bias in the study</p>                                                                                                                                                                                                      |
| Other criteria | Selection bias | Does the selection of participants into the study was done in a manner that might introduce bias in the study? e.g. study only certain days (for examples, only Fridays), and not all days, seasons were included. | <p>-LOW risk: The descriptions of the studied population were sufficiently detailed to support the assertion that risk of selection effects was minimal.</p> <p>-PROBABLY LOW risk: There is insufficient information about population selection to permit a judgment of low risk of bias, but there is indirect evidence that suggests low risk of bias.</p> <p>-PROBABLY HIGH risk: There is insufficient information about population selection to permit a judgment of high risk of bias, but there</p> |

| Bias criteria |                                | Risk of Bias<br>Question/Domains          | Answer                                                                                                                                                                                                                                                                                                                                                                                                       |
|---------------|--------------------------------|-------------------------------------------|--------------------------------------------------------------------------------------------------------------------------------------------------------------------------------------------------------------------------------------------------------------------------------------------------------------------------------------------------------------------------------------------------------------|
|               |                                |                                           | <p>is indirect evidence that suggests high risk of bias.</p> <p>- HIGH risk: There were indications from descriptions of the studied population of high risk of bias.</p> <p>- NOT APPLICABLE: There is evidence that selection is not an element of study design capable of introducing risk of bias in the study.</p>                                                                                      |
|               | <b>Incomplete outcome data</b> | Was incomplete data adequately addressed? | <p>-LOW risk: no missing outcome data or missing data is unrelated to true outcome</p> <p>-PROBABLY LOW: there was insufficient information about incomplete data to judge for low risk, but indirect evidence that suggests low risk of bias</p> <p>-PROBABLY HIGH risk: there was insufficient information about incomplete data to judge for high risk, but indirect evidence that suggests high risk</p> |

| Bias criteria |                            | Risk of Bias Question/Domains                | Answer                                                                                                                                                                                                                                                                                                                                                                                                                                                                                                                                            |
|---------------|----------------------------|----------------------------------------------|---------------------------------------------------------------------------------------------------------------------------------------------------------------------------------------------------------------------------------------------------------------------------------------------------------------------------------------------------------------------------------------------------------------------------------------------------------------------------------------------------------------------------------------------------|
|               |                            |                                              | <p>-HIGH risk: missing outcome data is related to true outcome</p> <p>-NOT APPLICABLE: there is evidence that incomplete outcome data is not introducing bias in the study</p>                                                                                                                                                                                                                                                                                                                                                                    |
|               | <b>Selective reporting</b> | Selective reporting of outcomes or analyses. | <p>-LOW risk: all of the studies pre-specified outcomes and findings are reported</p> <p>-PROBABLY LOW: there was insufficient information about selective outcome to judge for low risk, but indirect evidence that suggests study was free of selective report</p> <p>-PROBABLY HIGH risk: there was insufficient information about selective reporting to judge for high risk, but indirect evidence suggests that study was not free of selective reporting</p> <p>-HIGH risk: not all pre-specified outcomes and findings were reported,</p> |

| Bias criteria |                             | Risk of Bias Question/Domains                                   | Answer                                                                                                                                                                                                                                                                                                                                                                                                                              |
|---------------|-----------------------------|-----------------------------------------------------------------|-------------------------------------------------------------------------------------------------------------------------------------------------------------------------------------------------------------------------------------------------------------------------------------------------------------------------------------------------------------------------------------------------------------------------------------|
|               |                             |                                                                 | <p>or one/more of the primary outcomes or analyses were assessed or executed with other methods than the pre-specified one, or one/more of the reported outcomes/findings was/were not pre-specified</p> <p>-NOT APPLICABLE: there is evidence that selective outcome reporting is not introducing bias in the study</p>                                                                                                            |
|               | <b>Conflict of interest</b> | Potential source of bias in reporting through source of funding | <p>-LOW risk: the study did not receive funding from an entity with financial interest in the outcome of study</p> <p>-PROBABLY LOW: there is insufficient information to judge for low risk, but indirect evidence suggests study was free of financial interest</p> <p>-PROBABLY HIGH risk: there is insufficient information to judge for high risk, but indirect evidence suggests study was not free of financial interest</p> |

| Bias criteria |       | Risk of Bias Question/Domains                    | Answer                                                                                                                                                                                                                                                                                                                                                                                                     |
|---------------|-------|--------------------------------------------------|------------------------------------------------------------------------------------------------------------------------------------------------------------------------------------------------------------------------------------------------------------------------------------------------------------------------------------------------------------------------------------------------------------|
|               |       |                                                  | -HIGH risk: study received support from an entity with financial interest in the outcome of study                                                                                                                                                                                                                                                                                                          |
|               | Other | Bias due to other problems not covered elsewhere | <p>-LOW risk: No other sources of bias</p> <p>-PROBABLY LOW: there is insufficient information to judge for low risk, but indirect evidence suggests study was free of other problems</p> <p>-PROBABLY HIGH risk: there is insufficient information to judge for high risk, but indirect evidence suggests study was not free of other problems</p> <p>-HIGH risk: at least one important risk of bias</p> |

1. Achilleos, S.; Kioumourtzoglou, M. A.; Wu, C. D.; Schwartz, J. D.; Koutrakis, P.; Papatheodorou, S. I., Acute effects of fine particulate matter constituents on mortality: A systematic review and meta-regression analysis. *Environ Int* **2017**,109, 89-100.

**Table S2 The summaries of the included studies in the Meta-analysis**

| Study           | Location                     | Study period | Type of study     | studied deaths size | Exposure                                                                 | Source of exposure                                                                                                                                                                                                                                        | Health outcome of YLL  | Diagnosis standard                      | YLL calculate method | Adjustment factors                                                                           | Lag patterns                                                                                                      | Stratified analysis                                        | Main findings                                                                                                                                                                                                                                                                                                                                                                                                                                                                                                                                                                                                                                                                                                                                                                                                            |
|-----------------|------------------------------|--------------|-------------------|---------------------|--------------------------------------------------------------------------|-----------------------------------------------------------------------------------------------------------------------------------------------------------------------------------------------------------------------------------------------------------|------------------------|-----------------------------------------|----------------------|----------------------------------------------------------------------------------------------|-------------------------------------------------------------------------------------------------------------------|------------------------------------------------------------|--------------------------------------------------------------------------------------------------------------------------------------------------------------------------------------------------------------------------------------------------------------------------------------------------------------------------------------------------------------------------------------------------------------------------------------------------------------------------------------------------------------------------------------------------------------------------------------------------------------------------------------------------------------------------------------------------------------------------------------------------------------------------------------------------------------------------|
| Guo et al. 2013 | 8 urban districts in Beijing | 2004-2008    | Time-series study | 80515 deaths        | PM <sub>2.5</sub> , PM <sub>10</sub> , SO <sub>2</sub> , NO <sub>2</sub> | PM <sub>2.5</sub> was monitored at the main campus of Peking University; PM <sub>10</sub> , SO <sub>2</sub> , NO <sub>2</sub> were from eight fixed monitoring sites distributed in different part of the urban area from Beijing municipal environmental | Non-accidental disease | The Beijing death classification system | WHO life tables      | Long-term trends, seasonality, the day of week, temperature, relative humidity, air pressure | 1.Moving average concentration over two days (Lag01) (main analysis);<br>2.Single day lag: lag0, lag1, lag2, lag3 | 1.Gender: female and male;<br>2.Age: ≤65years and >65years | 1. An IQR increase in PM <sub>2.5</sub> (94μg/m <sup>3</sup> ), PM <sub>10</sub> (106μg/m <sup>3</sup> ), SO <sub>2</sub> (49μg/m <sup>3</sup> ) and NO <sub>2</sub> (30μg/m <sup>3</sup> ) in lag01 was related to YLL increases of 15.8 (95%CI:5.3-26.3), 15.8(95%CI:6.1-25.5), 16.2 (95%CI:4.1-28.4) and 15.1(95%CI:4.7-25.6) years.<br>2. An IQR increase in PM <sub>2.5</sub> , PM <sub>10</sub> , SO <sub>2</sub> and NO <sub>2</sub> in lag01 was related to YLL increases of 11.1 (95%CI:4.7-17.5), 9.3(95%CI:3.3-15.2), 5.6(95%CI:-1.9-13.1), 6.7(95%CI:0.3-13.1) years for female and 4.7 (95%CI:-2.9-12.3), 6.5 (95%CI: -0.5-13.5), 10.6 (95%CI:1.8-19.4), 8.4 (95%CI:0.8-16.0) years for male .<br>3. An IQR increase in PM <sub>2.5</sub> , PM <sub>10</sub> , SO <sub>2</sub> and NO <sub>2</sub> in lag01 |

| Study | Location | Study period | Type of study | studied deaths size | Exposure | Source of exposure | Health outcome of YLL | Diagnosis standard | YLL calculate method | Adjustment factors | Lag patterns | Stratified analysis | Main findings                                                                                                                                                                                                                                                       |
|-------|----------|--------------|---------------|---------------------|----------|--------------------|-----------------------|--------------------|----------------------|--------------------|--------------|---------------------|---------------------------------------------------------------------------------------------------------------------------------------------------------------------------------------------------------------------------------------------------------------------|
|       |          |              |               |                     |          | monitoring centre  |                       |                    |                      |                    |              |                     | was related to YLL increases of 12.0 (95%CI:2.9- 21.0), 10.3 (95%CI:2.0-18.6), 10.8 (95%CI:0.3-21.3), 10.1 (95%CI:1.1-19.1) years for the youngers and 3.8 (95%CI:-0.9-8.6), 5.5 (95%CI:1.1-9.9), 5.4 (95%CI:-0.1-10.9), 5.0 (95%CI:0.3-9.8) years for the elders . |

| Study          | Location                     | Study period | Type of study     | studied deaths size | Exposure                                             | Source of exposure                                                                           | Health outcome of YLL  | Diagnosis standard | YLL calculate method               | Adjustment factors                                                                                                       | Lag patterns                                  | Stratified analysis                                        | Main findings                                                                                                                                                                                                                                                                                                                                                                                                                                                                                                                                                                                                                                                                                                                                                                                                                                                                                         |
|----------------|------------------------------|--------------|-------------------|---------------------|------------------------------------------------------|----------------------------------------------------------------------------------------------|------------------------|--------------------|------------------------------------|--------------------------------------------------------------------------------------------------------------------------|-----------------------------------------------|------------------------------------------------------------|-------------------------------------------------------------------------------------------------------------------------------------------------------------------------------------------------------------------------------------------------------------------------------------------------------------------------------------------------------------------------------------------------------------------------------------------------------------------------------------------------------------------------------------------------------------------------------------------------------------------------------------------------------------------------------------------------------------------------------------------------------------------------------------------------------------------------------------------------------------------------------------------------------|
| Lu et al. 2015 | 9 urban districts in Nanjing | 2009-2013    | Time-series study | 147956 deaths       | PM <sub>10</sub> , SO <sub>2</sub> , NO <sub>2</sub> | From 9 state-controlled monitoring stations from the Nanjing environmental monitoring center | Non-accidental disease | ICD 10: A00-R99    | Coale-Demeny West model life table | Long-term trends, seasonal trends, temperature, relative humidity, barometric pressure, day of the week, public holidays | Lag01(main analysis), lag02, lag03; Lag0-lag5 | 1.Gender: female and male;<br>2.Age: ≤75years and >75years | <p>1. An IQR increase in PM<sub>10</sub>(66.3 µg/m<sup>3</sup>),SO<sub>2</sub>(23.3µg/m<sup>3</sup>) and NO<sub>2</sub> (25.3µg/m<sup>3</sup>)in lag01 was related to YLL increases of 20.5 (95%CI: 6.3-34.8), 30.3(95%CI: 12.2-48.4), 34.9 (95%CI:16.9-52.9) years.</p> <p>2. An IQR increase in PM<sub>10</sub>,SO<sub>2</sub> and NO<sub>2</sub> in lag01 was related to YLL increases of5.3 (95%CI:-3.5- 14.0), 10.2(95%CI:-0.9-21.4), 13.5(95%CI: 2.4-24.6) years for female and 15.3 (95%CI:4.7-25.9), 20.1 (95%CI: 6.6-33.5), 21.4 (95%CI:8.0-34.8) years for male .</p> <p>3. An IQR increase in PM<sub>10</sub>,SO<sub>2</sub> and NO<sub>2</sub> in lag01 was related to YLL increases of 11.4 (95%CI:-1.4- 24.1), 19.6 (95%CI:3.5-35.8), 20.0 (95%CI: 3.9-36.1) years for the youngers and 9.2 (95%CI:4.2-14.2), 10.7 (95%CI: 4.3- 17.0), 14.9 (95%CI:8.6-21.2) years for the elders .</p> |

| Study          | Location | Study period | Type of study     | studied deaths size | Exposure                                                                 | Source of exposure                                                                                                     | Health outcome of YLL  | Diagnosis standard | YLL calculate method | Adjustment factors                                                                                   | Lag patterns                      | Stratified analysis                                            | Main findings                                                                                                                                                                                                                                                                                                                                                                                                                                                                                                                                                                                                                                                                                                                                                                                                                                                                    |
|----------------|----------|--------------|-------------------|---------------------|--------------------------------------------------------------------------|------------------------------------------------------------------------------------------------------------------------|------------------------|--------------------|----------------------|------------------------------------------------------------------------------------------------------|-----------------------------------|----------------------------------------------------------------|----------------------------------------------------------------------------------------------------------------------------------------------------------------------------------------------------------------------------------------------------------------------------------------------------------------------------------------------------------------------------------------------------------------------------------------------------------------------------------------------------------------------------------------------------------------------------------------------------------------------------------------------------------------------------------------------------------------------------------------------------------------------------------------------------------------------------------------------------------------------------------|
| He et al. 2016 | Ningbo   | 2009-2013    | Time-series study | 163704 deaths       | PM <sub>2.5</sub> , PM <sub>10</sub> , SO <sub>2</sub> , NO <sub>2</sub> | From 11 monitoring sites that cover all districts and counties of Ningbo, from Environment monitoring center of Ningbo | Non-accidental disease | ICD10              | WHO life tables      | Secular trends, seasonality, temperature, relatively humidity, air pressure, wind speed, day of week | Lag03 (main analysis); lag0-lag06 | 1. Gender: female and male;<br>2. Age: ≤65 years and >65 years | <p>1. A 10µg/m<sup>3</sup> increase in PM<sub>2.5</sub>, PM<sub>10</sub>, SO<sub>2</sub> and NO<sub>2</sub> in lag03 was related to YLL increases of 2.97 (95%CI:-2.01-7.95), 4.27(95%CI: 1.17-7.38), 29.98 (95%CI: 19.21-40.76) and 16.58(95%CI:8.19-24.97) years.</p> <p>2. A 10µg/m<sup>3</sup> increase in PM<sub>2.5</sub>, PM<sub>10</sub>, SO<sub>2</sub> and NO<sub>2</sub> in lag03 was related to YLL increases of 0.71 (95%CI:-2.36- 3.79), 1.94(95%CI:0.02-3.86), 17.19 (95%CI:10.55-23.83), 8.67(95%CI: 3.51-13.85) years for female and 2.26 (95%CI:-1.61-6.13), 2.33 (95%CI: -0.01-4.68), 12.79 (95%CI:4.62-20.97), 7.90 (95%CI:1.57-14.24) years for male .</p> <p>3. A 10µg/m<sup>3</sup> increase in PM<sub>2.5</sub>, PM<sub>10</sub>, SO<sub>2</sub> and NO<sub>2</sub> in lag03 was related to YLL increases of -1.18 (95%CI:-5.34- 2298), 1.32 (95%CI:</p> |

| Study            | Location                               | Study period | Type of study     | studied deaths size | Exposure                                             | Source of exposure                                | Health outcome of YLL                                                          | Diagnosis standard                         | YLL calculate method | Adjustment factors                                                                          | Lag patterns                            | Stratified analysis                                        | Main findings                                                                                                                                                                                                                                                                                                                                                                                                                                                                                                                                                                                                         |
|------------------|----------------------------------------|--------------|-------------------|---------------------|------------------------------------------------------|---------------------------------------------------|--------------------------------------------------------------------------------|--------------------------------------------|----------------------|---------------------------------------------------------------------------------------------|-----------------------------------------|------------------------------------------------------------|-----------------------------------------------------------------------------------------------------------------------------------------------------------------------------------------------------------------------------------------------------------------------------------------------------------------------------------------------------------------------------------------------------------------------------------------------------------------------------------------------------------------------------------------------------------------------------------------------------------------------|
|                  |                                        |              |                   |                     |                                                      |                                                   |                                                                                |                                            |                      |                                                                                             |                                         |                                                            | -1.25-3.88), 14.23 (95%CI:5.31-23.15), 7.33 (95%CI:0.41- 14.25) years for the youngers and 4.15 (95%CI:1.62-6.68), 2.96 (95%CI: 1.40- 4.52), 15.75 (95%CI:10.34-21.16), 9.25 (95%CI:5.04-13.46) years for the elders .                                                                                                                                                                                                                                                                                                                                                                                                |
| Yang et al. 2016 | 6 central urban districts in Guangzhou | 2004-2007    | Time-series study | ——                  | PM <sub>10</sub> , SO <sub>2</sub> , NO <sub>2</sub> | From Guangzhou Bureau of Environmental Protection | Non-accidental disease, cardiovascular disease, ischemic heart disease, stroke | ICD-10: A00-R99, I00-I99, I20-I25, I60-I69 | WHO life tables      | Long-term trends, seasonality, temperature, relative humidity, atmospheric pressure, day of | Lag01 (main analysis), Lag04; Lag0-lag4 | 1.Gender: female and male;<br>2.Age: <75years and ≥75years | 1. For non-accidental diseases, a 10μg/m <sup>3</sup> increase in PM <sub>10</sub> ,SO <sub>2</sub> and NO <sub>2</sub> in lag01 was related to YLL increases of 6.5(95%CI: 3.8-9.1), 4.4 (95%CI: 1.8-7.1) and 5.3(95%CI:2.4-8.1) years. For CVD, a 10μg/m <sup>3</sup> increase in PM <sub>10</sub> ,SO <sub>2</sub> and NO <sub>2</sub> in lag01 was related to YLL increases of 2.8(95%CI: 1.7-3.8), 2.6 (95%CI: 1.2-4.0) and 1.8(95%CI:0.8- 2.9) years.<br><br>2. For non-accidental diseases, a 10μg/m <sup>3</sup> increase inPM <sub>10</sub> ,SO <sub>2</sub> and NO <sub>2</sub> in lag01 was related to YLL |

| Study | Location | Study period | Type of study | studied deaths size | Exposure | Source of exposure | Health outcome of YLL | Diagnosis standard | YLL calculate method | Adjustment factors        | Lag patterns | Stratified analysis | Main findings                                                                                                                                                                                                                                                                                                                                                                                                                                                                                                                                                                                                                                                                                                                                                                                                                      |
|-------|----------|--------------|---------------|---------------------|----------|--------------------|-----------------------|--------------------|----------------------|---------------------------|--------------|---------------------|------------------------------------------------------------------------------------------------------------------------------------------------------------------------------------------------------------------------------------------------------------------------------------------------------------------------------------------------------------------------------------------------------------------------------------------------------------------------------------------------------------------------------------------------------------------------------------------------------------------------------------------------------------------------------------------------------------------------------------------------------------------------------------------------------------------------------------|
|       |          |              |               |                     |          |                    |                       |                    |                      | the week, public holidays |              |                     | <p>increases of 2.8 (95%CI:1.3-4.4), 2.0(95%CI:0.4-3.5), 1.9(95%CI: 0.3-3.6) years for female and 3.6(95%CI: 1.7-5.5), 2.5(95%CI:0.5- 4.4), 3.3 (95%CI:1.3-5.4) years for male . For CVD, a 10µg/m<sup>3</sup> increase in PM<sub>10</sub>, SO<sub>2</sub> and NO<sub>2</sub> in lag01 was related to YLL increases of 1.1 (95%CI:0.4-1.8), 1.5(95%CI: 0.7-2.4), 0.9(95%CI: 0.3-1.6) years for female and 1.7 (95%CI: 0.9-2.5), 1.1(95%CI:0.1- 2.1), 0.9 (95%CI: 0.1-1.7) years for male .</p> <p>3. For non-accidental diseases, a 10µg/m<sup>3</sup> increase in PM<sub>10</sub>, SO<sub>2</sub> and NO<sub>2</sub> in lag01 was related to YLL increases of 4.9 (95%CI:2.5-7.3), 2.8(95%CI:0.4-5.2), 3.8(95%CI:1.3-6.3) years for the youngers and 1.6(95%CI:0.8-2.4), 1.6(95%CI:0.8-2.4), 1.5(95%CI:0.6-2.3) years for the</p> |

| Study            | Location | Study period | Type of study     | studied deaths size | Exposure         | Source of exposure                                                     | Health outcome of YLL                                               | Diagnosis standard                | YLL calculate method | Adjustment factors                                                                              | Lag patterns | Stratified analysis                                          | Main findings                                                                                                                                                                                                                                                                                                                                                                                                                                                                               |
|------------------|----------|--------------|-------------------|---------------------|------------------|------------------------------------------------------------------------|---------------------------------------------------------------------|-----------------------------------|----------------------|-------------------------------------------------------------------------------------------------|--------------|--------------------------------------------------------------|---------------------------------------------------------------------------------------------------------------------------------------------------------------------------------------------------------------------------------------------------------------------------------------------------------------------------------------------------------------------------------------------------------------------------------------------------------------------------------------------|
|                  |          |              |                   |                     |                  |                                                                        |                                                                     |                                   |                      |                                                                                                 |              |                                                              | elders. For CVD, a 10µg/m <sup>3</sup> increase in PM <sub>10</sub> , SO <sub>2</sub> and NO <sub>2</sub> in lag01 was related to YLL increases of 1.9(95% CI:1.1-2.8), 1.2(95%CI:0.1-2.4), 1.1(95%CI:0.3-2.0)years for the youngers and 0.8(95%CI:0.3-1.2), 1.3(95%CI: 0.7-1.9), 0.8(95%CI: 0.4-1.2) years for the elders .                                                                                                                                                                |
| Chen et al. 2017 | Chengdu  | 2010-2014    | Time-series study | 366353 deaths       | PM <sub>10</sub> | From 12 monitoring stations of Sichuan Environmental Monitoring Center | Non-accidental disease, respiratory disease, cardiovascular disease | ICD-10: A00-R99, J00-J99, I00-I99 | Abridged life table  | Long-term trends, seasonality, temperature, relative humidity, air pressure, wind speed, day of | Lag0-lag5    | 1. Gender: female and male;<br>2. Age: <60years and ≥60years | 1. A 1µg/m <sup>3</sup> increase in PM <sub>10</sub> was related to YLL increases of 0.26893 (95%CI:-1.34023-1.87809) for non-accidental diseases, 0.30437 (95%CI:-0.16546-0.77421) for RD, 0.21924(95%CI:-0.32917-0.76765) for CVD.<br>2. A 1µg/m <sup>3</sup> increase in PM <sub>10</sub> was related to YLL increases of 0.01711 (95%CI:-1.43261-1.46683) in female and 0.85985(95%CI:-0.38123-2.10094), 0.05980(95%CI: -0.19997-0.24774) in the youngers and 0.14495 (95%CI: -0.00285- |

| Study          | Location | Study period | Type of study     | studied deaths size | Exposure                             | Source of exposure                                                   | Health outcome of YLL                 | Diagnosis standard | YLL calculate method | Adjustment factors                                   | Lag patterns                                        | Stratified analysis                                        | Main findings                                                                                                                                                                                                                                                                                                                                                                                                                                                 |
|----------------|----------|--------------|-------------------|---------------------|--------------------------------------|----------------------------------------------------------------------|---------------------------------------|--------------------|----------------------|------------------------------------------------------|-----------------------------------------------------|------------------------------------------------------------|---------------------------------------------------------------------------------------------------------------------------------------------------------------------------------------------------------------------------------------------------------------------------------------------------------------------------------------------------------------------------------------------------------------------------------------------------------------|
|                |          |              |                   |                     |                                      |                                                                      |                                       |                    |                      | the week                                             |                                                     |                                                            | 0.23071) in the elders for non-accidental diseases, 0.08367(95%CI: -0.00906-0.17640) in females and 0.31315(95%CI:-0.04772-0.67402) in males, 0.15029(95%CI: -0.87797-0.60053) in the youngers and 0.22671(95%CI:0.00902-0.39550) in the elders for RD, 0.00445(95%CI: -0.35882-0.36779) in females and 0.33841(95%CI:-0.01519-0.69201) in males, 0.10349(95%CI:-0.73862-0.29345) in the youngers and 0.26600 (95%CI:-0.27786-0.31021) in the elders for CVD. |
| Li et al. 2017 | Ningbo   | 2011-2015    | Time-series study | 18472 COPD deaths   | PM <sub>2.5</sub> , PM <sub>10</sub> | From 11 monitoring sites from the Environmental Monitoring Center of | Chronic obstructive pulmonary disease | ICD-10: J40-44     | WHO life table       | Secular trends, seasonality, temperature, relatively | Lag04 (main analysis),<br>Lag01-lag07;<br>Lag0-lag7 | 1.Gender: female and male;<br>2.Age: <75years and ≥75years | 1. A 10µg/m <sup>3</sup> increase in PM <sub>2.5</sub> ,PM <sub>10</sub> in lag04 was related to YLL increases of 0.91 (95%CI:0.16-1.66), 0.81 (95%CI:0.30-1.33) years.<br>2. A10µg/m <sup>3</sup> increase in PM <sub>2.5</sub> in lag04 was related to YLL increases of 0.45 (95%CI:-0.04-0.94)years for                                                                                                                                                    |

| Study           | Location                     | Study period | Type of study     | studied deaths size | Exposure        | Source of exposure                                                          | Health outcome of YLL  | Diagnosis standard | YLL calculate method | Adjustment factors                                                             | Lag patterns          | Stratified analysis | Main findings                                                                                                                                                                                                                                    |
|-----------------|------------------------------|--------------|-------------------|---------------------|-----------------|-----------------------------------------------------------------------------|------------------------|--------------------|----------------------|--------------------------------------------------------------------------------|-----------------------|---------------------|--------------------------------------------------------------------------------------------------------------------------------------------------------------------------------------------------------------------------------------------------|
|                 |                              |              |                   |                     |                 | Ningbo                                                                      |                        |                    |                      | humidity, day of week                                                          |                       |                     | female and 0.47 (95%CI:-0.08-1.01) years for male .<br><br>3. A 10µg/m³ increase in PM <sub>2.5</sub> in lag04 was related to YLL increases of -0.06 (95%CI:-0.54-0.42)years for the youngers and 0.98 (95%CI: 0.42-1.54) years for the elders . |
| Ni et al. 2017a | 6 urban districts in Tianjin | 2001-2010    | Time-series study | ——                  | NO <sub>2</sub> | From 6 monitoring sites from the Environmental Monitoring Center of Tianjin | Non-accidental disease | ICD-10: A00-R99    | WHO life table       | Long-term trends, seasonality, the day of week, temperature, relative humidity | Lag 0-lag1;<br>Lag 01 | ——                  | 1. A 10µg/m³ increase in NO <sub>2</sub> in lag01 was related to YLL increases of 1.62 (95%CI:0.69-2.54) years.                                                                                                                                  |

| Study             | Location                     | Study period | Type of study     | studied deaths size                                                | Exposure         | Source of exposure                                                          | Health outcome of YLL                                               | Diagnosis standard                | YLL calculate method | Adjustment factors                                                             | Lag patterns          | Stratified analysis                                        | Main findings                                                                                                                                                                                                                                                                                                                                                                               |
|-------------------|------------------------------|--------------|-------------------|--------------------------------------------------------------------|------------------|-----------------------------------------------------------------------------|---------------------------------------------------------------------|-----------------------------------|----------------------|--------------------------------------------------------------------------------|-----------------------|------------------------------------------------------------|---------------------------------------------------------------------------------------------------------------------------------------------------------------------------------------------------------------------------------------------------------------------------------------------------------------------------------------------------------------------------------------------|
| Ni et al. 2017b   | Nankai district in Tianjin   | 2001-2010    | Time-series study | 53554 deaths, 27290 cardiovascular deaths, 4597 respiratory deaths | SO <sub>2</sub>  | From 1 monitoring sites from the Environmental Monitoring Center of Tianjin | Non-accidental disease, cardiovascular disease, respiratory disease | ICD-10: A00-R99, I00-I99, J00-J99 | WHO life tables      | Long-term trends, seasonality, the day of week, temperature, relative humidity | Lag 0-lag1;<br>Lag 01 | ——                                                         | 1. A 10µg/m <sup>3</sup> increase in SO <sub>2</sub> in lag01 was related to YLL increases of 1.38 (95%CI:0.43-2.34) years for non-accidental diseases, 0.56(95%CI:-0.07-1.18) for CVD, 0.17(95%CI:-0.05-0.38) for RD.                                                                                                                                                                      |
| Zeng et al. 2017a | 6 urban districts in Tianjin | 2001-2010    | Time-series study | 270277 deaths                                                      | PM <sub>10</sub> | From 6 monitoring sites from the Environmental Monitoring Center of Tianjin | Non-accidental disease                                              | ICD-10: A00-R99                   | WHO life table       | Long-term trends, seasonality, the day of week, temperature, relative humidity | Lag 0-lag1;<br>Lag 01 | 1.Gender: female and male;<br>2.Age: <65years and ≥65years | 1. A 10µg/m <sup>3</sup> increase in PM <sub>10</sub> in lag01 was related to YLL increases of 0.4(95%CI:-0.0-0.9), 0.3(95%CI:-0.2-0.8), -0.0(95%CI:-0.5-0.5), 0.5 (95%CI: 0.1-1.0), 0.2(95%CI:-0.1-0.5), -0.1 (95%CI:-0.6-0.3) for the youngers and 0.6(95%CI:0.3-1.0), 0.7(95%CI:0.3-1.1), 0.5(95%CI:0.1-0.9), 0.9(95%CI:0.5-1.3), 0.3(95%CI:0.0-0.6), 0.6(95%CI:0.2-1.0) for the elders. |

| Study             | Location                     | Study period | Type of study     | studied deaths size      | Exposure         | Source of exposure                                                          | Health outcome of YLL                                       | Diagnosis standard                                  | YLL calculate method | Adjustment factors                                                             | Lag patterns                                         | Stratified analysis                                        | Main findings                                                                                                                                                                                                                                                                                                                                                                                                                                                                               |
|-------------------|------------------------------|--------------|-------------------|--------------------------|------------------|-----------------------------------------------------------------------------|-------------------------------------------------------------|-----------------------------------------------------|----------------------|--------------------------------------------------------------------------------|------------------------------------------------------|------------------------------------------------------------|---------------------------------------------------------------------------------------------------------------------------------------------------------------------------------------------------------------------------------------------------------------------------------------------------------------------------------------------------------------------------------------------------------------------------------------------------------------------------------------------|
| Zeng et al. 2017b | 6 urban districts in Tianjin | 2001-2010    | Time-series study | 25908 respiratory deaths | PM <sub>10</sub> | From 6 monitoring sites from the Environmental Monitoring Center of Tianjin | Respiratory disease                                         | ICD-10                                              | WHO life table       | Long-term trends, seasonality, the day of week, temperature, relative humidity | Lag 0-lag1;<br>Lag 01                                | 1.Gender: female and male;<br>2.Age: <65years and ≥65years | 1.A 10μg/m <sup>3</sup> increase in PM <sub>10</sub> in lag01 was related to YLL increases of 0.84 (95%CI:0.45-1.23) years.<br>2. A 10μg/m <sup>3</sup> increase in PM <sub>10</sub> in lag01 was related to YLL increases of 0.59 (95%CI:0.34-0.83) for females and 0.26 (95%CI:-0.01-0.52) for males.<br>3. A 10μg/m <sup>3</sup> increase in PM <sub>10</sub> in lag01 was related to YLL increases of 0.26(95%CI:0.03-0.48) for the youngers and 0.59 (95%CI:0.28-0.89) for the elders. |
| Zhang et al. 2017 | 2 urban districts in Wuhan   | 2009-2012    | Time-series study | —                        | PM <sub>10</sub> | From Wuhan Environmental Monitoring Center                                  | Non-accidental disease, cardiovascular disease, respiratory | ICD-10: A00-R99, I00-I99, J00-J99, I60-I69, I20-I25 | WHO life table       | Long-term trends, seasonality, the day of week,                                | Lag 01 (main analysis);<br>Lag0-lag3;<br>Lag01-lag03 | 1.Gender: female and male;<br>2.Age: <75years and          | 1.A 10μg/m <sup>3</sup> increase in PM <sub>10</sub> in lag01 was related to YLL increases of 1.23 (95%CI:0.15-2.31) for non-accidental diseases, 0.88(95%CI: 0.36-1.40) for CVD, 0.18(95%CI: -0.04-0.41) for RD.<br>2. A 10μg/m <sup>3</sup> increase in PM <sub>10</sub> in                                                                                                                                                                                                               |

| Study           | Location | Study period | Type of study     | studied deaths size | Exposure                                                                 | Source of exposure                                                                                  | Health outcome of YLL                                                                        | Diagnosis standard                         | YLL calculate method | Adjustment factors                                    | Lag patterns                     | Stratified analysis                                            | Main findings                                                                                                                                                                                                                                                                                                                                                                                                                                                                                                                                                                                                                                                                          |
|-----------------|----------|--------------|-------------------|---------------------|--------------------------------------------------------------------------|-----------------------------------------------------------------------------------------------------|----------------------------------------------------------------------------------------------|--------------------------------------------|----------------------|-------------------------------------------------------|----------------------------------|----------------------------------------------------------------|----------------------------------------------------------------------------------------------------------------------------------------------------------------------------------------------------------------------------------------------------------------------------------------------------------------------------------------------------------------------------------------------------------------------------------------------------------------------------------------------------------------------------------------------------------------------------------------------------------------------------------------------------------------------------------------|
|                 |          |              |                   |                     |                                                                          |                                                                                                     | disease<br><br>Stroke, ischemic heart disease                                                |                                            |                      | temperature, relative humidity, public holiday        |                                  | ≥75years                                                       | lag01 was related to YLL increases of 0.59 (95%CI:-0.04-1.23) for females, 0.63(95%CI: -0.21-1.48) for males, 0.77(95%CI: -0.25-1.79) for the youngers, 0.46 (95%CI: 0.14-0.77) for the elders.                                                                                                                                                                                                                                                                                                                                                                                                                                                                                        |
| Zhu et al. 2017 | Wuxi     | 2012-2015    | Time-series study | 117418 deaths       | PM <sub>2.5</sub> , PM <sub>10</sub> , SO <sub>2</sub> , NO <sub>2</sub> | From 7 state-controlled monitoring stations from the Wuxi Municipal Environmental Monitoring Center | Non-accidental disease, cardiovascular disease, respiratory disease<br><br>Diabetes mellitus | ICD-10: A00-R99, I00-I99, J00-J99, E10-E14 | WHO life table       | Time, the day of week, temperature, relative humidity | Lag02 (main analysis); lag0-lag6 | 1.Gender: female and male;<br><br>2.Age: ≤75years and >75years | 1. An IQR increase in PM <sub>2.5</sub> (39 µg/m <sup>3</sup> )PM <sub>10</sub> (56 µg/m <sup>3</sup> ),SO <sub>2</sub> (23 µg/m <sup>3</sup> ) and NO <sub>2</sub> (21µg/m <sup>3</sup> )in lag02 was related to YLL increases of 12.09 (95%CI: 2.98-21.2), 13.69(95%CI: 3.32-24.07), 24.39 (95%CI: 8.62 -40.15), 26.95 (95%CI: 13.99 -39.91) years.<br><br>2. For females, an IQR increase inPM <sub>2.5</sub> , PM <sub>10</sub> ,SO <sub>2</sub> and NO <sub>2</sub> in lag02 was related to YLL increases of 7.57 (95%CI:1.99-13.14), 7.67(95%CI: 1.32-14.02), 12.80(95%CI:3.14-22.45),14.64(95%CI:6.70-22.58) years for non-accidental diseases, 3.04(95%CI:0.72-5.37), 4.10(95% |

| Study | Location | Study period | Type of study | studied deaths size | Exposure | Source of exposure | Health outcome of YLL | Diagnosis standard | YLL calculate method | Adjustment factors | Lag patterns | Stratified analysis | Main findings                                                                                                                                                                                                                                                                                                                                                                                                                                                                                                                                                                                                                                                                                                                                                                                                                                                                      |
|-------|----------|--------------|---------------|---------------------|----------|--------------------|-----------------------|--------------------|----------------------|--------------------|--------------|---------------------|------------------------------------------------------------------------------------------------------------------------------------------------------------------------------------------------------------------------------------------------------------------------------------------------------------------------------------------------------------------------------------------------------------------------------------------------------------------------------------------------------------------------------------------------------------------------------------------------------------------------------------------------------------------------------------------------------------------------------------------------------------------------------------------------------------------------------------------------------------------------------------|
|       |          |              |               |                     |          |                    |                       |                    |                      |                    |              |                     | <p>CI:1.46-6.75), 8.20(95%CI: 4.19-12.22), 6.79(95%CI:3.48-10.10) years for CVD, 0.98(95%CI:0.72-5.37), 0.58(95%CI:-0.80-1.96), 1.16 (95%CI:-0.94-3.25), 1.91(95%CI: 0.18-3.63) years for RD. For males, an IQR increase inPM<sub>2.5</sub>, PM<sub>10</sub>,SO<sub>2</sub> and NO<sub>2</sub> in lag02 was related to YLL increases of 4.53(95%CI:-2.26-11.31), 6.02(95%CI:-1.71-13.75), 11.69(95%CI:-0.16-23.34), 12.31 (95%CI:2.63-21.99) years for non-accidental diseases, -0.83(95% CI:-3.84-2.19), -0.81(95%CI:-4.25-2.62),1.09(95%CI:-4.13-6.32), -0.54 (95%CI:-4.85-3.76) years for CVD, 0.28(95%CI:-1.29-1.84), 0.02(95% CI:-1.76-1.81), 0.84(95%CI:-1.88-3.55),0.04(95%CI:-2.19-2.28) years for RD.</p> <p>3. For the youngers, an IQR increase inPM<sub>2.5</sub>, PM<sub>10</sub>,SO<sub>2</sub> and NO<sub>2</sub> in lag02 was related to YLL increases of 4.62</p> |

| Study | Location | Study period | Type of study | studied deaths size | Exposure | Source of exposure | Health outcome of YLL | Diagnosis standard | YLL calculate method | Adjustment factors | Lag patterns | Stratified analysis | Main findings                                                                                                                                                                                                                                                                                                                                                                                                                                                                                                                                                                                                                                                                                                                                                                                                                                            |
|-------|----------|--------------|---------------|---------------------|----------|--------------------|-----------------------|--------------------|----------------------|--------------------|--------------|---------------------|----------------------------------------------------------------------------------------------------------------------------------------------------------------------------------------------------------------------------------------------------------------------------------------------------------------------------------------------------------------------------------------------------------------------------------------------------------------------------------------------------------------------------------------------------------------------------------------------------------------------------------------------------------------------------------------------------------------------------------------------------------------------------------------------------------------------------------------------------------|
|       |          |              |               |                     |          |                    |                       |                    |                      |                    |              |                     | (95%CI:-2.68-11.91), 6.18(95%CI:-2.12-14.49), 11.86(95%CI:-0.77-24.49), 10.15(95%CI:-0.26-20.55) years for non-accidental diseases, 7.34(95%CI:-21.74-38.71), 1.37(95%CI:-2.01-4.74), 4.04(95%CI:-1.10-9.17), 0.24(95%CI:-3.99-4.47) years for CVD, -0.02(95%CI:-1.36-1.32), -0.28(95%CI:-1.80-1.25), -0.56(95%CI:-2.88-1.76), -0.78(95%CI:-2.70-1.13) years for RD. For the elders, an IQR increase inPM <sub>2.5</sub> , PM <sub>10</sub> ,SO <sub>2</sub> and NO <sub>2</sub> in lag02 was related to YLL increases of 7.48(95%CI:2.61-12.34), 7.51(95%CI:1.97-13.05), 12.53(95%CI:4.09-20.96),16.81(95%CI:9.89-23.72) years for non-accidental diseases, 1.49(95%CI:-1.04-4.02), 1.92(95%CI:-0.95-4.80), 5.26(95%CI:0.89-9.63), 6.01(95%CI:2.41-9.60) years for CVD, 1.28(95%CI:-0.14-2.71), 0.88(95%CI:-0.74-2.50), 2.56(95%CI:0.10-5.02), 2.73(95% |

| Study              | Location | Study period | Type of study     | studied deaths size         | Exposure                                              | Source of exposure                                                         | Health outcome of YLL  | Diagnosis standard | YLL calculate method | Adjustment factors                                              | Lag patterns                                     | Stratified analysis                                            | Main findings                                                                                                                                                                                                                                                                                                                                                                                                                                                                                                                                                                                                                                                                                                                                                                                                                               |
|--------------------|----------|--------------|-------------------|-----------------------------|-------------------------------------------------------|----------------------------------------------------------------------------|------------------------|--------------------|----------------------|-----------------------------------------------------------------|--------------------------------------------------|----------------------------------------------------------------|---------------------------------------------------------------------------------------------------------------------------------------------------------------------------------------------------------------------------------------------------------------------------------------------------------------------------------------------------------------------------------------------------------------------------------------------------------------------------------------------------------------------------------------------------------------------------------------------------------------------------------------------------------------------------------------------------------------------------------------------------------------------------------------------------------------------------------------------|
|                    |          |              |                   |                             |                                                       |                                                                            |                        |                    |                      |                                                                 |                                                  |                                                                | CI:0.71-4.76) years for RD.                                                                                                                                                                                                                                                                                                                                                                                                                                                                                                                                                                                                                                                                                                                                                                                                                 |
| Huang et al. 2018a | Ningbo   | 2011-2015    | Time-series study | 10322 ischemic heart deaths | PM <sub>2.5</sub> , SO <sub>2</sub> , NO <sub>2</sub> | From 8 monitoring sites from the Environmental Monitoring Center of Ningbo | Ischemic heart disease | ICD-10: I20-I25    | WHO life table       | Secular trends, day of the week, temperature, relative humidity | Lag 3 (main analysis);<br>Lag0-lag7, lag01-lag07 | 1. Gender: female and male;<br>2. Age: <75 years and ≥75 years | <p>1. A 10µg/m<sup>3</sup> increase in PM<sub>2.5</sub>, SO<sub>2</sub>, NO<sub>2</sub> in lag3 was related to YLL increases of 0.71 (95%CI:-0.21-1.64), 3.31(95%CI:0.78-5.84), 2.27 (95%CI:0.26-4.28) years.</p> <p>2. A 10µg/m<sup>3</sup> increase in PM<sub>2.5</sub>, SO<sub>2</sub>, NO<sub>2</sub> in lag3 was related to YLL increases of 0.34 (95%CI:-0.71-0.86), 0.43(95%CI:-0.98-1.83), 0.08 (95%CI:-1.01-1.20) years for the females, 0.37(95%CI:-0.39-1.13), 2.88(95%CI:0.80-4.97), 2.19(95%CI:0.83-3.84) years for the males.</p> <p>3. A 10µg/m<sup>3</sup> increase in PM<sub>2.5</sub>, SO<sub>2</sub>, NO<sub>2</sub> in lag3 was related to YLL increases of 0.28 (95%CI:-0.55-1.10), 1.90(95%CI:-0.35-4.16), 1.85 (95%CI:0.06-3.64) years for the youngers, 0.44(95%CI:-0.01-1.13), 1.41(95%CI:0.18-2.64), 0.42(95%</p> |

| Study              | Location  | Study period | Type of study     | studied deaths size                                | Exposure                                                               | Source of exposure                                                                 | Health outcome of YLL                 | Diagnosis standard | YLL calculate method                                  | Adjustment factors                                                           | Lag patterns                                        | Stratified analysis                                            | Main findings                                                                                                                                                                                                                                                                                                                                                                                                                       |
|--------------------|-----------|--------------|-------------------|----------------------------------------------------|------------------------------------------------------------------------|------------------------------------------------------------------------------------|---------------------------------------|--------------------|-------------------------------------------------------|------------------------------------------------------------------------------|-----------------------------------------------------|----------------------------------------------------------------|-------------------------------------------------------------------------------------------------------------------------------------------------------------------------------------------------------------------------------------------------------------------------------------------------------------------------------------------------------------------------------------------------------------------------------------|
|                    |           |              |                   |                                                    |                                                                        |                                                                                    |                                       |                    |                                                       |                                                                              |                                                     |                                                                | CI:-0.56-1.40) years for the elders.                                                                                                                                                                                                                                                                                                                                                                                                |
| Huang et al. 2018b | Ningbo    | 2011-2015    | Time-series study | 18472 chronic obstructive pulmonary disease deaths | O <sub>3</sub>                                                         | From 8 monitoring sites from the Environmental Monitoring Center of Ningbo         | Chronic obstructive pulmonary disease | ICD-10: J40-J44    | WHO life table                                        | Secular trend, seasonality, temperature, relative humidity, day of the week  | Lag02 (main analysis);<br>Lag0-lag5;<br>Lag01-lag02 | 1. Gender: female and male;<br>2. Age: <75 years and ≥75 years | 1. A 10µg/m <sup>3</sup> increase in PM <sub>2.5</sub> in lag02 was related to YLL increases of 2.09 (95%CI:0.78-3.39) years.<br>2. A 10ppb increase in O <sub>3</sub> in lag02 was related to YLL increases of 2.37 (95%CI:0.23-4.50) years.                                                                                                                                                                                       |
| Liang et al. 2018  | Hong Kong | 2011-2015    | Time-series study | 9252 acute myocardial infarction deaths            | PM <sub>2.5</sub> , SO <sub>2</sub> , NO <sub>2</sub> , O <sub>3</sub> | From 14 monitoring stations from the Hong Kong Environmental Protection Department | acute myocardial infarction disease   | ICD-10: I21        | Hong Kong Census and Statistics Department life table | Secular trend, seasonality, temperature, relative humidity, day of the week, | Lag01 (main analysis)<br>Lag0-lag3;                 | 1. Gender: female and male;<br>2. Age: ≤65 years and >65 years | 1. A 10µg/m <sup>3</sup> increase in PM <sub>2.5</sub> , SO <sub>2</sub> , NO <sub>2</sub> , O <sub>3</sub> in lag01 was related to YLL increases of 1.69 (95%CI:0.01-3.37), 4.97(95%CI:0.28-9.66), 0.62(95%CI:-0.92-2.17), -0.15(95%CI:-1.28-0.99) years.<br>2. A 10µg/m <sup>3</sup> increase in PM <sub>2.5</sub> in lag01 was related to YLL increases of 0.68 (95%CI:-0.19-1.55) years for females and 1.01 (95%CI:-0.39-2.41) |

| Study             | Location                     | Study period | Type of study     | studied deaths size | Exposure         | Source of exposure                                                          | Health outcome of YLL                                    | Diagnosis standard                | YLL calculate method | Adjustment factors                                    | Lag patterns        | Stratified analysis                                     | Main findings                                                                                                                                                                                                                                                       |
|-------------------|------------------------------|--------------|-------------------|---------------------|------------------|-----------------------------------------------------------------------------|----------------------------------------------------------|-----------------------------------|----------------------|-------------------------------------------------------|---------------------|---------------------------------------------------------|---------------------------------------------------------------------------------------------------------------------------------------------------------------------------------------------------------------------------------------------------------------------|
|                   |                              |              |                   |                     |                  |                                                                             |                                                          |                                   |                      | public holiday                                        |                     |                                                         | years for the males.<br><br>3. A 10µg/m <sup>3</sup> increase in PM <sub>2.5</sub> in lag01 was related to YLL increases of 0.63(95%CI:-0.74-2.01) years for the youngers and 0.93 (95%CI:-0.01-1.87) years for the elders.                                         |
| Zeng et al. 2018a | Tianjin                      | 2001-2010    | Time-series study | ——                  | PM <sub>10</sub> | From 6 monitoring sites from the Environmental Monitoring Center of Tianjin | Cardiovascular disease; stroke<br>Ischemic heart disease | ICD-10: I00-I99; I60-I69; I20-I25 | WHO life table       | Time, the day of week, temperature, relative humidity | Lag0-lag1;<br>Lag01 | ——                                                      | 1. A 10µg/m <sup>3</sup> increase in PM <sub>10</sub> in lag01 was related to YLL increases of 2.86 (95%CI:1.79-3.93) years for the CVD, 1.07(95%CI:0.43-1.71) years for the stroke, 1.59(95%CI:0.95-2.23) years for the IHD.                                       |
| Zeng et al. 2018b | 6 urban districts in Tianjin | 2001-2010    | Time-series study | ——                  | PM <sub>10</sub> | From 6 monitoring sites from the Environmental Monitoring                   | Chronic obstructive pulmonary disease                    | ICD-10: J40-J44                   | WHO life table       | Long-term trends, seasonality, day of the week,       | Lag0-lag1;<br>Lag01 | 1.Gender: female and male;<br><br>2.Age: <65years and ≥ | 1. A 10µg/m <sup>3</sup> increase in PM <sub>10</sub> in lag01 was related to YLL increases of 0.30 (95%CI:0.06-0.54) years.<br><br>2. A 10µg/m <sup>3</sup> increase in PM <sub>10</sub> in lag01 was related to YLL increases of 0.10(95%CI:-0.06-0.27) years for |

| Study         | Location                      | Study period | Type of study     | studied deaths size | Exposure          | Source of exposure                                                   | Health outcome of YLL  | Diagnosis standard | YLL calculate method | Adjustment factors                                                                 | Lag patterns               | Stratified analysis                                        | Main findings                                                                                                                                                                                                                                                                                                                                                                                                                                                                                                                 |
|---------------|-------------------------------|--------------|-------------------|---------------------|-------------------|----------------------------------------------------------------------|------------------------|--------------------|----------------------|------------------------------------------------------------------------------------|----------------------------|------------------------------------------------------------|-------------------------------------------------------------------------------------------------------------------------------------------------------------------------------------------------------------------------------------------------------------------------------------------------------------------------------------------------------------------------------------------------------------------------------------------------------------------------------------------------------------------------------|
|               |                               |              |                   |                     |                   | Center of Tianjin                                                    |                        |                    |                      | temperature, relative humidity                                                     |                            | 65years                                                    | the females and 0.19(95%CI:0.03-0.36) years for the males.<br><br>3. A 10µg/m <sup>3</sup> increase in PM <sub>10</sub> in lag01 was related to YLL increases of 0.02(95%CI:-0.09-0.14) years for the youngers and 0.27(95%CI:0.06-0.48) years for the elders.                                                                                                                                                                                                                                                                |
| Li et al 2018 | Changping district in Beijing | 2014-2017    | Time-series study | ——                  | PM <sub>2.5</sub> | Environmental Protection Department of Changping district in Beijing | Cardiovascular disease | ICD-10: I00-I99    | WHO life table       | Long-term trends, day of the week, public holiday, relative humidity, air pressure | Lag1, lag7, lag14, lag0-21 | 1.Gender: female and male;<br>2.Age: <75years and ≥75years | 1. A 10µg/m <sup>3</sup> increase in PM <sub>2.5</sub> in lag1 was related to YLL increases of 0.26 (95%CI:-0.04-0.56) years.<br>2. A 10µg/m <sup>3</sup> increase in PM <sub>2.5</sub> in lag1 was related to YLL increases of 0.08(95%CI:-0.10-0.26) years for the females and 0.18(95%CI:-0.07-0.42) years for the males.<br>3. A 10µg/m <sup>3</sup> increase in PM <sub>2.5</sub> in lag1 was related to YLL increases of 0.26(95%CI:-0.01-0.53) years for the youngers and 0.00(95%CI:-0.01-0.12) years for the elders. |

| Study            | Location                     | Study period | Type of study     | studied deaths size | Exposure         | Source of exposure                                                          | Health outcome of YLL                                               | Diagnosis standard                 | YLL calculate method | Adjustment factors                                                             | Lag patterns | Stratified analysis | Main findings                                                                                                                                                                                                                                     |
|------------------|------------------------------|--------------|-------------------|---------------------|------------------|-----------------------------------------------------------------------------|---------------------------------------------------------------------|------------------------------------|----------------------|--------------------------------------------------------------------------------|--------------|---------------------|---------------------------------------------------------------------------------------------------------------------------------------------------------------------------------------------------------------------------------------------------|
| Zeng et al. 2019 | 6 urban districts in Tianjin | 2001-2010    | Time-series study | ——                  | PM <sub>10</sub> | From 6 monitoring sites from the Environmental Monitoring Center of Tianjin | Non-accidental disease, cardiovascular disease, respiratory disease | ICD-10: A00-R99, I00-I99, J00-J99, | WHO life table       | Long-term trends, seasonality, day of the week, temperature, relative humidity | Lag01        | ——                  | 1. A 10µg/m <sup>3</sup> increase in PM <sub>10</sub> in lag01 was related to YLL increases of 5.83 (95%CI:4.13-7.54) years for the non-accidental diseases, 2.86 (95% CI:1.79 -3.93) years for the CVD, 0.84 (95%CI:0.45-1.23) years for the RD. |

Table S3 The results before and after applying the trim and fill method

| Diseases                | Air pollutants    | Effect estimates (95%CI) (Years) |                  | Changes                                                   |
|-------------------------|-------------------|----------------------------------|------------------|-----------------------------------------------------------|
|                         |                   | Before                           | After            |                                                           |
| non-accidental diseases |                   |                                  |                  |                                                           |
|                         | PM <sub>2.5</sub> | 1.99(1.00,2.97)                  | 1.68(0.79,2.58)  | Significance unchanged,<br>effect estimates decreased     |
|                         | PM <sub>10</sub>  | 3.33(1.85,4.81)                  | 3.33(1.85,4.81)  | No changes                                                |
|                         | SO <sub>2</sub>   | 7.59(3.61,11.57)                 | 7.59(3.61,11.57) | No changes                                                |
|                         | NO <sub>2</sub>   | 5.84(3.15,8.54)                  | 2.31(-0.58,5.19) | Changing from significant to<br>non-significant           |
| CVD                     |                   |                                  |                  |                                                           |
|                         | PM <sub>2.5</sub> | 0.28(-0.00,0.57)                 | 0.28(-0.00,0.57) | No changes                                                |
|                         | PM <sub>10</sub>  | 1.05(0.17,1.94)                  | 1.05(0.17,1.94)  | No changes                                                |
|                         | SO <sub>2</sub>   | 3.71(-0.37,7.80)                 | 0.56(-2.79,3.91) | Non-significance unchanged,<br>effect estimates decreased |
|                         | NO <sub>2</sub>   | 3.22(1.16,5.27)                  | 2.98(1.24,4.71)  | Significance unchanged,<br>effect estimates decreased     |
| RD                      |                   |                                  |                  |                                                           |

|                   |                        |                  |                                              |
|-------------------|------------------------|------------------|----------------------------------------------|
| PM <sub>2.5</sub> | 0.32(-0.19,0.82)       | 0.32(-0.19,0.82) | No changes                                   |
| PM <sub>10</sub>  | <b>0.44(0.06,0.82)</b> | 0.26(-0.16,0.67) | Changing from significant to non-significant |
| SO <sub>2</sub>   | 1.37(-0.45,3.19)       | 1.37(-.45,3.19)  | No changes                                   |
| NO <sub>2</sub>   | 0.96(-0.03,1.96)       | 0.96(-0.03,1.96) | No changes                                   |

---

Results expressed in changes in disease-specific YLL per 10µg/m<sup>3</sup> increase in air pollutants with 95% confidence intervals. PM<sub>2.5</sub>: particle with aerodynamic diameter ≤ 2.5µm; PM<sub>10</sub>: particle with aerodynamic diameter ≤ 2.5µm; SO<sub>2</sub>: sulfur dioxide; NO<sub>2</sub>: nitrogen dioxide; CVD: cardiovascular disease;RD: respiratory disease.Effect estimates **bold** were statistically significant.

## Part B Risk of bias assessment for each study

| # 1      Guo et al. 2013    |                                                                                                                                                                                                                                                                                                                                                                                                                                                                                                                                                                                      |               |
|-----------------------------|--------------------------------------------------------------------------------------------------------------------------------------------------------------------------------------------------------------------------------------------------------------------------------------------------------------------------------------------------------------------------------------------------------------------------------------------------------------------------------------------------------------------------------------------------------------------------------------|---------------|
| Design                      | Time-series study                                                                                                                                                                                                                                                                                                                                                                                                                                                                                                                                                                    |               |
| Participants                | Deaths in 8 urban districts in Beijing , 2004-2008                                                                                                                                                                                                                                                                                                                                                                                                                                                                                                                                   |               |
| Exposure                    | PM <sub>2.5</sub> , PM <sub>10</sub> , SO <sub>2</sub> , NO <sub>2</sub>                                                                                                                                                                                                                                                                                                                                                                                                                                                                                                             |               |
| Outcomes                    | Non-accidental disease                                                                                                                                                                                                                                                                                                                                                                                                                                                                                                                                                               |               |
| Risk of Bias Assessment     |                                                                                                                                                                                                                                                                                                                                                                                                                                                                                                                                                                                      |               |
| Bias Domain                 | Criterion supportive response                                                                                                                                                                                                                                                                                                                                                                                                                                                                                                                                                        | Judgment      |
| Exposure Assessment         | -PM <sub>2.5</sub> was monitored at the main campus of Peking University, located in the urban center. PM <sub>10</sub> , SO <sub>2</sub> and NO <sub>2</sub> concentrations were obtained from the Beijing municipal environmental monitoring center, which had eight fixed monitoring sites distributed in different part of the urban area.<br><br>- For PM <sub>2.5</sub> , daily average concentration was computed. The daily mean concentrations of PM <sub>10</sub> , SO <sub>2</sub> and NO <sub>2</sub> were calculated by averaging daily data over all monitoring sites. | Probably low  |
| Outcome Assessment          | Mortality data for all ages on non-accidental causes were obtained from the death classification system at the Beijing Public Security Bureau.Mortality cause classified standards were not mentioned.                                                                                                                                                                                                                                                                                                                                                                               | Probably high |
| Confounding                 | Adjusted for long-term trends, seasonality, temperature, relative humidity, air pressure, and the day of the week.                                                                                                                                                                                                                                                                                                                                                                                                                                                                   | Low           |
| Selection                   | Study included all deaths that were registered residents of urban areas of Beijing city and occurred between 1 January 2004 and 31 December 2008.                                                                                                                                                                                                                                                                                                                                                                                                                                    | Low           |
| Incomplete outcome data     | Daily YLL were calculated by summing the YLL for all deaths on that day. However, any potential errors or missing data did not depend on air pollution levels.                                                                                                                                                                                                                                                                                                                                                                                                                       | Low           |
| Selective outcome reporting | All pre-specified outcomes are reported                                                                                                                                                                                                                                                                                                                                                                                                                                                                                                                                              | Low           |
| Conflict of interest        | No potential conflicts of interest were declared.                                                                                                                                                                                                                                                                                                                                                                                                                                                                                                                                    | Low           |
| Other sources of            | No other potential sources of bias identified.                                                                                                                                                                                                                                                                                                                                                                                                                                                                                                                                       | Low           |

| # 2Lu et al. 2015           |                                                                                                                                                                                                                                                                                                                                             |              |
|-----------------------------|---------------------------------------------------------------------------------------------------------------------------------------------------------------------------------------------------------------------------------------------------------------------------------------------------------------------------------------------|--------------|
| Design                      | Time-series study                                                                                                                                                                                                                                                                                                                           |              |
| Participants                | Deaths in 9 urban districts in Nanjing, 2009-2013                                                                                                                                                                                                                                                                                           |              |
| Exposure                    | PM <sub>10</sub> , SO <sub>2</sub> , NO <sub>2</sub>                                                                                                                                                                                                                                                                                        |              |
| Outcomes                    | Non-accidental disease                                                                                                                                                                                                                                                                                                                      |              |
| Risk of Bias Assessment     |                                                                                                                                                                                                                                                                                                                                             |              |
| Bias Domain                 | Criterion supportive response                                                                                                                                                                                                                                                                                                               | Judgment     |
| Exposure Assessment         | -The daily data on PM <sub>10</sub> , SO <sub>2</sub> and NO <sub>2</sub> for 2009-2013 was collected from the Nanjing Environmental Monitoring center.<br><br>-Daily concentrations were provided as daily mean values measured from 9 stat-controlled monitoring stations.<br><br>-No information about the missing data of daily average | Probably low |
| Outcome Assessment          | Daily mortality data (excluding accidental deaths) were obtained from the Jiangsu Provincial Center for Disease Control and Prevention. Causes of death were coded according to the ICD-10 (A00-R99) for all ages.                                                                                                                          | Low          |
| Confounding                 | Adjusted for long-term trends, seasonality, temperature, relative humidity, barometric pressure, the day of the week and public holidays.                                                                                                                                                                                                   | Low          |
| Selection                   | Study included all non-accidental deaths for all ages that occurred between 1 January 2009 and 31 December 2013.                                                                                                                                                                                                                            | Low          |
| Incomplete outcome data     | Daily YLL were calculated by summing the YLL for all deaths on that day. However, any potential errors or missing data did not depend on air pollution levels.                                                                                                                                                                              | Low          |
| Selective outcome reporting | All pre-specified outcomes are reported                                                                                                                                                                                                                                                                                                     | Low          |
| Conflict of interest        | No potential conflicts of interest were declared.                                                                                                                                                                                                                                                                                           | Low          |
| Other sources of            | No other potential sources of bias identified.                                                                                                                                                                                                                                                                                              | Low          |

| # 3He et al. 2016           |                                                                                                                                                                                                                                                                                                                                                                                                                                                                                                                                                                                                                                                                         |              |
|-----------------------------|-------------------------------------------------------------------------------------------------------------------------------------------------------------------------------------------------------------------------------------------------------------------------------------------------------------------------------------------------------------------------------------------------------------------------------------------------------------------------------------------------------------------------------------------------------------------------------------------------------------------------------------------------------------------------|--------------|
| Design                      | Time-series study                                                                                                                                                                                                                                                                                                                                                                                                                                                                                                                                                                                                                                                       |              |
| Participants                | Deaths in Ningbo, 2009-2013                                                                                                                                                                                                                                                                                                                                                                                                                                                                                                                                                                                                                                             |              |
| Exposure                    | PM <sub>2.5</sub> , PM <sub>10</sub> , SO <sub>2</sub> , NO <sub>2</sub>                                                                                                                                                                                                                                                                                                                                                                                                                                                                                                                                                                                                |              |
| Outcomes                    | Non-accidental disease                                                                                                                                                                                                                                                                                                                                                                                                                                                                                                                                                                                                                                                  |              |
| Risk of Bias Assessment     |                                                                                                                                                                                                                                                                                                                                                                                                                                                                                                                                                                                                                                                                         |              |
| Bias Domain                 | Criterion supportive response                                                                                                                                                                                                                                                                                                                                                                                                                                                                                                                                                                                                                                           | Judgment     |
| Exposure Assessment         | <p>-The concentrations of PM<sub>2.5</sub>, PM<sub>10</sub>, SO<sub>2</sub> and NO<sub>2</sub> were monitored consecutively at 11 monitoring sites that cover all districts and counties of Ningbo, including both urban and suburban areas.</p> <p>- The concentrations of PM<sub>2.5</sub>, PM<sub>10</sub>, SO<sub>2</sub> and NO<sub>2</sub> were from the Environment Monitoring Center of Ningbo. Data for PM<sub>2.5</sub> were available from 2011-2013, while other pollutants were from 2009-2013.</p> <p>-Daily average concentrations of pollutants for individual monitoring sites and then the average levels for the whole Ningbo city were derived.</p> | Probably low |
| Outcome Assessment          | Data on non-accidental deaths were obtained from the local mortality register based in the Ningbo Municipal Center for Disease Prevention and Control. Causes of                                                                                                                                                                                                                                                                                                                                                                                                                                                                                                        | Low          |
| Confounding                 | Adjusted for long-term trends, seasonality, temperature, relative humidity, wind speed, and the day of the week.                                                                                                                                                                                                                                                                                                                                                                                                                                                                                                                                                        | Low          |
| Selection                   | Study included all non-accidental deaths for the registered residents for all ages that occurred between 1 January 2009 and 31 December 2013.                                                                                                                                                                                                                                                                                                                                                                                                                                                                                                                           | Low          |
| Incomplete outcome data     | Daily YLL were calculated by summing the YLL for all deaths on that day. However, any potential errors or missing data did not depend on air pollution levels.                                                                                                                                                                                                                                                                                                                                                                                                                                                                                                          | Low          |
| Selective outcome reporting | All pre-specified outcomes are reported                                                                                                                                                                                                                                                                                                                                                                                                                                                                                                                                                                                                                                 | Low          |
| Conflict of interest        | No potential conflicts of interest were declared.                                                                                                                                                                                                                                                                                                                                                                                                                                                                                                                                                                                                                       | Low          |

|                       |                                                |     |
|-----------------------|------------------------------------------------|-----|
| Other sources of bias | No other potential sources of bias identified. | Low |
|-----------------------|------------------------------------------------|-----|

| # 4Yang et al. 2016         |                                                                                                                                                                                                                                                                                    |              |
|-----------------------------|------------------------------------------------------------------------------------------------------------------------------------------------------------------------------------------------------------------------------------------------------------------------------------|--------------|
| Design                      | Time-series study                                                                                                                                                                                                                                                                  |              |
| Participants                | Deaths in 6 central urban districts in Guangzhou, 2004-2007                                                                                                                                                                                                                        |              |
| Exposure                    | PM <sub>10</sub> , SO <sub>2</sub> , NO <sub>2</sub>                                                                                                                                                                                                                               |              |
| Outcomes                    | Non-accidental disease, cardiovascular disease, ischemic heart disease, stroke                                                                                                                                                                                                     |              |
| Risk of Bias Assessment     |                                                                                                                                                                                                                                                                                    |              |
| Bias Domain                 | Criterion supportive response                                                                                                                                                                                                                                                      | Judgment     |
| Exposure Assessment         | -Daily data of PM <sub>10</sub> , SO <sub>2</sub> and NO <sub>2</sub> from 2004-2007 were supplied by Guangzhou Bureau of Environmental Protection.<br><br>-No information about the missing data of daily average                                                                 | Probably low |
| Outcome Assessment          | Individual data of deaths were provided by Guangzhou Bureau of Health from 1 January 2004 to 31 December 2007 in six central urban districts of Guangzhou. Causes of death were coded according to the ICD-10 (non-accidental mortality: A00-R99; cardiovascular disease: I00-I99; | Low          |
| Confounding                 | Adjusted for long-term trends, seasonality, temperature, relative humidity, atmospheric pressure, the day of the week                                                                                                                                                              | Low          |
| Selection                   | Study included all deaths from 1 January 2004 to 31 December 2007 in six central urban districts of Guangzhou.                                                                                                                                                                     | Low          |
| Incomplete outcome data     | Daily YLL were calculated by summing the YLL for all deaths on that day. However, any potential errors or missing data did not depend on air pollution levels.                                                                                                                     | Low          |
| Selective outcome reporting | All pre-specified outcomes are reported                                                                                                                                                                                                                                            | Low          |
| Conflict of interest        | No potential conflicts of interest were declared.                                                                                                                                                                                                                                  | Low          |
| Other sources of            | No other potential sources of bias identified.                                                                                                                                                                                                                                     | Low          |

| # 5Chen et al. 2017         |                                                                                                                                                                                                                                                                                                                       |              |
|-----------------------------|-----------------------------------------------------------------------------------------------------------------------------------------------------------------------------------------------------------------------------------------------------------------------------------------------------------------------|--------------|
| Design                      | Time-series study                                                                                                                                                                                                                                                                                                     |              |
| Participants                | Deaths in 19 districts in Chengdu, 2010-2014                                                                                                                                                                                                                                                                          |              |
| Exposure                    | PM <sub>10</sub>                                                                                                                                                                                                                                                                                                      |              |
| Outcomes                    | Non-accidental disease, respiratory disease, cardiovascular disease                                                                                                                                                                                                                                                   |              |
| Risk of Bias Assessment     |                                                                                                                                                                                                                                                                                                                       |              |
| Bias Domain                 | Criterion supportive response                                                                                                                                                                                                                                                                                         | Judgment     |
| Exposure Assessment         | -Daily air pollutant data over the period were obtained from the Sichuan Environmental Monitoring Center.<br><br>-The daily average concentration of PM <sub>10</sub> was obtained by averaging the daily mean values from the 12 monitoring stations.<br><br>-No information about the missing data of daily average | Probably low |
| Outcome Assessment          | Data on daily mortality were obtained from 19 death surveillance sites of the Sichuan Center for Disease Control and Prevention which are located in all the 19 districts.<br><br>Causes of death were coded according to the ICD-10 (non-accidental disease: A00-R99; respiratory disease:                           | Low          |
| Confounding                 | Adjusted for long-term trends, the seasonal trend, temperature, relative humidity, air pressure, wind speed, and                                                                                                                                                                                                      | Low          |
| Selection                   | Study included all daily mortality data for all ages that occurred between 1 January 2010 and 31 December                                                                                                                                                                                                             | Low          |
| Incomplete outcome data     | Daily YLL were calculated for each death. However, any potential errors or missing data did not depend on air                                                                                                                                                                                                         | Low          |
| Selective outcome reporting | All pre-specified outcomes are reported                                                                                                                                                                                                                                                                               | Low          |
| Conflict of interest        | No potential conflicts of interest were declared.                                                                                                                                                                                                                                                                     | Low          |
| Other sources of            | No other potential sources of bias identified.                                                                                                                                                                                                                                                                        | Low          |

| # 6Li et al. 2017           |                                                                                                                                                                                                                                                                                                                                                                                                                                                                                                                                                                            |          |
|-----------------------------|----------------------------------------------------------------------------------------------------------------------------------------------------------------------------------------------------------------------------------------------------------------------------------------------------------------------------------------------------------------------------------------------------------------------------------------------------------------------------------------------------------------------------------------------------------------------------|----------|
| Design                      | Time-series study                                                                                                                                                                                                                                                                                                                                                                                                                                                                                                                                                          |          |
| Participants                | Deaths of chronic obstructive pulmonary disease in Ningbo, 2011-2015                                                                                                                                                                                                                                                                                                                                                                                                                                                                                                       |          |
| Exposure                    | PM <sub>2.5</sub> , PM <sub>10</sub>                                                                                                                                                                                                                                                                                                                                                                                                                                                                                                                                       |          |
| Outcomes                    | Chronic obstructive pulmonary disease                                                                                                                                                                                                                                                                                                                                                                                                                                                                                                                                      |          |
| Risk of Bias Assessment     |                                                                                                                                                                                                                                                                                                                                                                                                                                                                                                                                                                            |          |
| Bias Domain                 | Criterion supportive response                                                                                                                                                                                                                                                                                                                                                                                                                                                                                                                                              | Judgment |
| Exposure Assessment         | <p>-Concentrations of PM<sub>2.5</sub>, PM<sub>10</sub> were monitored continuously at 11 monitoring sites which cover urban and suburban areas of Ningbo.</p> <p>-The Environment Monitoring Center of Ningbo collects the pollutants concentrations from all the monitoring sites of the city and records the hourly concentration, from which the daily average levels for all the individual monitoring sites and the whole city levels were derived.</p> <p>-Number of missing is less than 1% and the missing values were substituted with the mean daily value.</p> | Low      |
| Outcome Assessment          | Daily mortality data on deaths of COPD between January 1 <sup>st</sup> 2011 and December 31 <sup>th</sup> 2015 were obtained from Ningbo Municipal Center for Disease Control and Prevention. COPD deaths were identified according to the ICD-10:                                                                                                                                                                                                                                                                                                                         | Low      |
| Confounding                 | Adjusted for long-term trends, seasonality, temperature, relative humidity, and the day of the week.                                                                                                                                                                                                                                                                                                                                                                                                                                                                       | Low      |
| Selection                   | Study included all COPD deaths for all ages and all registered residents that occurred between 1 January 2011 and 31 December 2015.                                                                                                                                                                                                                                                                                                                                                                                                                                        | Low      |
| Incomplete outcome data     | Daily YLL were calculated by summing the YLL for all deaths on the same day. However, any potential errors or missing data did not depend on air pollution levels.                                                                                                                                                                                                                                                                                                                                                                                                         | Low      |
| Selective outcome reporting | All pre-specified outcomes are reported                                                                                                                                                                                                                                                                                                                                                                                                                                                                                                                                    | Low      |
| Conflict of interest        | No potential conflicts of interest were declared.                                                                                                                                                                                                                                                                                                                                                                                                                                                                                                                          | Low      |
| Other sources of            | No other potential sources of bias identified.                                                                                                                                                                                                                                                                                                                                                                                                                                                                                                                             | Low      |

| # 7Ni et al. 2017a          |                                                                                                                                                                                                                                                                                                                         |              |
|-----------------------------|-------------------------------------------------------------------------------------------------------------------------------------------------------------------------------------------------------------------------------------------------------------------------------------------------------------------------|--------------|
| Design                      | Time-series study                                                                                                                                                                                                                                                                                                       |              |
| Participants                | Deaths in 6 urban districts in Tianjin, 2001-2010                                                                                                                                                                                                                                                                       |              |
| Exposure                    | NO <sub>2</sub>                                                                                                                                                                                                                                                                                                         |              |
| Outcomes                    | Non-accidental disease                                                                                                                                                                                                                                                                                                  |              |
| Risk of Bias Assessment     |                                                                                                                                                                                                                                                                                                                         |              |
| Bias Domain                 | Criterion supportive response                                                                                                                                                                                                                                                                                           | Judgment     |
| Exposure Assessment         | -The daily data on NO <sub>2</sub> for 2001-2010 was collected from the Tianjin Environmental Monitoring center.<br><br>-Daily concentrations were provided as daily mean values from 6 stat-controlled monitoring stations.<br><br>-No information about the missing data of daily average concentration was reported. | Probably low |
| Outcome Assessment          | Daily mortality data were obtained from the Tianjin Center for Disease Control and Prevention. Causes of death were coded according to the ICD-10 (A00-R99).                                                                                                                                                            | Low          |
| Confounding                 | Adjusted for long-term trends, seasonality, temperature, relative humidity, and the day of the week.                                                                                                                                                                                                                    | Low          |
| Selection                   | Study included all non-accidental deaths that occurred between 1 January 2001 and 31 December 2010.                                                                                                                                                                                                                     | Low          |
| Incomplete outcome data     | Daily YLL were calculated by summing the YLL for all deaths on that day. However, any potential errors or missing data did not depend on air pollution levels.                                                                                                                                                          | Low          |
| Selective outcome reporting | All pre-specified outcomes are reported                                                                                                                                                                                                                                                                                 | Low          |
| Conflict of interest        | No potential conflicts of interest were declared.                                                                                                                                                                                                                                                                       | Low          |
| Other sources of            | No other potential sources of bias identified.                                                                                                                                                                                                                                                                          | Low          |

| # 8Ni et al. 2017b          |                                                                                                                                                                                                                                                                                                                             |              |
|-----------------------------|-----------------------------------------------------------------------------------------------------------------------------------------------------------------------------------------------------------------------------------------------------------------------------------------------------------------------------|--------------|
| Design                      | Time-series study                                                                                                                                                                                                                                                                                                           |              |
| Participants                | Deaths in Nankai districts in Tianjin, 2001-2010                                                                                                                                                                                                                                                                            |              |
| Exposure                    | SO <sub>2</sub>                                                                                                                                                                                                                                                                                                             |              |
| Outcomes                    | Non-accidental disease, cardiovascular disease, respiratory disease                                                                                                                                                                                                                                                         |              |
| Risk of Bias Assessment     |                                                                                                                                                                                                                                                                                                                             |              |
| Bias Domain                 | Criterion supportive response                                                                                                                                                                                                                                                                                               | Judgment     |
| Exposure Assessment         | -The daily data on SO <sub>2</sub> for 2001-2010 was collected from the Tianjin Environmental Monitoring center (n=3652).<br><br>-Daily concentrations were provided as daily mean values from the monitoring station located in Nankai district in Tianjin.<br><br>-No information about the missing data of daily average | Probably low |
| Outcome Assessment          | Daily mortality data were obtained from the Tianjin Center for Disease Control and Prevention. Causes of death were coded according to the ICD-10 (non-accidental disease: A00-R99; cardiovascular disease: I00-I99; respiratory                                                                                            | Low          |
| Confounding                 | Adjusted for long-term trends, seasonality, temperature, relative humidity, and the day of the week.                                                                                                                                                                                                                        | Low          |
| Selection                   | Study included all deaths that occurred between 1 January 2001 and 31 December 2010.                                                                                                                                                                                                                                        | Low          |
| Incomplete outcome data     | Daily YLL were calculated by summing the YLL for all deaths on that day. However, any potential errors or missing data did not depend on air pollution levels.                                                                                                                                                              | Low          |
| Selective outcome reporting | All pre-specified outcomes are reported                                                                                                                                                                                                                                                                                     | Low          |
| Conflict of interest        | No potential conflicts of interest were declared.                                                                                                                                                                                                                                                                           | Low          |
| Other sources of            | No other potential sources of bias identified.                                                                                                                                                                                                                                                                              | Low          |

| # 9Zeng et al. 2017a        |                                                                                                                                                                                                                                                                                                                                                   |          |
|-----------------------------|---------------------------------------------------------------------------------------------------------------------------------------------------------------------------------------------------------------------------------------------------------------------------------------------------------------------------------------------------|----------|
| Design                      | Time-series study                                                                                                                                                                                                                                                                                                                                 |          |
| Participants                | Deaths in 6 urban districts in Tianjin, 2001-2010                                                                                                                                                                                                                                                                                                 |          |
| Exposure                    | PM <sub>10</sub>                                                                                                                                                                                                                                                                                                                                  |          |
| Outcomes                    | Non-accidental disease                                                                                                                                                                                                                                                                                                                            |          |
| Risk of Bias Assessment     |                                                                                                                                                                                                                                                                                                                                                   |          |
| Bias Domain                 | Criterion supportive response                                                                                                                                                                                                                                                                                                                     | Judgment |
| Exposure Assessment         | -During the study period, the daily average concentration of PM <sub>10</sub> from the city central air-monitoring stations of each district was obtained from the Tianjin Environmental Monitoring Center.<br><br>-Each district has one central air-monitoring station.<br><br>-There was less than 0.5% missing data of PM <sub>10</sub> . The | Low      |
| Outcome Assessment          | Daily mortality data on non-accidental death between January 1 <sup>st</sup> 2001 and December 31 <sup>st</sup> 2010 was obtained from the Tianjin Center for Disease Control and Prevention. The causes of non-accidental death were classified and coded based on ICD10 (A00-R99).                                                              | Low      |
| Confounding                 | Adjusted for long-term trends, seasonality, temperature, relative humidity, and the day of the week.                                                                                                                                                                                                                                              | Low      |
| Selection                   | Daily mortality data on non-accidental death between January 1 <sup>st</sup> 2001 and December 31 <sup>st</sup> 2010 was obtained from the Tianjin Center for Disease Control and Prevention.                                                                                                                                                     | Low      |
| Incomplete outcome data     | Daily YLL were calculated by summing the YLL for all deaths on that day. However, any potential errors or missing data did not depend on air pollution levels.                                                                                                                                                                                    | Low      |
| Selective outcome reporting | All pre-specified outcomes are reported                                                                                                                                                                                                                                                                                                           | Low      |
| Conflict of interest        | The authors declare no conflicts of interest.                                                                                                                                                                                                                                                                                                     | Low      |
| Other sources of            | No other potential sources of bias identified.                                                                                                                                                                                                                                                                                                    | Low      |

| # 10Zeng et al. 2017b       |                                                                                                                                                                                                                                                                                                        |              |
|-----------------------------|--------------------------------------------------------------------------------------------------------------------------------------------------------------------------------------------------------------------------------------------------------------------------------------------------------|--------------|
| Design                      | Time-series study                                                                                                                                                                                                                                                                                      |              |
| Participants                | Deaths in 6 urban districts in Tianjin, 2001-2010                                                                                                                                                                                                                                                      |              |
| Exposure                    | PM <sub>10</sub>                                                                                                                                                                                                                                                                                       |              |
| Outcomes                    | Respiratory disease                                                                                                                                                                                                                                                                                    |              |
| Risk of Bias Assessment     |                                                                                                                                                                                                                                                                                                        |              |
| Bias Domain                 | Criterion supportive response                                                                                                                                                                                                                                                                          | Judgment     |
| Exposure Assessment         | -The daily air pollutant monitoring data was obtained from the Tianjin Environmental Monitoring Center.<br><br>-The air pollutant monitoring data was collected from six urban districts in Tianjin.<br><br>-No information about the missing data of daily average concentration was reported.        | Probably low |
| Outcome Assessment          | Daily mortality data regarding respiratory death (ICD-10: A00-R99) was obtained from the Death Register and Report Information System, Tianjin Center for Disease Control and                                                                                                                          | Low          |
| Confounding                 | Adjusted for long-term trends, seasonality, temperature, relative humidity, and the day of the week.                                                                                                                                                                                                   | Low          |
| Selection                   | Study collected mortality data from six urban districts in Tianjin from 1 January 2001 and 31 December 2010. Daily mortality data regarding respiratory death (ICD-10: A00-R99) was obtained from the Death Register and Report Information System, Tianjin Center for Disease Control and Prevention. | Low          |
| Incomplete outcome data     | Daily YLL were calculated by summing the YLL for all deaths on the same day. However, any potential errors or missing data did not depend on air pollution levels.                                                                                                                                     | Low          |
| Selective outcome reporting | All pre-specified outcomes are reported                                                                                                                                                                                                                                                                | Low          |
| Conflict of interest        | The authors declare no conflicts of interest.                                                                                                                                                                                                                                                          | Low          |
| Other sources of            | No other potential sources of bias identified.                                                                                                                                                                                                                                                         | Low          |

| # 11Zhang et al. 2017       |                                                                                                                                                                                                                                                                                                                                                                                     |              |
|-----------------------------|-------------------------------------------------------------------------------------------------------------------------------------------------------------------------------------------------------------------------------------------------------------------------------------------------------------------------------------------------------------------------------------|--------------|
| Design                      | Time-series study                                                                                                                                                                                                                                                                                                                                                                   |              |
| Participants                | Deaths in 2 urban districts in Wuhan, 2009-2012                                                                                                                                                                                                                                                                                                                                     |              |
| Exposure                    | PM <sub>10</sub> , SO <sub>2</sub> , NO <sub>2</sub>                                                                                                                                                                                                                                                                                                                                |              |
| Outcomes                    | Non-accidental disease, cardiovascular disease, respiratory disease, stroke,                                                                                                                                                                                                                                                                                                        |              |
| Risk of Bias Assessment     |                                                                                                                                                                                                                                                                                                                                                                                     |              |
| Bias Domain                 | Criterion supportive response                                                                                                                                                                                                                                                                                                                                                       | Judgment     |
| Exposure Assessment         | -The daily concentration of PM <sub>10</sub> during 2009-2012 was collected from the Wuhan Environmental Monitoring Center.<br><br>-Daily concentrations were collected from two urban districts.<br><br>-No information about the missing data of daily average                                                                                                                    | Probably low |
| Outcome Assessment          | Daily mortality data from January 1, 2009 through December 31, 2012 were obtained from the Hubei Provincial Center for Disease Control and Prevention. Causes of death were coded according to the ICD-10. Daily non-accidental death cases (ICD-10: A00-R99) were included in databases, and were divided into several mortality categories: cardiovascular (I00-I99), respiratory | Low          |
| Confounding                 | Adjusted for long-term trends, seasonality, temperature, relative humidity, barometric pressure, the day of the week                                                                                                                                                                                                                                                                | Low          |
| Selection                   | Daily mortality data from January 1, 2009 through December 31, 2012 were obtained from the Hubei Provincial Center for Disease Control and Prevention. Daily non-accidental death cases (ICD-10: A00-R99) were                                                                                                                                                                      | Low          |
| Incomplete outcome data     | Daily YLLs could be consequently obtained by summing the YLL of all death cases on that day. However, any potential errors or missing data did not depend on air                                                                                                                                                                                                                    | Low          |
| Selective outcome reporting | All pre-specified outcomes are reported                                                                                                                                                                                                                                                                                                                                             | Low          |
| Conflict of interest        | The authors declare they have no competing financial                                                                                                                                                                                                                                                                                                                                | Low          |
| Other sources of            | No other potential sources of bias identified.                                                                                                                                                                                                                                                                                                                                      | Low          |

| # 12Zhu et al. 2017         |                                                                                                                                                                                                                                                                                                                                                                                                                                                               |              |
|-----------------------------|---------------------------------------------------------------------------------------------------------------------------------------------------------------------------------------------------------------------------------------------------------------------------------------------------------------------------------------------------------------------------------------------------------------------------------------------------------------|--------------|
| Design                      | Time-series study                                                                                                                                                                                                                                                                                                                                                                                                                                             |              |
| Participants                | Deaths in Wuxi, 2012-2015                                                                                                                                                                                                                                                                                                                                                                                                                                     |              |
| Exposure                    | PM <sub>2.5</sub> , PM <sub>10</sub> , SO <sub>2</sub> , NO <sub>2</sub>                                                                                                                                                                                                                                                                                                                                                                                      |              |
| Outcomes                    | Non-accidental disease, cardiovascular disease, respiratory disease, diabetes                                                                                                                                                                                                                                                                                                                                                                                 |              |
| Risk of Bias Assessment     |                                                                                                                                                                                                                                                                                                                                                                                                                                                               |              |
| Bias Domain                 | Criterion supportive response                                                                                                                                                                                                                                                                                                                                                                                                                                 | Judgment     |
| Exposure Assessment         | -In this study, the data of air pollutants were simultaneously collected from seven state-controlled monitoring stations distributed in different administrative districts of Wuxi from 2012-2015.<br><br>-The data from monitoring sites were obtained from the Wuxi Municipal Environmental Monitoring Center and averaged to calculate the daily 24-h mean concentration of each pollutant.<br><br>-No information about the missing data of daily average | Probably low |
| Outcome Assessment          | Daily mortality data from 1 January 2012 to 31 December 2015 were collected from the database of the Wuxi Center for Disease Control and Prevention.The data in this study were coded according to ICD-10 and further classified into deaths because of non-accidental causes (A00-A99), cardiovascular diseases (I00-I99), respiratory diseases (J00-J98) and diabetes                                                                                       | Low          |
| Confounding                 | Adjusted for time, temperature, relative humidity, and the day                                                                                                                                                                                                                                                                                                                                                                                                | Low          |
| Selection                   | Daily mortality data from 1 January 2012 to 31 December 2015 were collected from the database of the Wuxi Center for Disease Control and Prevention.                                                                                                                                                                                                                                                                                                          | Low          |
| Incomplete outcome data     | YLL values were calculated for each individual death by matching the age and sex to the life tables and were then summed to yield the YLL corresponding to each day.<br><br>However, any potential errors or missing data did not depend                                                                                                                                                                                                                      | Low          |
| Selective outcome reporting | All pre-specified outcomes are reported                                                                                                                                                                                                                                                                                                                                                                                                                       | Low          |
| Conflict of interest        | No potential conflicts of interest were declared.                                                                                                                                                                                                                                                                                                                                                                                                             | Low          |
| Other sources of            | No other potential sources of bias identified.                                                                                                                                                                                                                                                                                                                                                                                                                | Low          |

| # 13Huang et al. 2018a      |                                                                                                                                                                                                                                                                                                                                                                                         |              |
|-----------------------------|-----------------------------------------------------------------------------------------------------------------------------------------------------------------------------------------------------------------------------------------------------------------------------------------------------------------------------------------------------------------------------------------|--------------|
| Design                      | Time-series study                                                                                                                                                                                                                                                                                                                                                                       |              |
| Participants                | Deaths of ischemic heart deaths in Ningbo, 2011-2015                                                                                                                                                                                                                                                                                                                                    |              |
| Exposure                    | PM <sub>2.5</sub> , SO <sub>2</sub> , NO <sub>2</sub>                                                                                                                                                                                                                                                                                                                                   |              |
| Outcomes                    | Ischemic heart disease                                                                                                                                                                                                                                                                                                                                                                  |              |
| Risk of Bias Assessment     |                                                                                                                                                                                                                                                                                                                                                                                         |              |
| Bias Domain                 | Criterion supportive response                                                                                                                                                                                                                                                                                                                                                           | Judgment     |
| Exposure Assessment         | -The daily concentrations of air pollutants were collected from the Environment Monitoring Center of Ningbo between Jan 1 <sup>st</sup> 2011 and December 31 <sup>st</sup> 2015.<br><br>-The air pollutants were monitored consecutively at eight monitoring sites, which cover eleven districts and counties in Ningbo.<br><br>-No information about the missing data of daily average | Probably low |
| Outcome Assessment          | Daily IHD mortality data from 2011 to 2015 were obtained from Ningbo Municipal Center for Disease Control and Prevention. ICD-10: I20-I25 was used as the identifying                                                                                                                                                                                                                   | Low          |
| Confounding                 | Adjusted for long-term trends, temperature, relative humidity, the day of the week. Seasonality was not included.                                                                                                                                                                                                                                                                       | Probably low |
| Selection                   | Study included all IHD deaths that occurred from 2011 to                                                                                                                                                                                                                                                                                                                                | Low          |
| Incomplete outcome data     | Daily YLL were calculated by summing the YLL for all the individuals who died from IHD on the same day.However, any potential errors or missing data did not depend on air                                                                                                                                                                                                              | Low          |
| Selective outcome reporting | All pre-specified outcomes are reported                                                                                                                                                                                                                                                                                                                                                 | Low          |
| Conflict of interest        | The authors declare no conflicts of interest.                                                                                                                                                                                                                                                                                                                                           | Low          |
| Other sources of            | No other potential sources of bias identified.                                                                                                                                                                                                                                                                                                                                          | Low          |

| # 14Huang et al. 2018b      |                                                                                                                                                                                                                                                                                                                     |              |
|-----------------------------|---------------------------------------------------------------------------------------------------------------------------------------------------------------------------------------------------------------------------------------------------------------------------------------------------------------------|--------------|
| Design                      | Time-series study                                                                                                                                                                                                                                                                                                   |              |
| Participants                | Deaths of chronic obstructive pulmonary disease in Ningbo, 2011-2015                                                                                                                                                                                                                                                |              |
| Exposure                    | O <sub>3</sub>                                                                                                                                                                                                                                                                                                      |              |
| Outcomes                    | Chronic obstructive pulmonary disease                                                                                                                                                                                                                                                                               |              |
| Risk of Bias Assessment     |                                                                                                                                                                                                                                                                                                                     |              |
| Bias Domain                 | Criterion supportive response                                                                                                                                                                                                                                                                                       | Judgment     |
| Exposure Assessment         | -The daily air pollution data from Jan 1 <sup>st</sup> 2011 to Dec 31 <sup>st</sup> 2015 were obtained from the Environment Monitoring Center of Ningbo.<br><br>-There are 8 monitoring sites that cover all districts and counties in Ningbo.<br><br>-The daily concentration of each air pollutant was calculated | Probably low |
| Outcome Assessment          | Daily COPD mortality data during the same period were collected from the Ningbo Municipal Center for Disease Control and Prevention. COPD deaths were identified                                                                                                                                                    | Low          |
| Confounding                 | Adjusted for long-term trends, seasonality, temperature, relative humidity, and the day of the week.                                                                                                                                                                                                                | Low          |
| Selection                   | Daily COPD mortality data during the same period were collected from the Ningbo Municipal Center for Disease Control and Prevention.Daily death count was defined as the number of deaths occurring on a single day, and the data was                                                                               | Low          |
| Incomplete outcome data     | The daily YLL was calculated. However, any potential errors or missing data did not depend on air pollution levels.                                                                                                                                                                                                 | Low          |
| Selective outcome reporting | All pre-specified outcomes are reported                                                                                                                                                                                                                                                                             | Low          |
| Conflict of interest        | The authors declared that they have no competing interests.                                                                                                                                                                                                                                                         | Low          |
| Other sources of            | No other potential sources of bias identified.                                                                                                                                                                                                                                                                      | Low          |

| # 15Liang et al. 2018       |                                                                                                                                                                                                                                                                                                                                                                                                                                                                                                                                                                                                                                                                              |              |
|-----------------------------|------------------------------------------------------------------------------------------------------------------------------------------------------------------------------------------------------------------------------------------------------------------------------------------------------------------------------------------------------------------------------------------------------------------------------------------------------------------------------------------------------------------------------------------------------------------------------------------------------------------------------------------------------------------------------|--------------|
| Design                      | Time-series study                                                                                                                                                                                                                                                                                                                                                                                                                                                                                                                                                                                                                                                            |              |
| Participants                | Deaths of acute myocardial infraction in Hong Kong, 2011-2015                                                                                                                                                                                                                                                                                                                                                                                                                                                                                                                                                                                                                |              |
| Exposure                    | PM <sub>2.5</sub> , SO <sub>2</sub> , NO <sub>2</sub> , O <sub>3</sub>                                                                                                                                                                                                                                                                                                                                                                                                                                                                                                                                                                                                       |              |
| Outcomes                    | Acute myocardial infraction disease                                                                                                                                                                                                                                                                                                                                                                                                                                                                                                                                                                                                                                          |              |
| Risk of Bias Assessment     |                                                                                                                                                                                                                                                                                                                                                                                                                                                                                                                                                                                                                                                                              |              |
| Bias Domain                 | Criterion supportive response                                                                                                                                                                                                                                                                                                                                                                                                                                                                                                                                                                                                                                                | Judgment     |
| Exposure Assessment         | -Hourly monitoring data for PM <sub>2.5</sub> , SO <sub>2</sub> , NO <sub>2</sub> , O <sub>3</sub> in 14 monitoring stations were collected by the Hong Kong Environmental Protection Department from 2011 to 2015. 10 general stations data was used to represent the general population exposure on a regular basis, after excluding three roadside stations and one general station on a remote island.<br><br>-The 24 hours mean concentrations were calculated for each station first and then average over ten stations were calculated to represent the daily exposure levels of the whole population.<br><br>-No information about the missing data of daily average | Probably low |
| Outcome Assessment          | Daily data on mortality due to AMI in Hong Kong from January 1, 2011 to December 31, 2015 were obtained from Hong Kong Census and Statistics Department. The death cause was coded according to ICD-10. In the study, the daily mortality count from AMI (I121) was abstracted.                                                                                                                                                                                                                                                                                                                                                                                              | Low          |
| Confounding                 | Adjusted for long-term trends, seasonality, temperature, relative humidity, the day of the week and public holidays.                                                                                                                                                                                                                                                                                                                                                                                                                                                                                                                                                         | Low          |
| Selection                   | Study included all AMI deaths in Hong Kong from January 1, 2011 to December 31, 2015.                                                                                                                                                                                                                                                                                                                                                                                                                                                                                                                                                                                        | Low          |
| Incomplete outcome data     | Daily total YLL were calculated as the sum of YLL of all deaths due to AMI on the same day. However, any potential errors or missing data did not depend on air pollution levels.                                                                                                                                                                                                                                                                                                                                                                                                                                                                                            | Low          |
| Selective outcome reporting | All pre-specified outcomes are reported                                                                                                                                                                                                                                                                                                                                                                                                                                                                                                                                                                                                                                      | Low          |
| Conflict of interest        | No potential conflicts of interest were declared.                                                                                                                                                                                                                                                                                                                                                                                                                                                                                                                                                                                                                            | Low          |
| Other sources of            | No other potential sources of bias identified.                                                                                                                                                                                                                                                                                                                                                                                                                                                                                                                                                                                                                               | Low          |

| # 16Zeng et al. 2018a       |                                                                                                                                                                                                                                                                 |              |
|-----------------------------|-----------------------------------------------------------------------------------------------------------------------------------------------------------------------------------------------------------------------------------------------------------------|--------------|
| Design                      | Time-series study                                                                                                                                                                                                                                               |              |
| Participants                | Deaths of cardiovascular disease in Tianjin, 2001-2010                                                                                                                                                                                                          |              |
| Exposure                    | PM <sub>10</sub>                                                                                                                                                                                                                                                |              |
| Outcomes                    | Cardiovascular disease, ischemic heart disease, stroke                                                                                                                                                                                                          |              |
| Risk of Bias Assessment     |                                                                                                                                                                                                                                                                 |              |
| Bias Domain                 | Criterion supportive response                                                                                                                                                                                                                                   | Judgment     |
| Exposure Assessment         | -The data on daily mean concentrations of PM <sub>10</sub> from January 1, 2001 to December 31, 2010 was collected from the Tianjin Environmental Monitoring center.<br><br>-No information about the missing data of daily average concentration was reported. | Probably low |
| Outcome Assessment          | Daily mortality data were obtained from the Tianjin Center for Disease Control and Prevention. Causes of death were coded according to the ICD-10 (cardiovascular disease: I00-I99, ischemic heart disease: I60-I69, stroke: I20-I25).                          | Low          |
| Confounding                 | Adjusted for time, temperature, relative humidity and the                                                                                                                                                                                                       | Low          |
| Selection                   | Study included all cardiovascular disease deaths that occurred between 1 January 2001 and 31 December 2010.                                                                                                                                                     | Low          |
| Incomplete outcome data     | Daily YLL were calculated by summing the YLL for all deaths on that day. However, any potential errors or missing data did not depend on air pollution levels.                                                                                                  | Low          |
| Selective outcome reporting | All pre-specified outcomes are reported                                                                                                                                                                                                                         | Low          |
| Conflict of interest        | No potential conflicts of interest were declared.                                                                                                                                                                                                               | Low          |
| Other sources of            | No other potential sources of bias identified.                                                                                                                                                                                                                  | Low          |

| # 17Zeng et al. 2018b       |                                                                                                                                                                                                                                                                                                                                                                                                        |          |
|-----------------------------|--------------------------------------------------------------------------------------------------------------------------------------------------------------------------------------------------------------------------------------------------------------------------------------------------------------------------------------------------------------------------------------------------------|----------|
| Design                      | Time-series study                                                                                                                                                                                                                                                                                                                                                                                      |          |
| Participants                | Deaths of chronic obstructive pulmonary disease in 6 urban districts in Tianjin, 2001-2010                                                                                                                                                                                                                                                                                                             |          |
| Exposure                    | PM <sub>10</sub>                                                                                                                                                                                                                                                                                                                                                                                       |          |
| Outcomes                    | Chronic obstructive pulmonary disease                                                                                                                                                                                                                                                                                                                                                                  |          |
| Risk of Bias Assessment     |                                                                                                                                                                                                                                                                                                                                                                                                        |          |
| Bias Domain                 | Criterion supportive response                                                                                                                                                                                                                                                                                                                                                                          | Judgment |
| Exposure Assessment         | -The daily air pollutant monitoring data were obtained from Tianjin Environmental Monitoring center.<br><br>-There were six monitoring stations in urban areas, as for the calculation of daily average concentrations of air pollutants; at least 75% of the 1-h values must be available on that particular day.<br><br>-The percentage of missing data regarding air pollutants was less than 0.5%. | Low      |
| Outcome Assessment          | The daily mortality data on COPD deaths were obtained from the Death Register and Report Information System, Tianjin Centers for Disease Control and Prevention. Based on the ICD-10, COPD was coded J41-J44.                                                                                                                                                                                          | Low      |
| Confounding                 | Adjusted for long-term trends, seasonality, temperature, relative humidity and the day of the week.                                                                                                                                                                                                                                                                                                    | Low      |
| Selection                   | Study included all COPD deaths that occurred between 1 January 2001 and 31 December 2010.                                                                                                                                                                                                                                                                                                              | Low      |
| Incomplete outcome data     | Daily YLL were calculated by summing the YLL for all deaths on that day. However, any potential errors or missing data did not depend on air pollution levels.                                                                                                                                                                                                                                         | Low      |
| Selective outcome reporting | All pre-specified outcomes are reported                                                                                                                                                                                                                                                                                                                                                                | Low      |
| Conflict of interest        | No potential conflicts of interest were declared.                                                                                                                                                                                                                                                                                                                                                      | Low      |
| Other sources of            | No other potential sources of bias identified.                                                                                                                                                                                                                                                                                                                                                         | Low      |

| # 18Li et al. 2019          |                                                                                                                                                                                                            |              |
|-----------------------------|------------------------------------------------------------------------------------------------------------------------------------------------------------------------------------------------------------|--------------|
| Design                      | Time-series study                                                                                                                                                                                          |              |
| Participants                | Deaths of cardiovascular disease in Changping district in Beijing, 2014-2017                                                                                                                               |              |
| Exposure                    | PM <sub>2.5</sub>                                                                                                                                                                                          |              |
| Outcomes                    | Cardiovascular disease                                                                                                                                                                                     |              |
| Risk of Bias Assessment     |                                                                                                                                                                                                            |              |
| Bias Domain                 | Criterion supportive response                                                                                                                                                                              | Judgment     |
| Exposure Assessment         | -The daily data on PM <sub>2.5</sub> for 2014-2017 was provided by the Environmental Protection Department of Changping district in Beijing<br><br>-No information about the missing data of daily average | Probably low |
| Outcome Assessment          | Daily mortality data were collected by researcher. Causes of death were coded according to the ICD-10 (I00-I99).                                                                                           | Probably low |
| Confounding                 | Adjusted for long-term trends, temperature, relative humidity, air pressure, the day of the week and public holidays.                                                                                      | Probably low |
| Selection                   | Study included all cardiovascular disease deaths that occurred between 2014 and 2017.                                                                                                                      | Low          |
| Incomplete outcome data     | Daily YLL were calculated by summing the YLL for all deaths on that day. However, any potential errors or missing data did not depend on air pollution levels.                                             | Low          |
| Selective outcome reporting | All pre-specified outcomes are reported                                                                                                                                                                    | Low          |
| Conflict of interest        | No potential conflicts of interest were declared.                                                                                                                                                          | Low          |
| Other sources of            | No other potential sources of bias identified.                                                                                                                                                             | Low          |

| # 19Zeng et al. 2019        |                                                                                                                                                                                                                                                                                                                                                                                                                                                     |          |
|-----------------------------|-----------------------------------------------------------------------------------------------------------------------------------------------------------------------------------------------------------------------------------------------------------------------------------------------------------------------------------------------------------------------------------------------------------------------------------------------------|----------|
| Design                      | Time-series study                                                                                                                                                                                                                                                                                                                                                                                                                                   |          |
| Participants                | Deaths in 6 urban districts in Tianjin, 2001-2010                                                                                                                                                                                                                                                                                                                                                                                                   |          |
| Exposure                    | PM <sub>10</sub>                                                                                                                                                                                                                                                                                                                                                                                                                                    |          |
| Outcomes                    | Non-accidental disease, cardiovascular disease, respiratory disease                                                                                                                                                                                                                                                                                                                                                                                 |          |
| Risk of Bias Assessment     |                                                                                                                                                                                                                                                                                                                                                                                                                                                     |          |
| Bias Domain                 | Criterion supportive response                                                                                                                                                                                                                                                                                                                                                                                                                       | Judgment |
| Exposure Assessment         | -The daily concentrations of PM <sub>10</sub> between January 1, 2001 and December 31, 2010 were obtained from the Tianjin Environmental Monitoring center.<br><br>-The daily concentrations were calculated as the daily average values of the monitoring data from the city central air-monitoring sites of each district, each district has one central air-monitoring site.<br><br>-The percentage of missing data regarding air pollutants was | Low      |
| Outcome Assessment          | The death monitoring data during 2001-2010 was collected from Tianjin Centers for Disease Control and Prevention.<br><br>The causes of deaths were classified and coded according to the ICD-10, as non-accidental disease (A00-A99), cardiovascular disease (I00-I99), respiratory disease                                                                                                                                                         | Low      |
| Confounding                 | Adjusted for long-term trends, seasonality, temperature, relative humidity, and the day of the week.                                                                                                                                                                                                                                                                                                                                                | Low      |
| Selection                   | Study included all non-accidental deaths that occurred between 1 January 2001 and 31 December 2010.                                                                                                                                                                                                                                                                                                                                                 | Low      |
| Incomplete outcome data     | Daily YLL were calculated by summing the YLL for all deaths on that day. However, any potential errors or missing data did not depend on air pollution levels.                                                                                                                                                                                                                                                                                      | Low      |
| Selective outcome reporting | All pre-specified outcomes are reported                                                                                                                                                                                                                                                                                                                                                                                                             | Low      |
| Conflict of interest        | The authors declare that they have no conflict of interest.                                                                                                                                                                                                                                                                                                                                                                                         | Low      |
| Other sources of            | No other potential sources of bias identified.                                                                                                                                                                                                                                                                                                                                                                                                      | Low      |

|                    | Exposure          |                  |                 |                 |                | Health outcomes of YLL |    |     |      |     |        |     |                   | Health outcome classified standard |        | Quality of exposure measurements      |                                       | Adjustments factors |                   |                  |             |             |               | Quality assessment results |             |
|--------------------|-------------------|------------------|-----------------|-----------------|----------------|------------------------|----|-----|------|-----|--------|-----|-------------------|------------------------------------|--------|---------------------------------------|---------------------------------------|---------------------|-------------------|------------------|-------------|-------------|---------------|----------------------------|-------------|
|                    | PM <sub>2.5</sub> | PM <sub>10</sub> | SO <sub>2</sub> | NO <sub>2</sub> | O <sub>3</sub> | Non-accidental disease | RD | CVD | COPD | IHD | Stroke | AMI | Diabetes mellitus | ICD10                              | Others | daily with less than 25% missing data | daily with more than 25% missing data | Temperature         | Relative humidity | Long-term trends | seasonality | Day of week | Other factors | High quality               | Low quality |
| Guo et al. 2013    |                   |                  |                 |                 |                |                        |    |     |      |     |        |     |                   |                                    |        |                                       |                                       |                     |                   |                  |             |             |               |                            |             |
| Lu et al. 2015     |                   |                  |                 |                 |                |                        |    |     |      |     |        |     |                   |                                    |        |                                       |                                       |                     |                   |                  |             |             |               |                            |             |
| He et al. 2016     |                   |                  |                 |                 |                |                        |    |     |      |     |        |     |                   |                                    |        |                                       |                                       |                     |                   |                  |             |             |               |                            |             |
| Yang et al. 2016   |                   |                  |                 |                 |                |                        |    |     |      |     |        |     |                   |                                    |        |                                       |                                       |                     |                   |                  |             |             |               |                            |             |
| Chen et al. 2017   |                   |                  |                 |                 |                |                        |    |     |      |     |        |     |                   |                                    |        |                                       |                                       |                     |                   |                  |             |             |               |                            |             |
| Li et al. 2017     |                   |                  |                 |                 |                |                        |    |     |      |     |        |     |                   |                                    |        |                                       |                                       |                     |                   |                  |             |             |               |                            |             |
| Ni et al. 2017a    |                   |                  |                 |                 |                |                        |    |     |      |     |        |     |                   |                                    |        |                                       |                                       |                     |                   |                  |             |             |               |                            |             |
| Ni et al. 2017b    |                   |                  |                 |                 |                |                        |    |     |      |     |        |     |                   |                                    |        |                                       |                                       |                     |                   |                  |             |             |               |                            |             |
| Zeng et al. 2017a  |                   |                  |                 |                 |                |                        |    |     |      |     |        |     |                   |                                    |        |                                       |                                       |                     |                   |                  |             |             |               |                            |             |
| Zeng et al. 2017b  |                   |                  |                 |                 |                |                        |    |     |      |     |        |     |                   |                                    |        |                                       |                                       |                     |                   |                  |             |             |               |                            |             |
| Zhang et al. 2017  |                   |                  |                 |                 |                |                        |    |     |      |     |        |     |                   |                                    |        |                                       |                                       |                     |                   |                  |             |             |               |                            |             |
| Zhu et al. 2017    |                   |                  |                 |                 |                |                        |    |     |      |     |        |     |                   |                                    |        |                                       |                                       |                     |                   |                  |             |             |               |                            |             |
| Huang et al. 2018a |                   |                  |                 |                 |                |                        |    |     |      |     |        |     |                   |                                    |        |                                       |                                       |                     |                   |                  |             |             |               |                            |             |
| Huang et al. 2018b |                   |                  |                 |                 |                |                        |    |     |      |     |        |     |                   |                                    |        |                                       |                                       |                     |                   |                  |             |             |               |                            |             |
| Liang et al. 2018  |                   |                  |                 |                 |                |                        |    |     |      |     |        |     |                   |                                    |        |                                       |                                       |                     |                   |                  |             |             |               |                            |             |
| Zeng et al. 2018a  |                   |                  |                 |                 |                |                        |    |     |      |     |        |     |                   |                                    |        |                                       |                                       |                     |                   |                  |             |             |               |                            |             |
| Zeng et al. 2018b  |                   |                  |                 |                 |                |                        |    |     |      |     |        |     |                   |                                    |        |                                       |                                       |                     |                   |                  |             |             |               |                            |             |
| Li et al. 2019     |                   |                  |                 |                 |                |                        |    |     |      |     |        |     |                   |                                    |        |                                       |                                       |                     |                   |                  |             |             |               |                            |             |
| Zeng et al. 2019   |                   |                  |                 |                 |                |                        |    |     |      |     |        |     |                   |                                    |        |                                       |                                       |                     |                   |                  |             |             |               |                            |             |

Figure S1 Characteristics of the included studies according to quality assessments, exposure assessment, health outcomes of YLL, adjustment factors, and other characteristics. Colored grid indicated that these results were expressed by the study. High quality: the study was high quality (score=5) according to the methodological quality assessments; Low quality: the study was low quality (score<5) according to the methodological quality assessments. PM<sub>2.5</sub>: particle with aerodynamic diameter  $\leq 2.5\mu\text{m}$ ; PM<sub>10</sub>: particle with aerodynamic diameter  $\leq 2.5\mu\text{m}$ ; SO<sub>2</sub>: sulfur dioxide; NO<sub>2</sub>:

nitrogen dioxide; O<sub>3</sub>: ozone; RD: respiratory disease; CVD: cardiovascular disease; COPD: chronic obstructive pulmonary disease; AMI: acutemyocardialinfarction; IHD: Ischemic Heart Disease; ICD: International Classification of Disease.

| Study              | Key criteria        |                    |             | Other criteria |                         |                             |                      |       |
|--------------------|---------------------|--------------------|-------------|----------------|-------------------------|-----------------------------|----------------------|-------|
|                    | Exposure assessment | Outcome assessment | Confounding | Selection Bias | Incomplete outcome data | Selective outcome reporting | Conflict of interest | Other |
| Guo et al. 2013    |                     |                    |             |                |                         |                             |                      |       |
| Lu et al. 2015     |                     |                    |             |                |                         |                             |                      |       |
| He et al. 2016     |                     |                    |             |                |                         |                             |                      |       |
| Yang et al. 2016   |                     |                    |             |                |                         |                             |                      |       |
| Chen et al. 2017   |                     |                    |             |                |                         |                             |                      |       |
| Li et al. 2017     |                     |                    |             |                |                         |                             |                      |       |
| Ni et al. 2017a    |                     |                    |             |                |                         |                             |                      |       |
| Ni et al. 2017b    |                     |                    |             |                |                         |                             |                      |       |
| Zeng et al. 2017a  |                     |                    |             |                |                         |                             |                      |       |
| Zeng et al. 2017b  |                     |                    |             |                |                         |                             |                      |       |
| Zhang et al. 2017  |                     |                    |             |                |                         |                             |                      |       |
| Zhu et al. 2017    |                     |                    |             |                |                         |                             |                      |       |
| Huang et al. 2018a |                     |                    |             |                |                         |                             |                      |       |
| Huang et a. 2018b  |                     |                    |             |                |                         |                             |                      |       |
| Liang et al. 2018  |                     |                    |             |                |                         |                             |                      |       |
| Zeng et al. 2018a  |                     |                    |             |                |                         |                             |                      |       |
| Zeng et al. 2018b  |                     |                    |             |                |                         |                             |                      |       |
| Li et al 2019      |                     |                    |             |                |                         |                             |                      |       |
| Zeng et al. 2019   |                     |                    |             |                |                         |                             |                      |       |

Low

Probably low

Probably high

High

**Figure S2 Risk of bias assessment for each study**

A

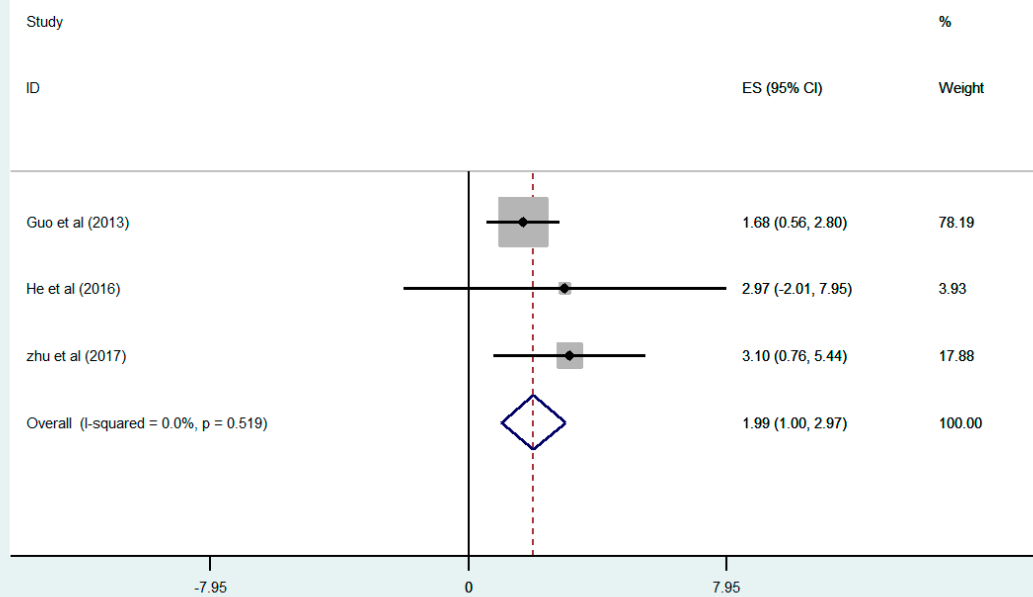

B

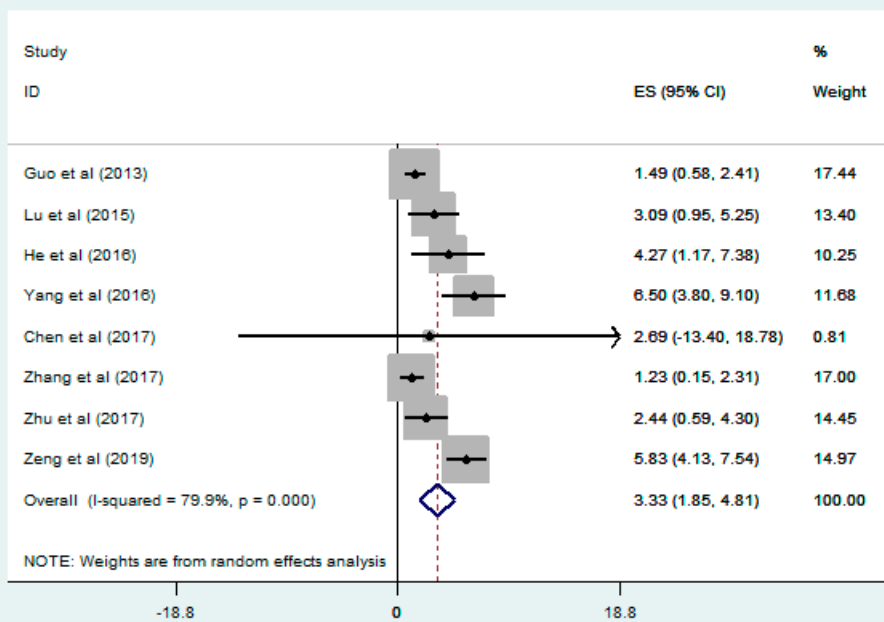

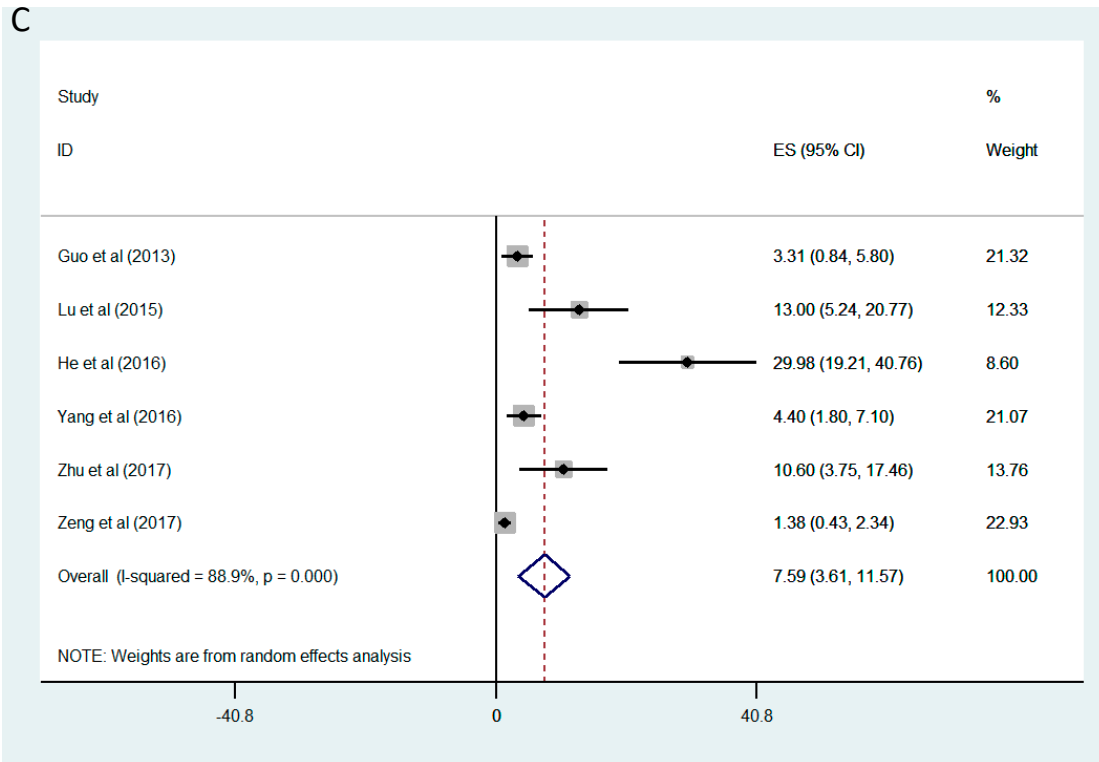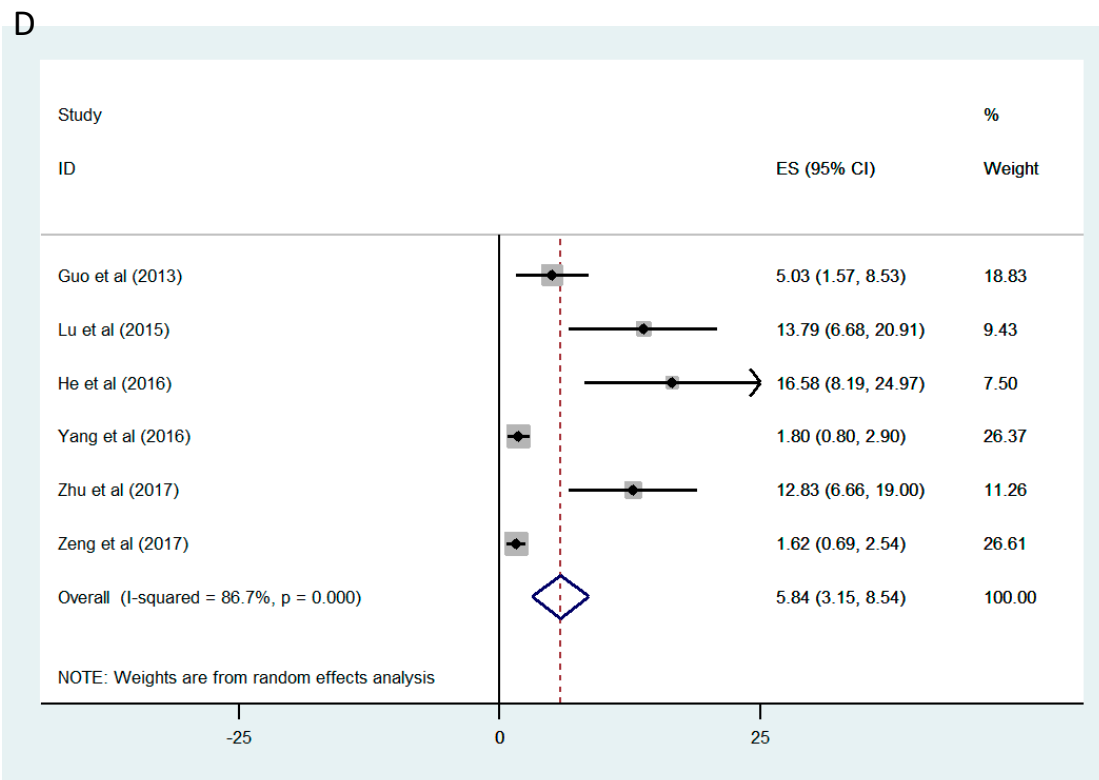

**Figure S3 Forest plot and pooled effect estimates of the ambient air pollution on the YLL of non-accidental disease. A. PM<sub>2.5</sub>; B. PM<sub>10</sub>; C. SO<sub>2</sub>; D. NO<sub>2</sub>.**

A

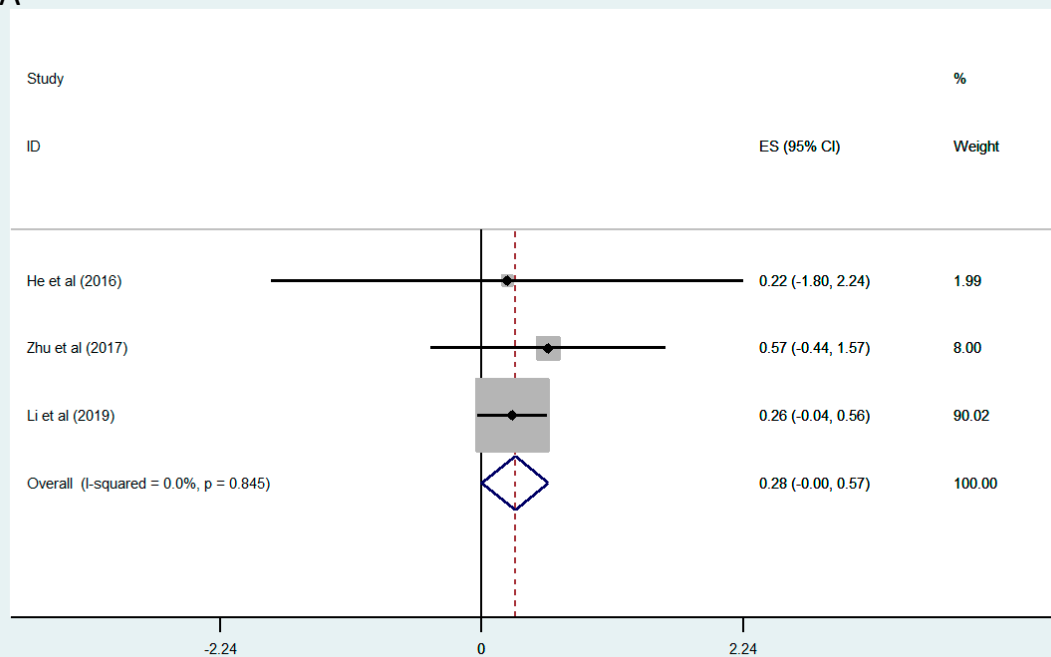

B

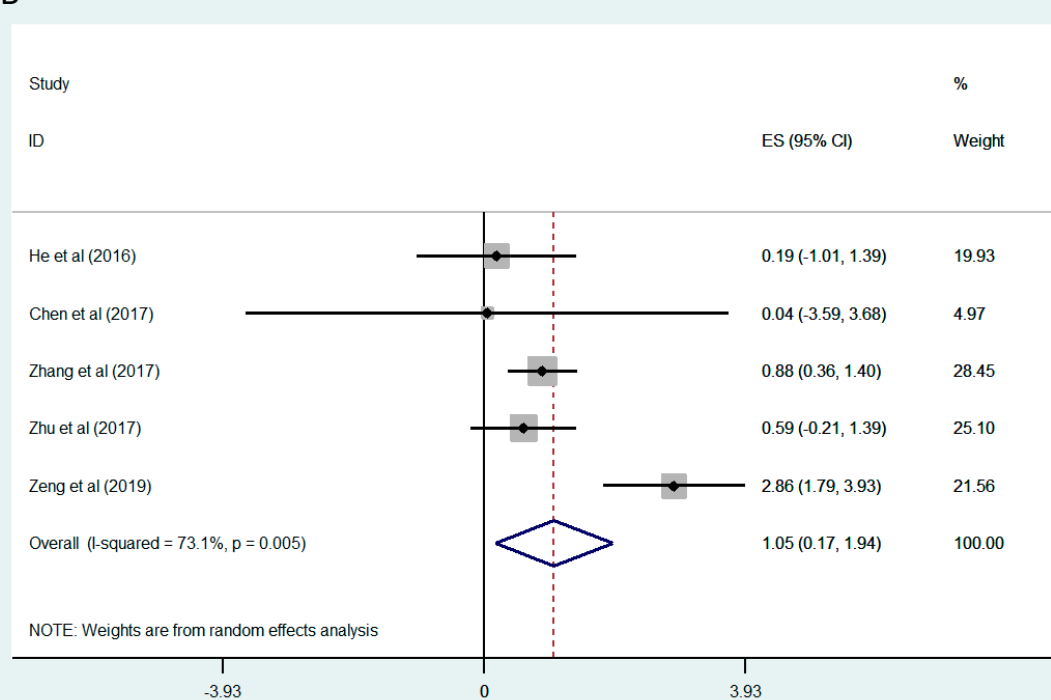

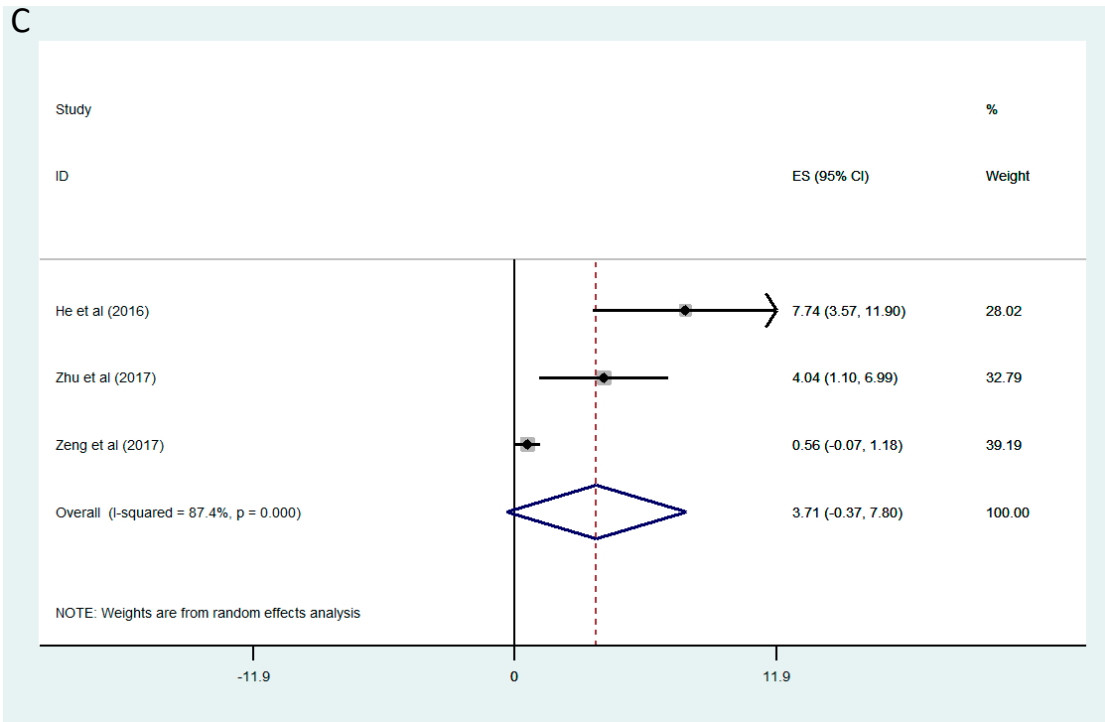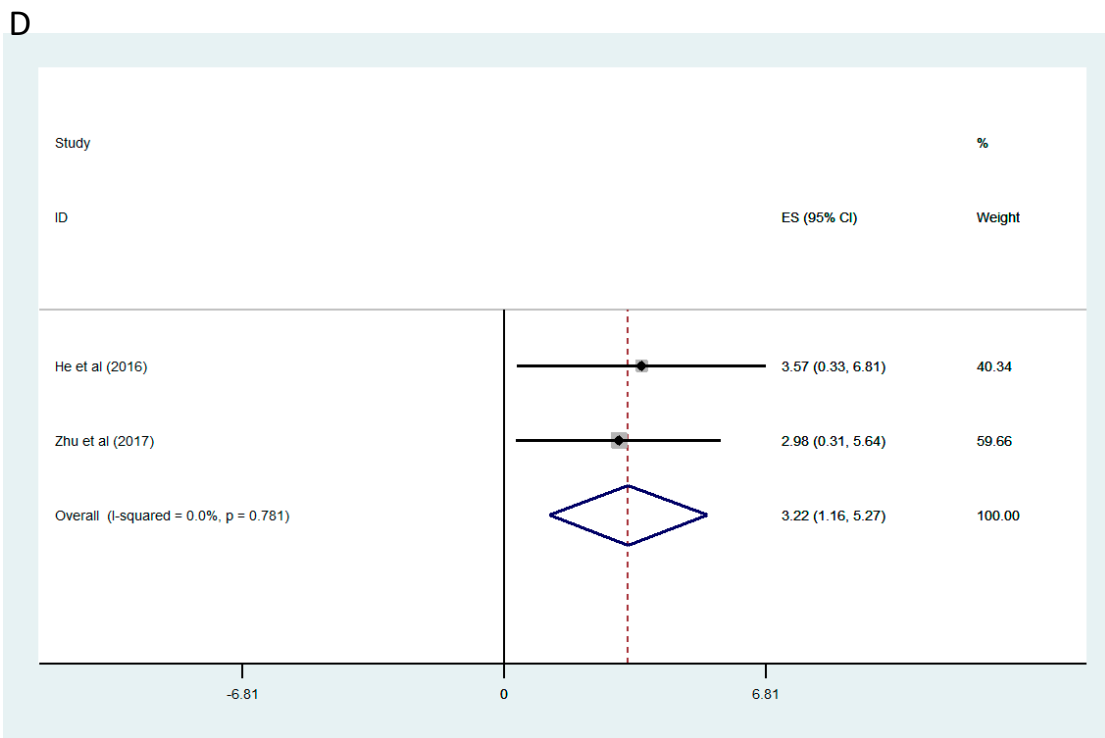

**Figure S4 Forest plot and pooled effect estimates of the ambient air pollution on the YLL of CVD. A. PM<sub>2.5</sub>; B. PM<sub>10</sub>; C. SO<sub>2</sub>; D. NO<sub>2</sub>.**

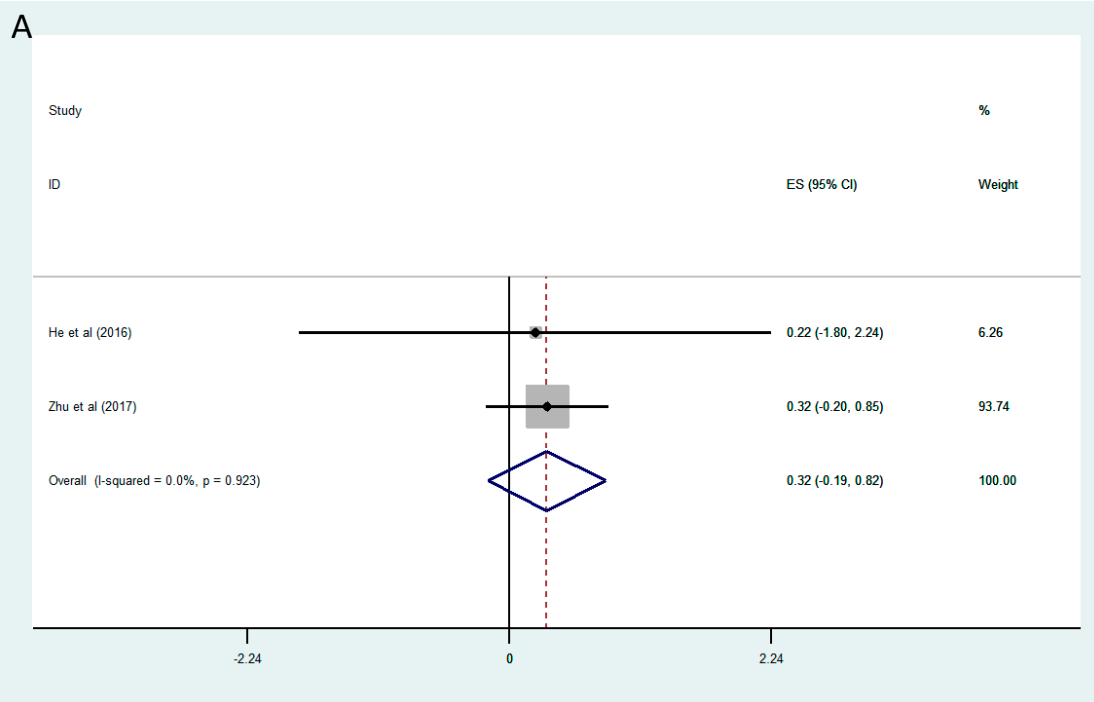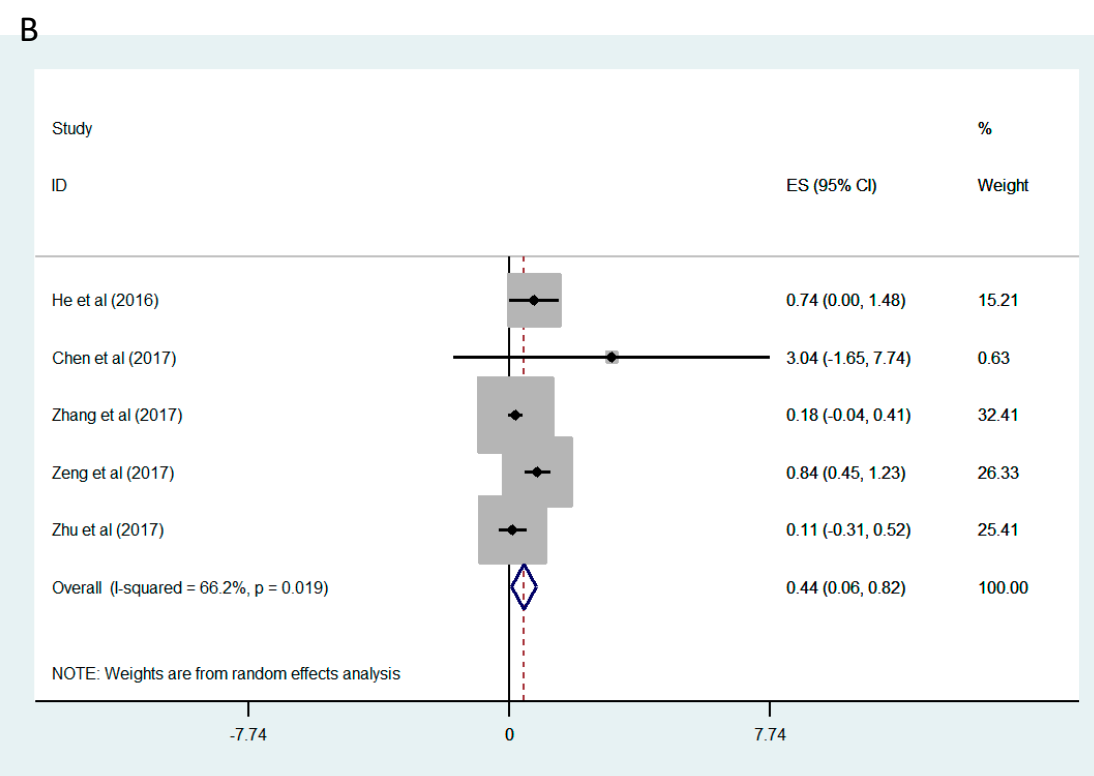

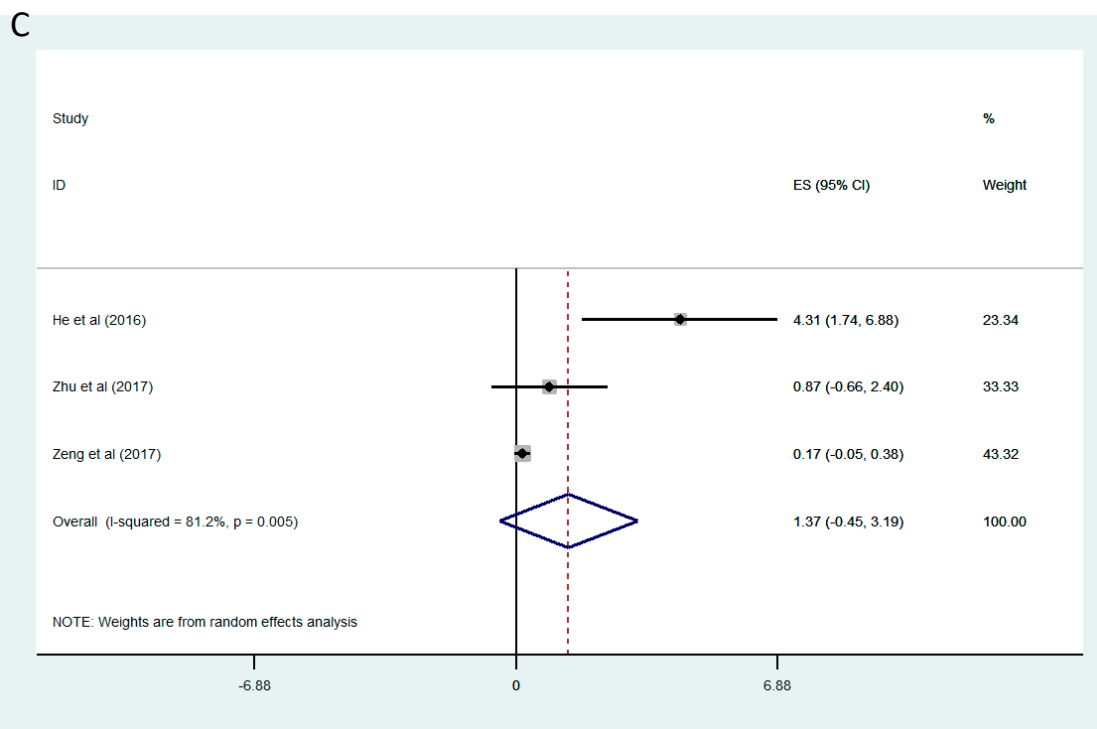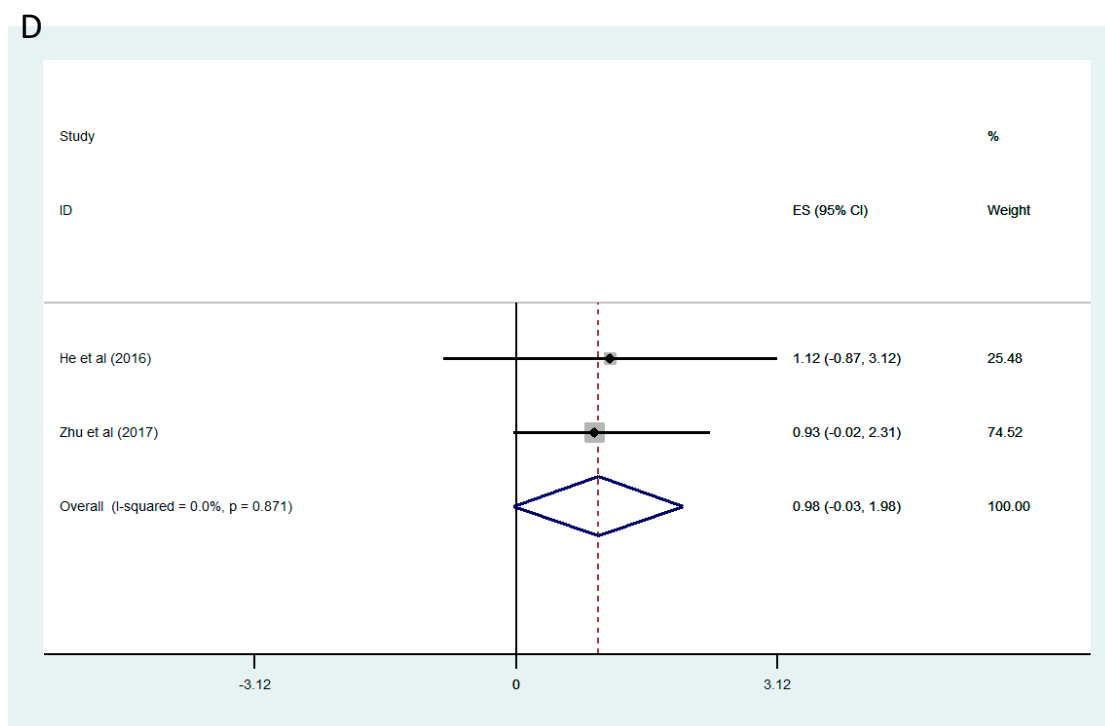

**Figure S5 Forest plot and pooled effect estimates of the ambient air pollution on the YLL of RD. A. PM<sub>2.5</sub>; B. PM<sub>10</sub>; C. SO<sub>2</sub>; D. NO<sub>2</sub>.**

A

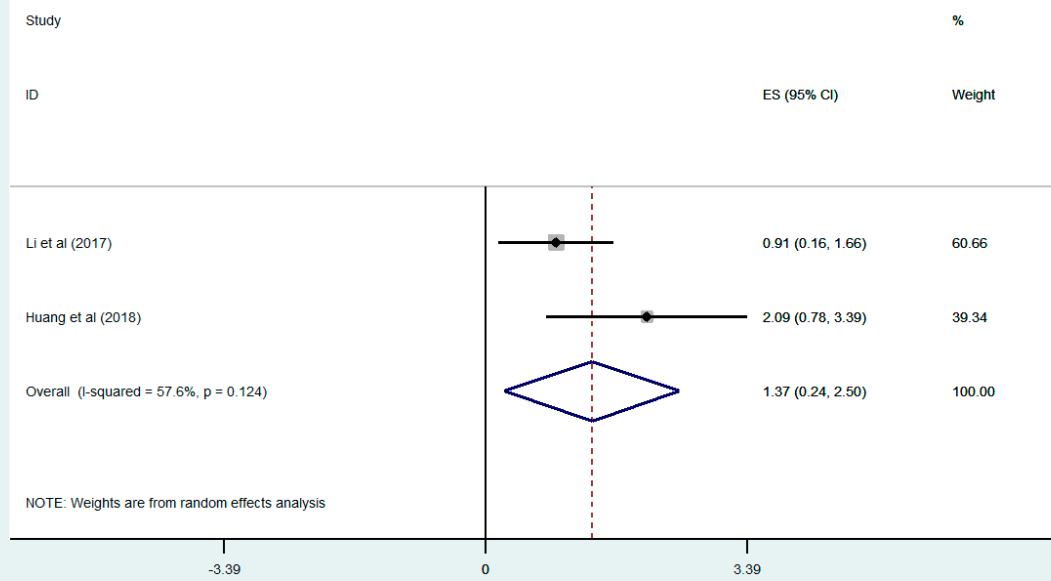

B

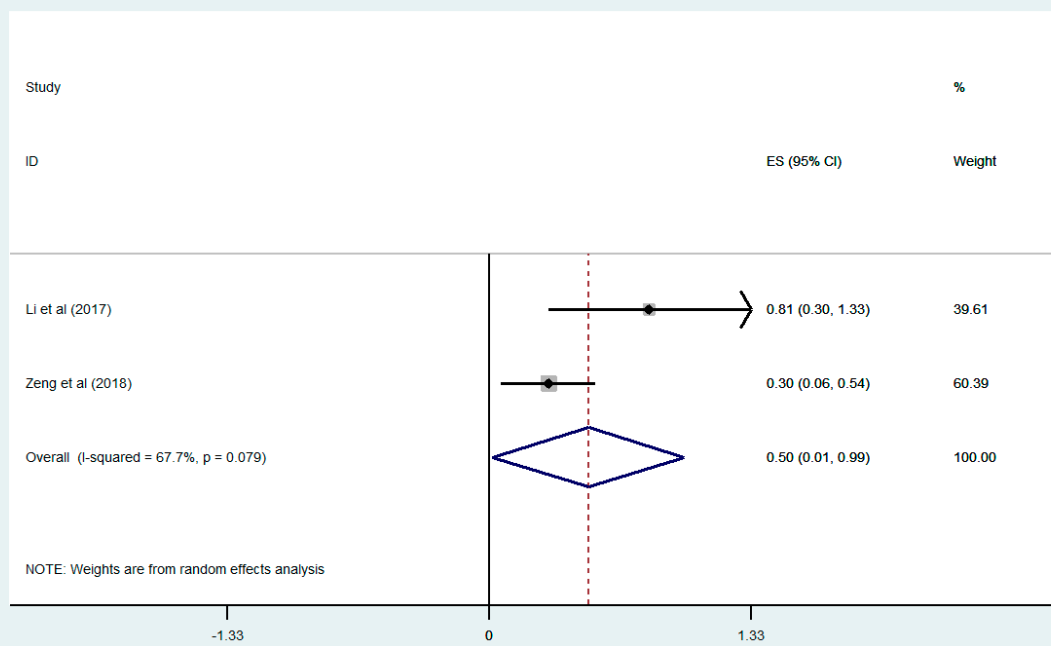

C

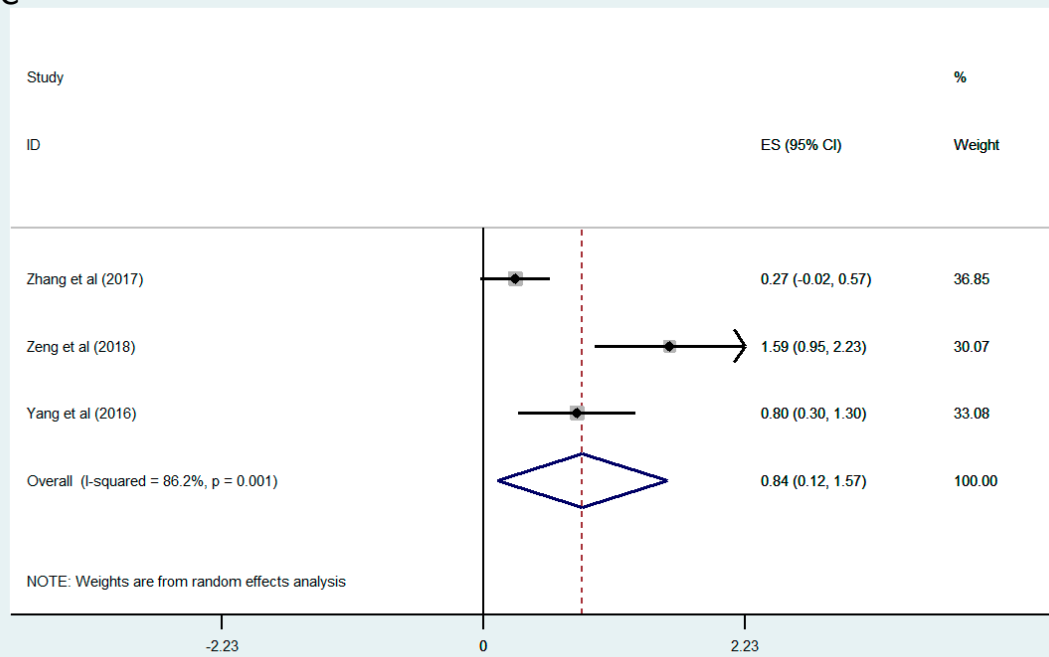

D

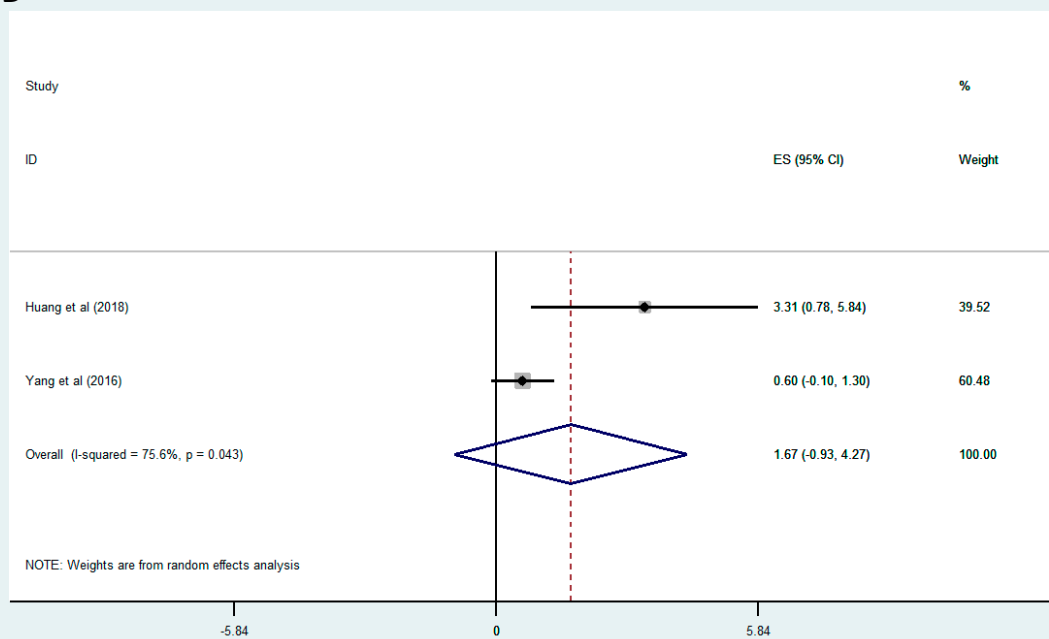

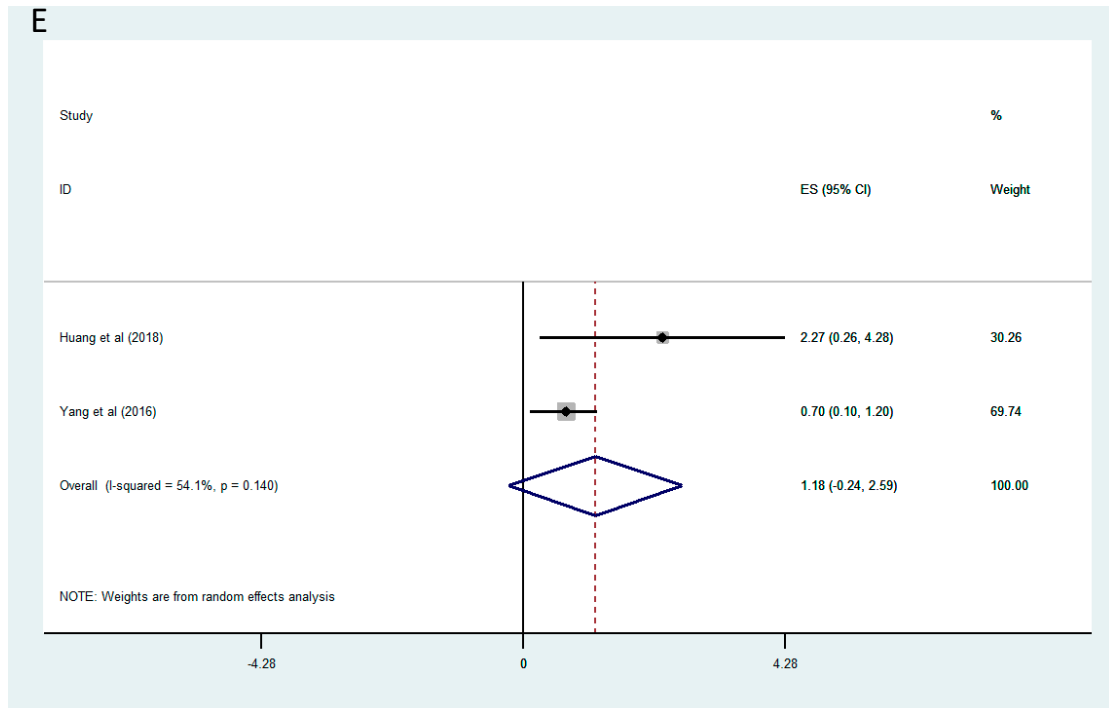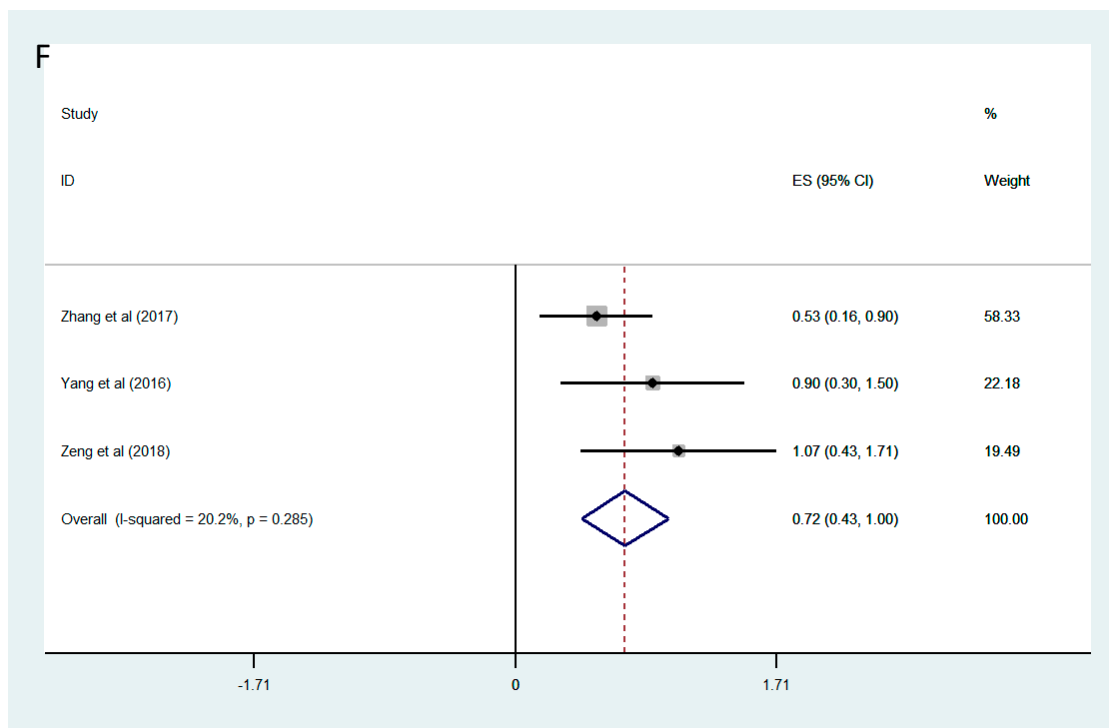

**Figure S6 Forest plot and pooled effect estimates of the ambient air pollution on the YLL of other diseases. A. PM<sub>2.5</sub> and COPD; B. PM<sub>10</sub> and COPD; C. PM<sub>10</sub> and IHD; D. SO<sub>2</sub> and IHD; E. NO<sub>2</sub> and IHD; F. PM<sub>10</sub> and stroke.**

A

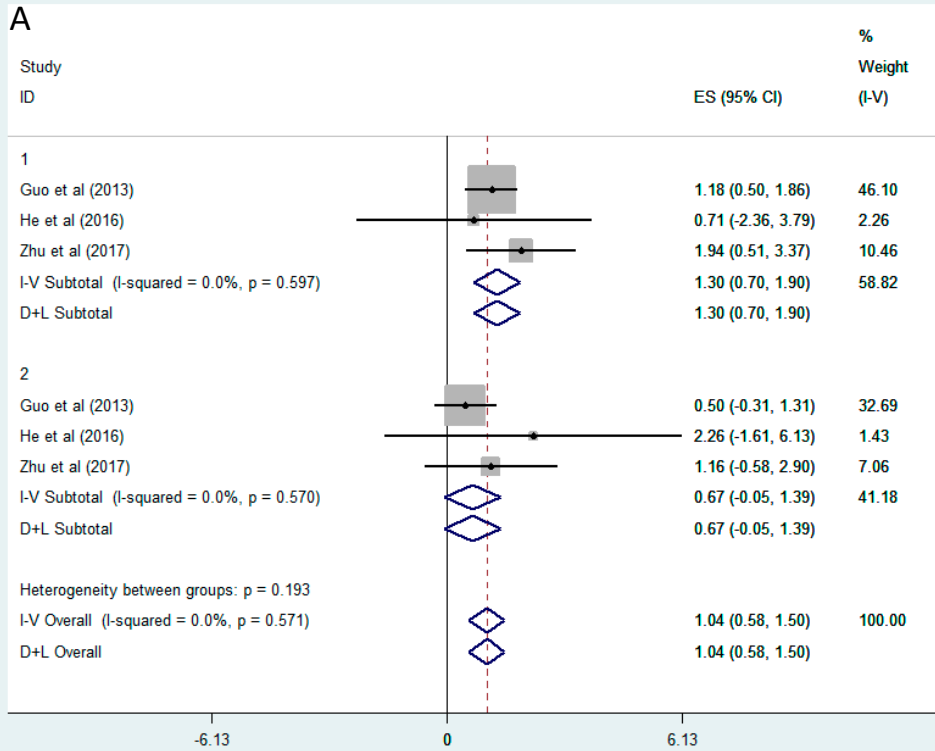

B

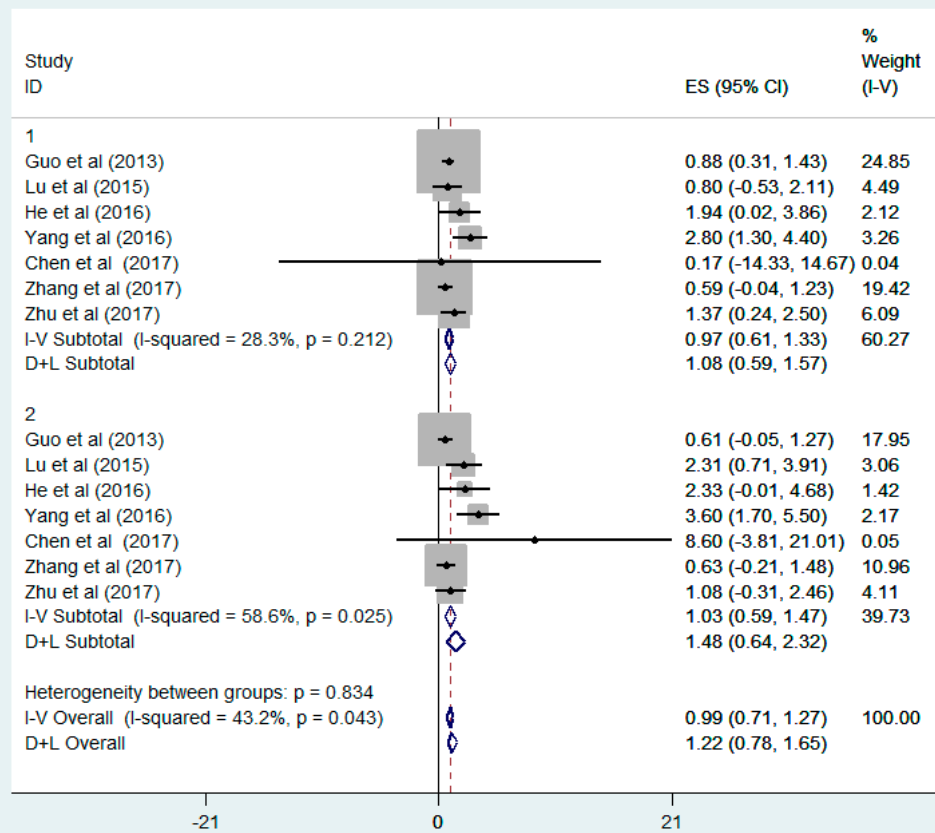

C

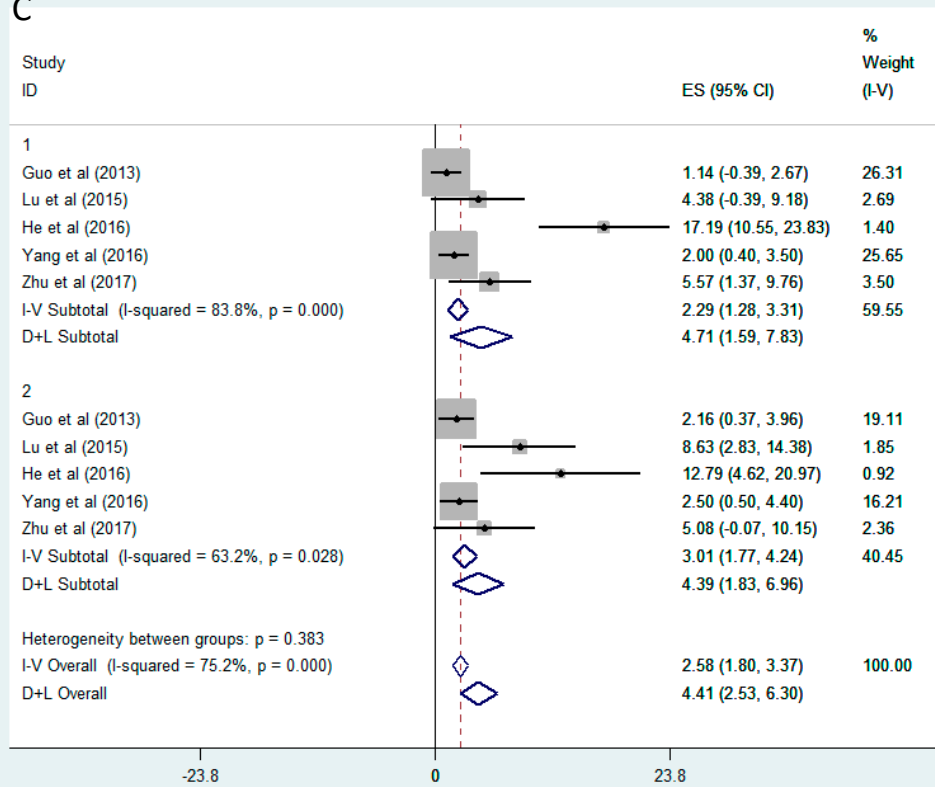

D

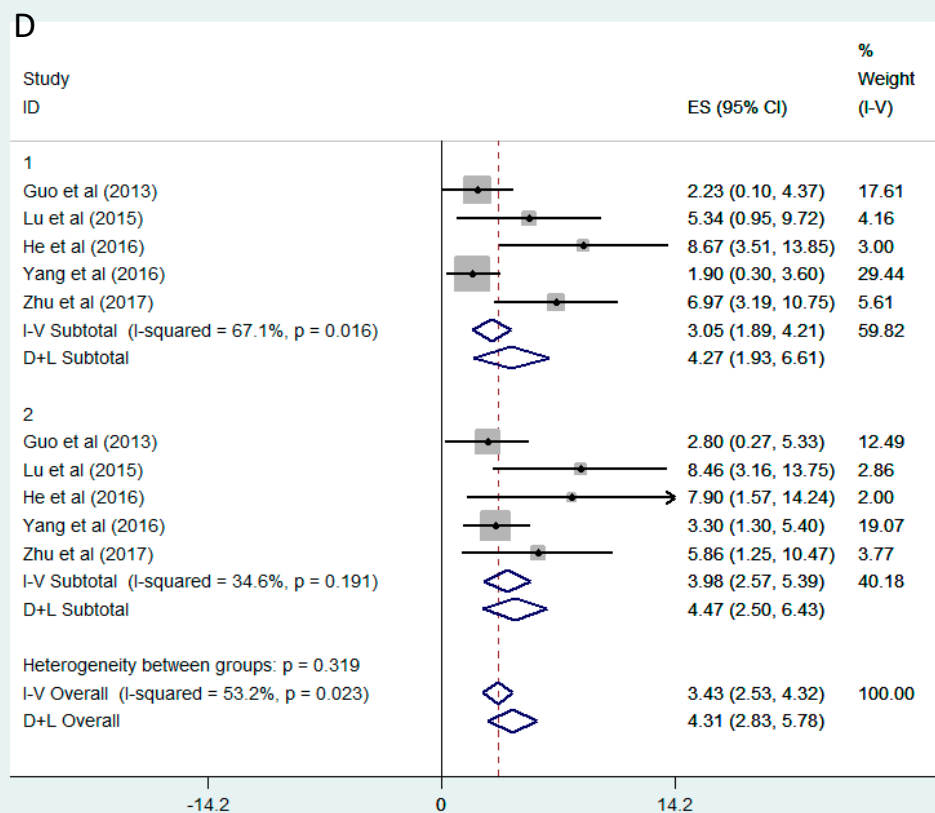

E

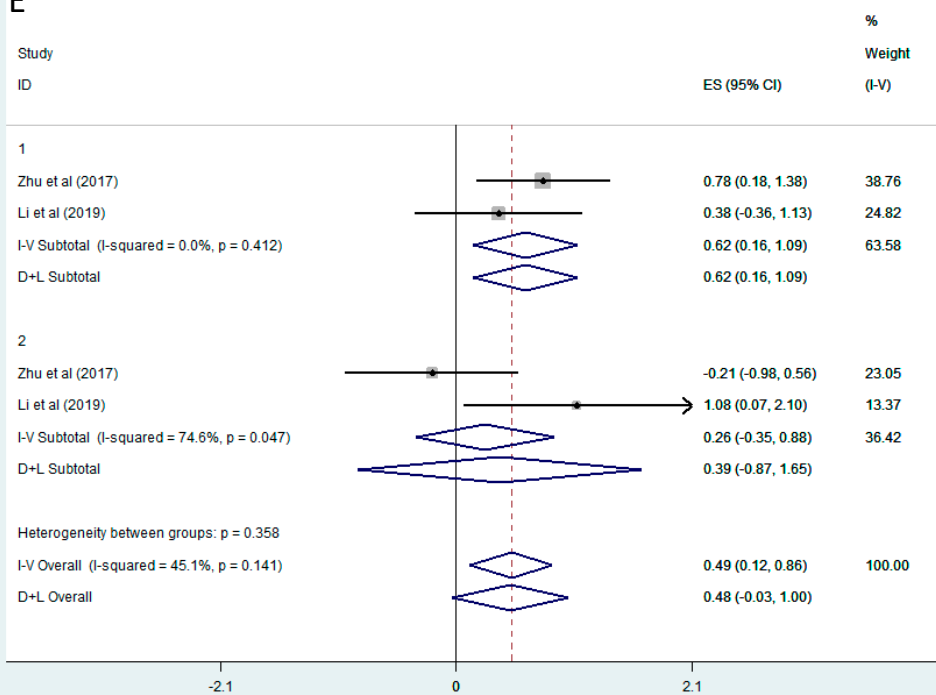

F

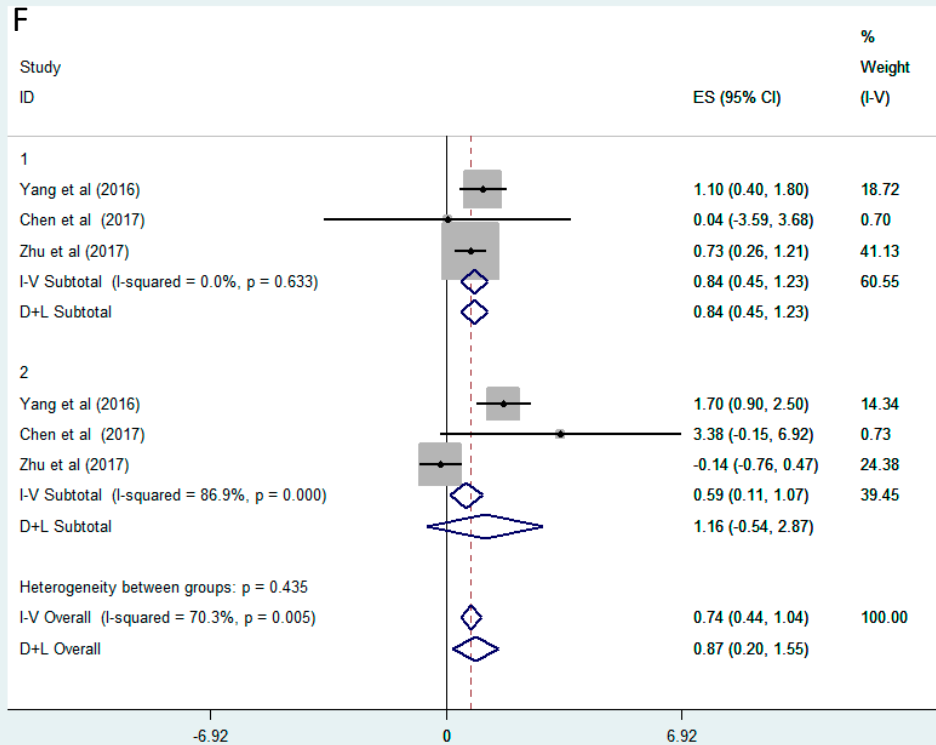

G

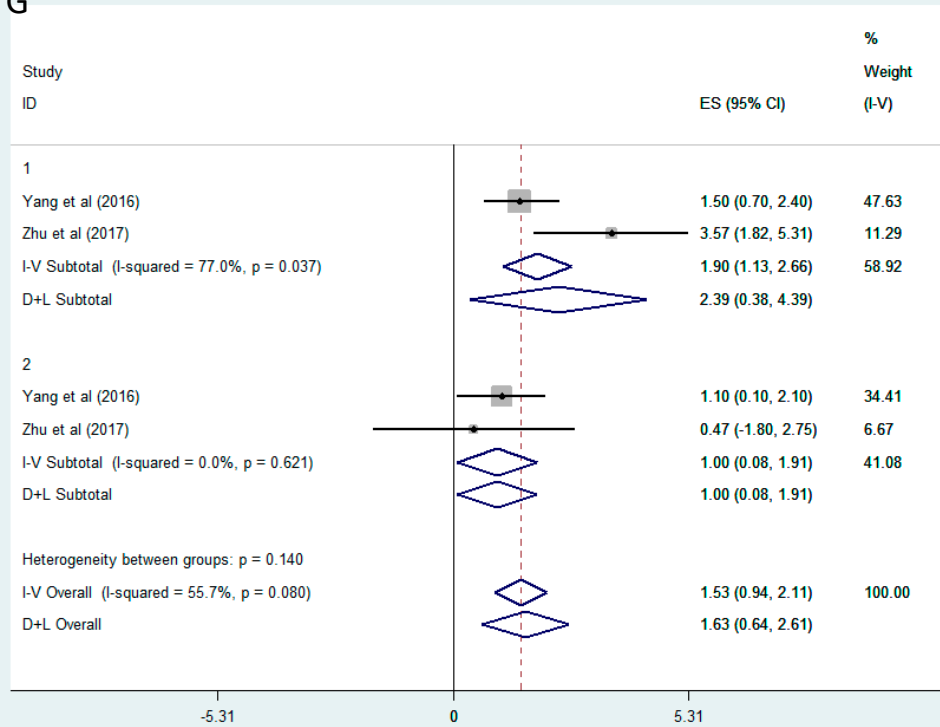

H

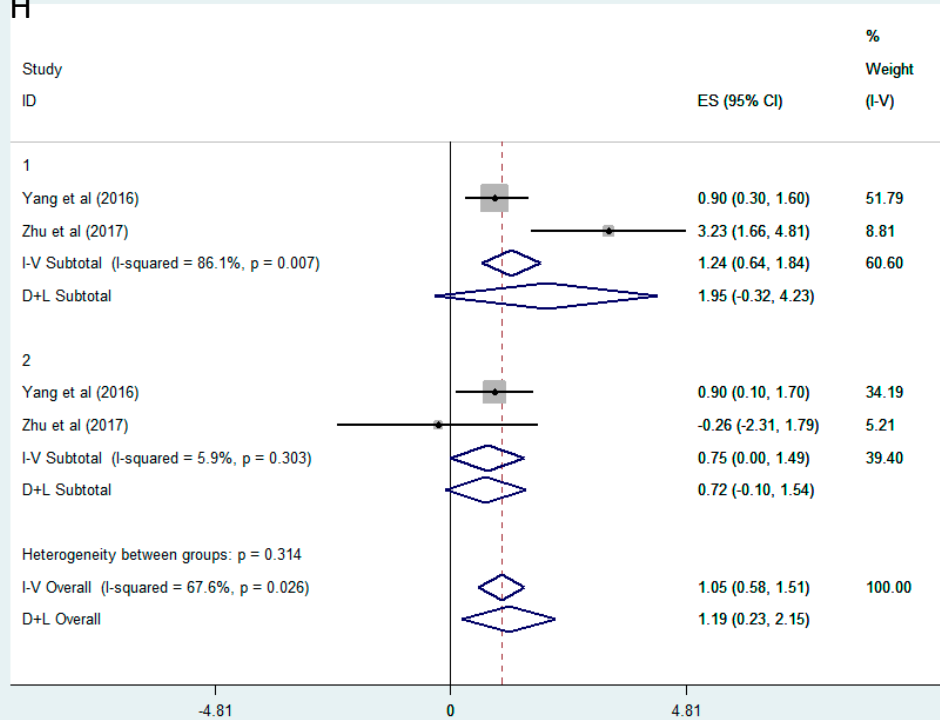

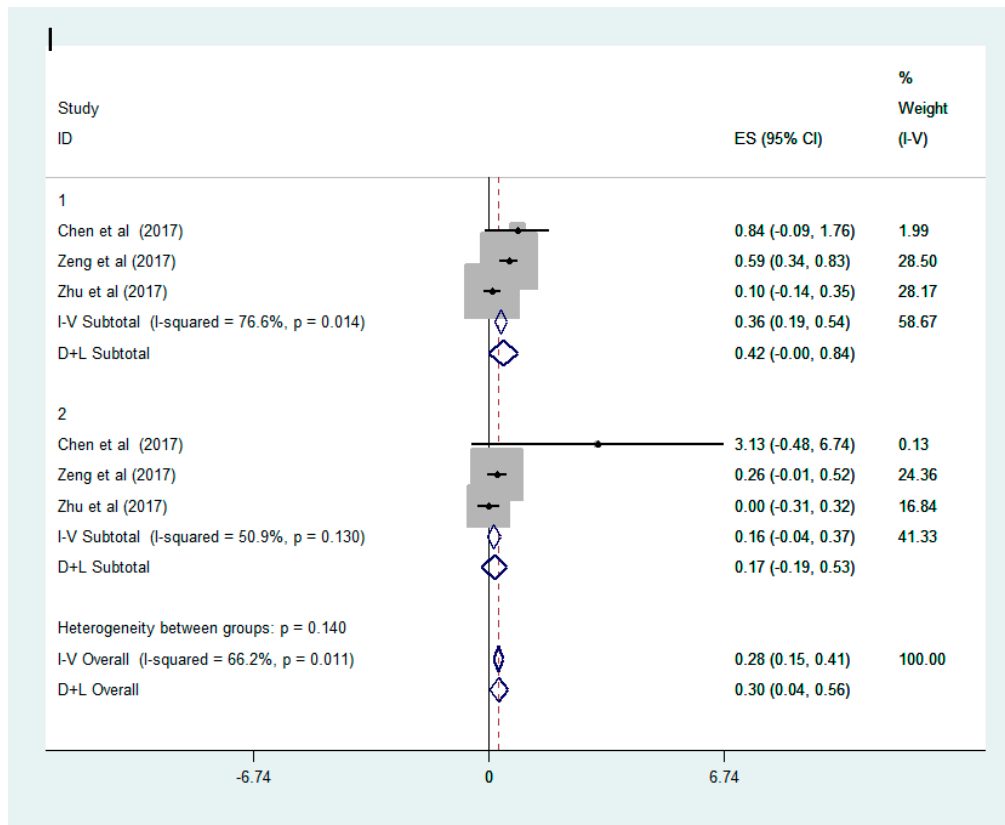

**Figure S7 Forest plot and pooled effect estimates of the ambient air pollution on YLL for non-accidental diseases, cardiovascular disease (CVD) and respiratory disease (RD) stratified by gender. A. PM<sub>2.5</sub> and non-accidental disease; B. PM<sub>10</sub> and non-accidental disease; C. SO<sub>2</sub> and non-accidental disease; D. NO<sub>2</sub> and non-accidental disease; E. PM<sub>2.5</sub> and CVD; F. PM<sub>10</sub> and CVD; G. SO<sub>2</sub> and CVD; H. NO<sub>2</sub> and CVD; I. PM<sub>10</sub> and RD. Group 1: female; group 2: Male.**

A

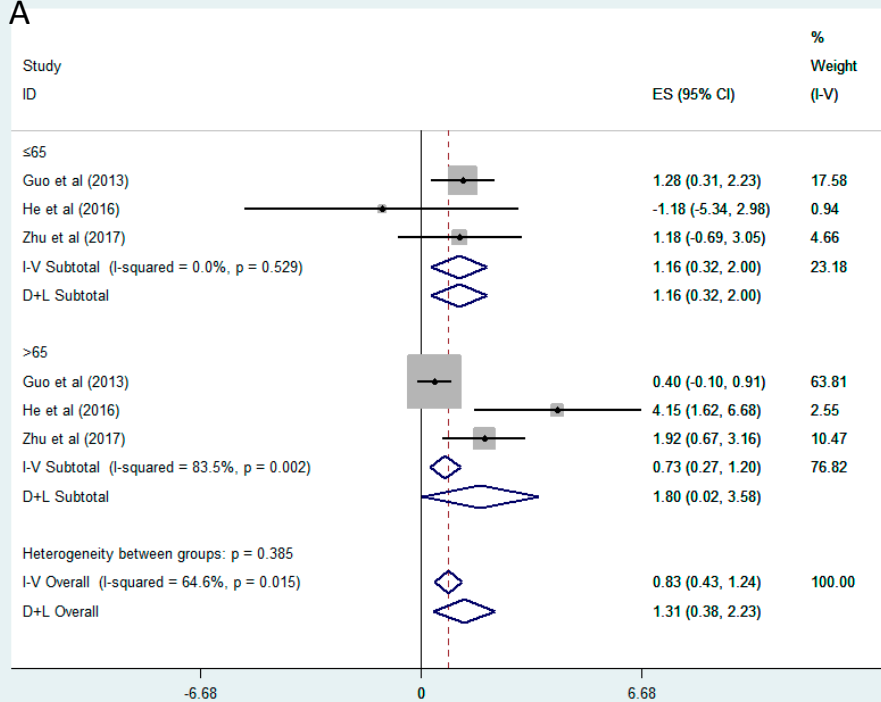

B

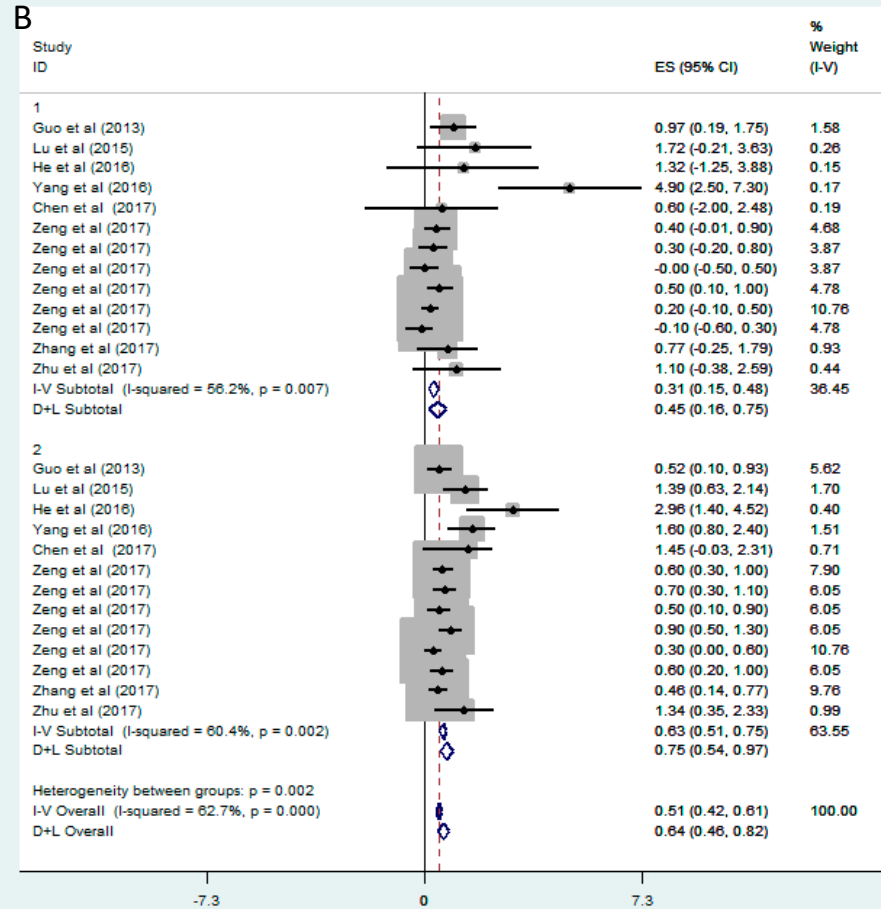

C

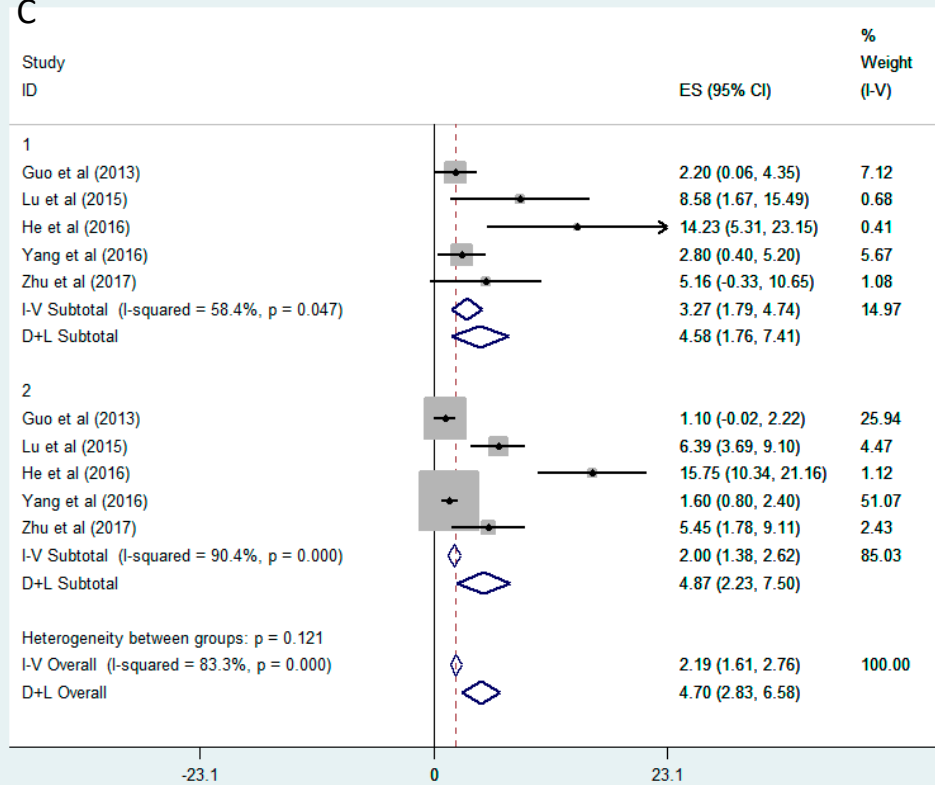

D

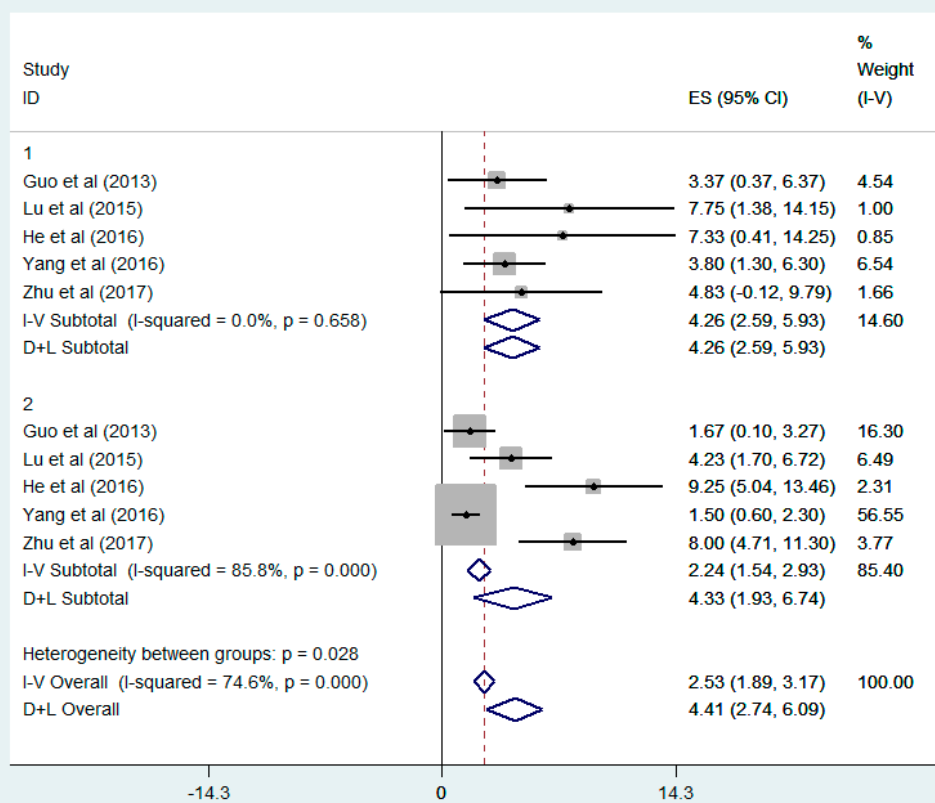

E

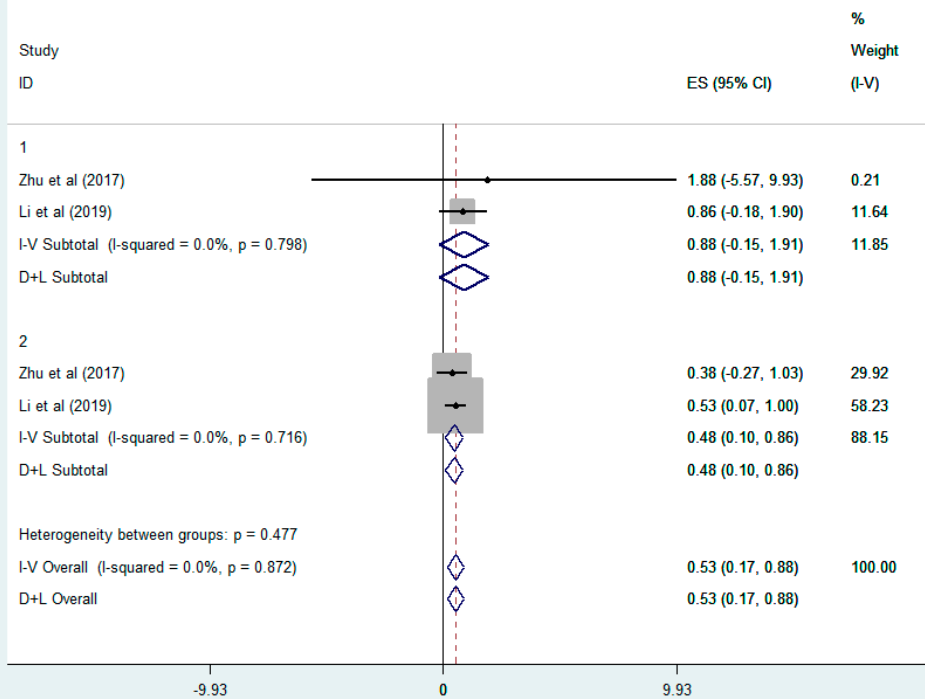

F

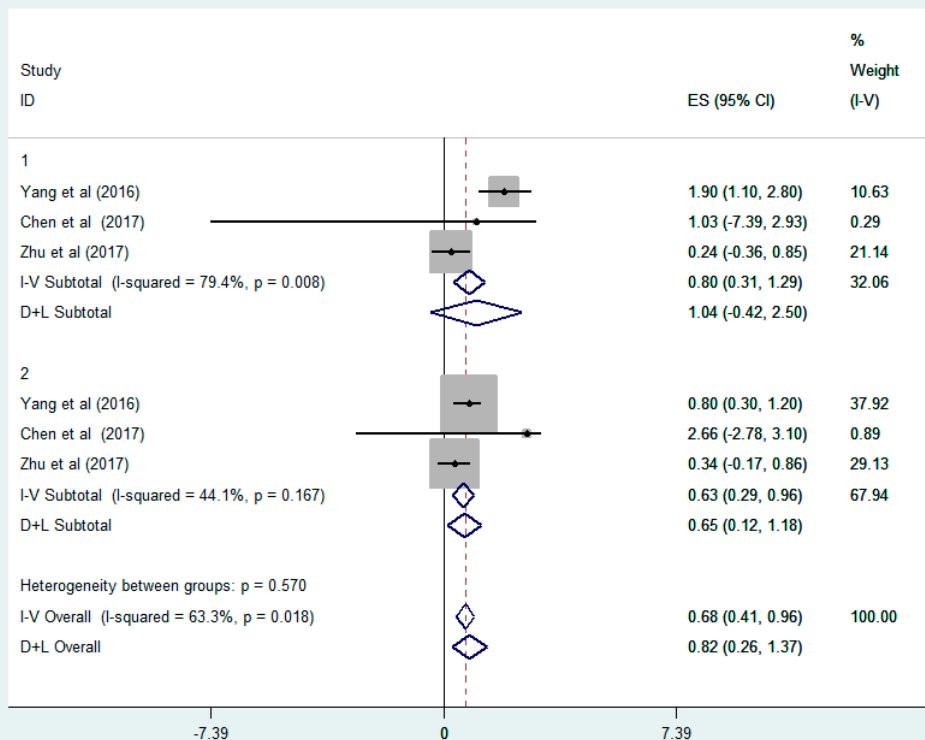

**G**

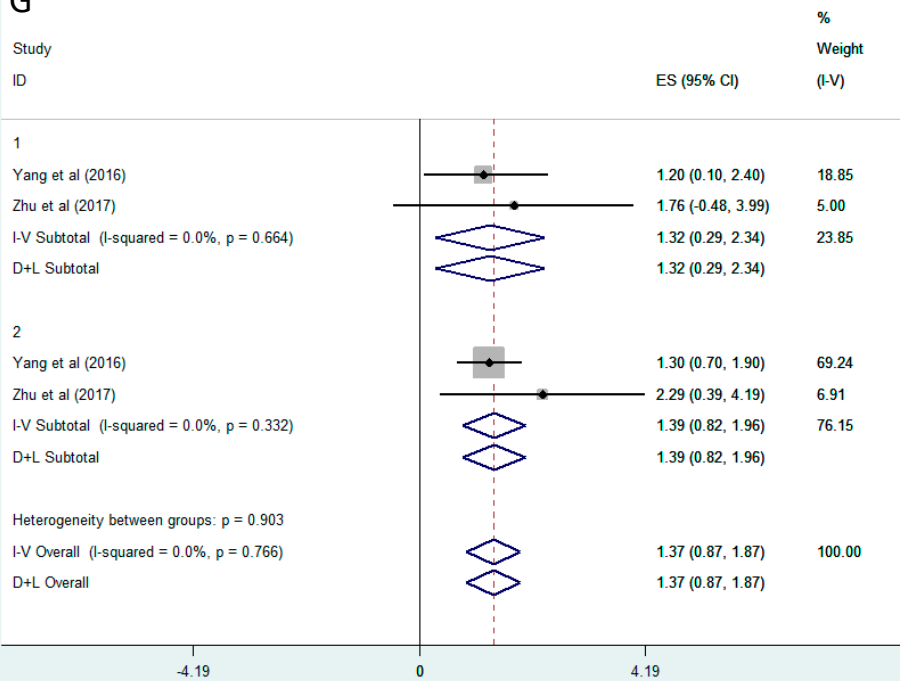

**H**

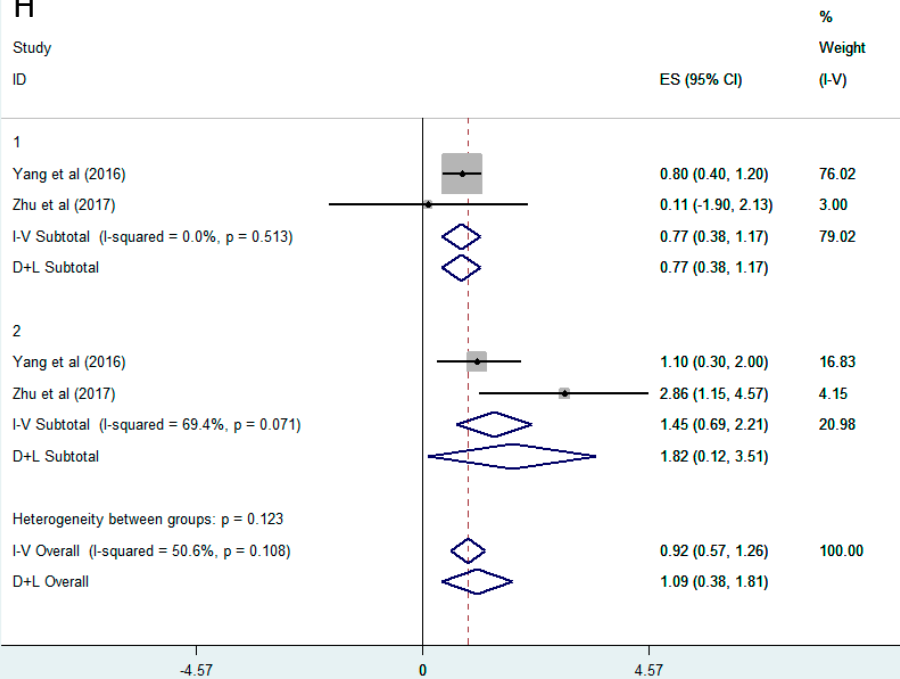

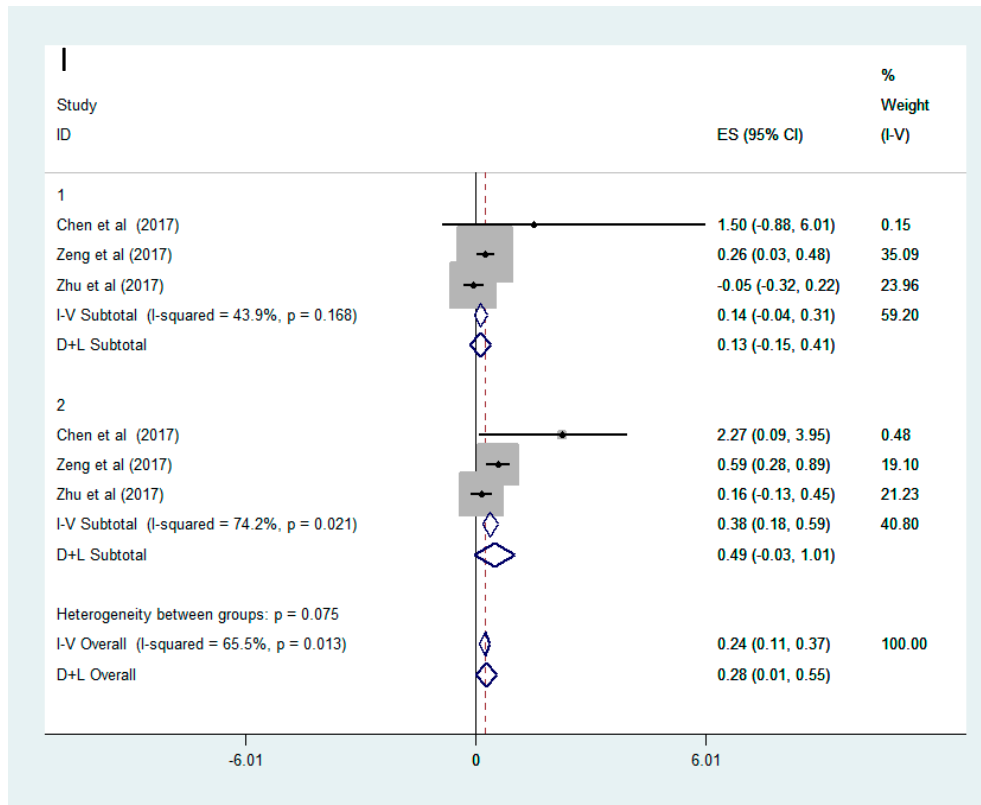

**Figure S8 Forest plot and pooled effect estimates of the ambient air pollution on YLL for non-accidental diseases, cardiovascular disease (CVD) and respiratory disease (RD) stratified by age. A. PM<sub>2.5</sub> and non-accidental disease; B. PM<sub>10</sub> and non-accidental disease; C. SO<sub>2</sub> and non-accidental disease; D. NO<sub>2</sub> and non-accidental disease; E. PM<sub>2.5</sub> and CVD; F. PM<sub>10</sub> and CVD; G. SO<sub>2</sub> and CVD; H. NO<sub>2</sub> and CVD; I. PM<sub>10</sub> and RD. Group 1: younger people; group 2: elder people.**

A

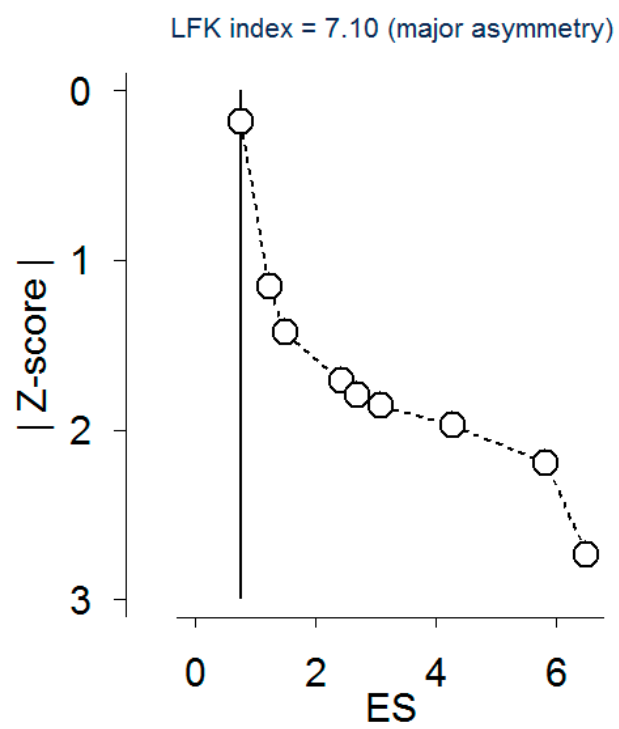

B

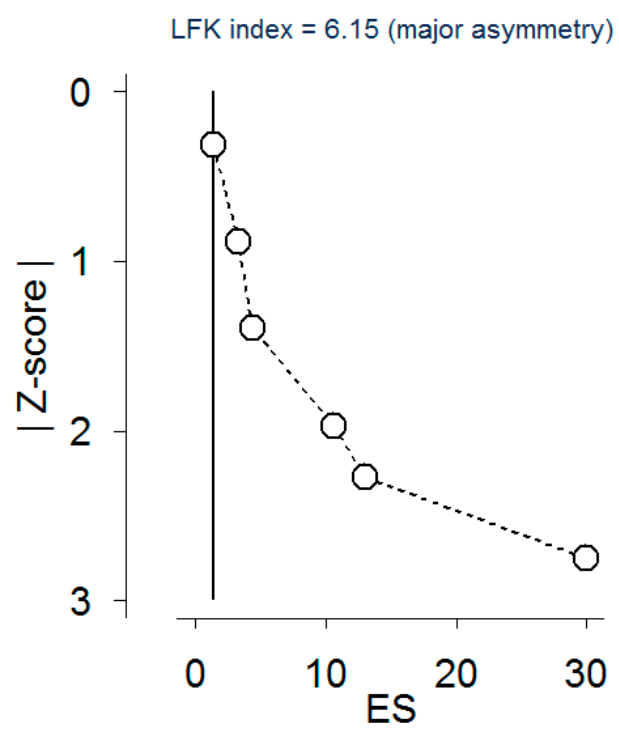

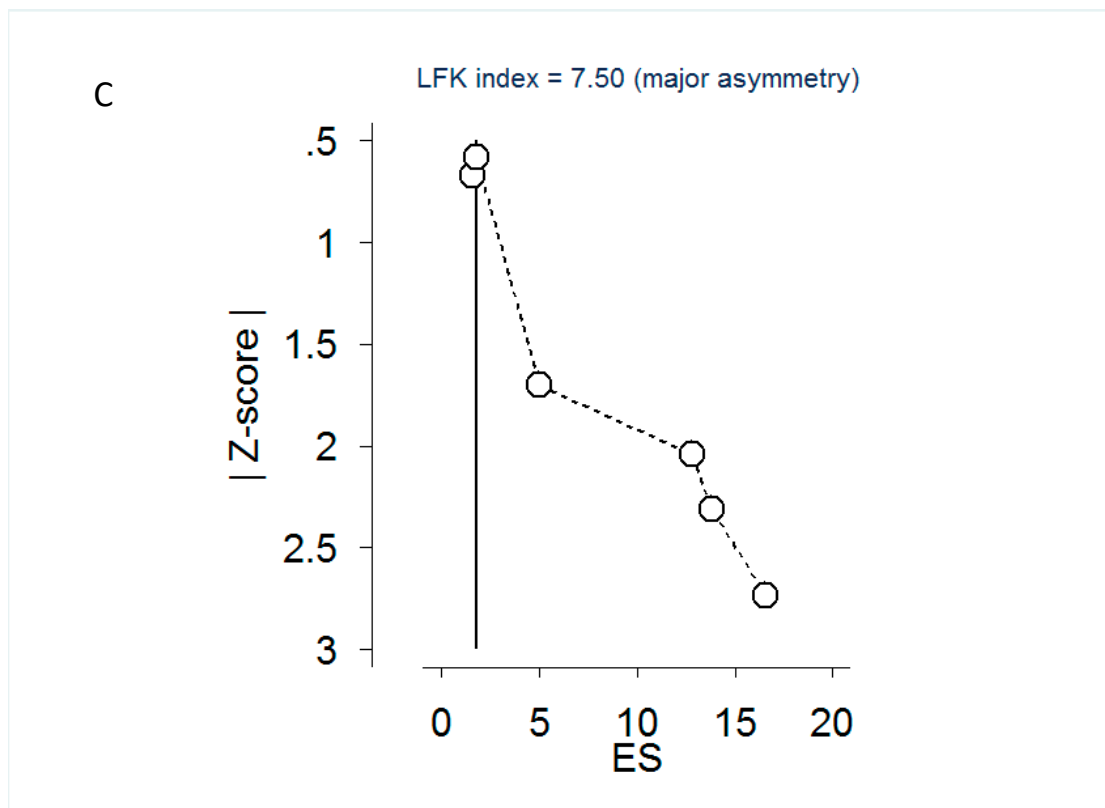

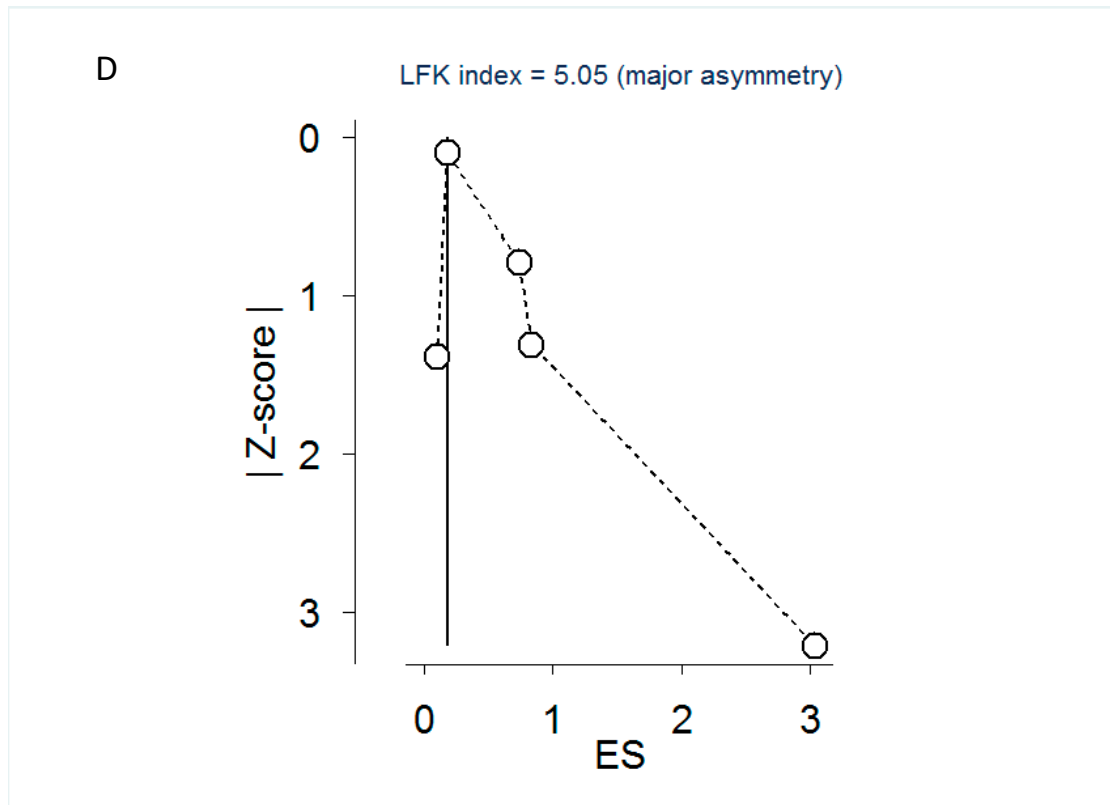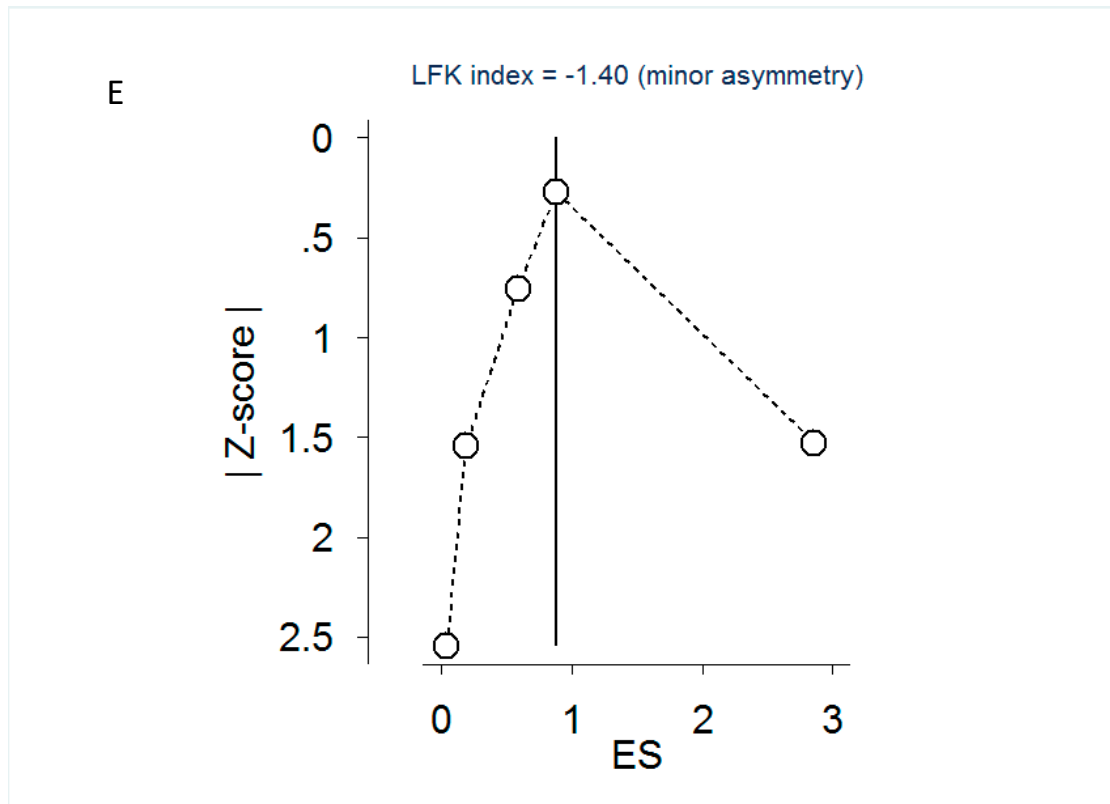

Figure S9 Doi plot and LFK index of the ambient air pollution on the

disease-specific YLL. A. PM<sub>10</sub> and non-accidental diseases; B. SO<sub>2</sub> and non-accidental diseases; C. NO<sub>2</sub> and non-accidental diseases; D. PM<sub>10</sub> and RD; E. PM<sub>10</sub> and CVD.

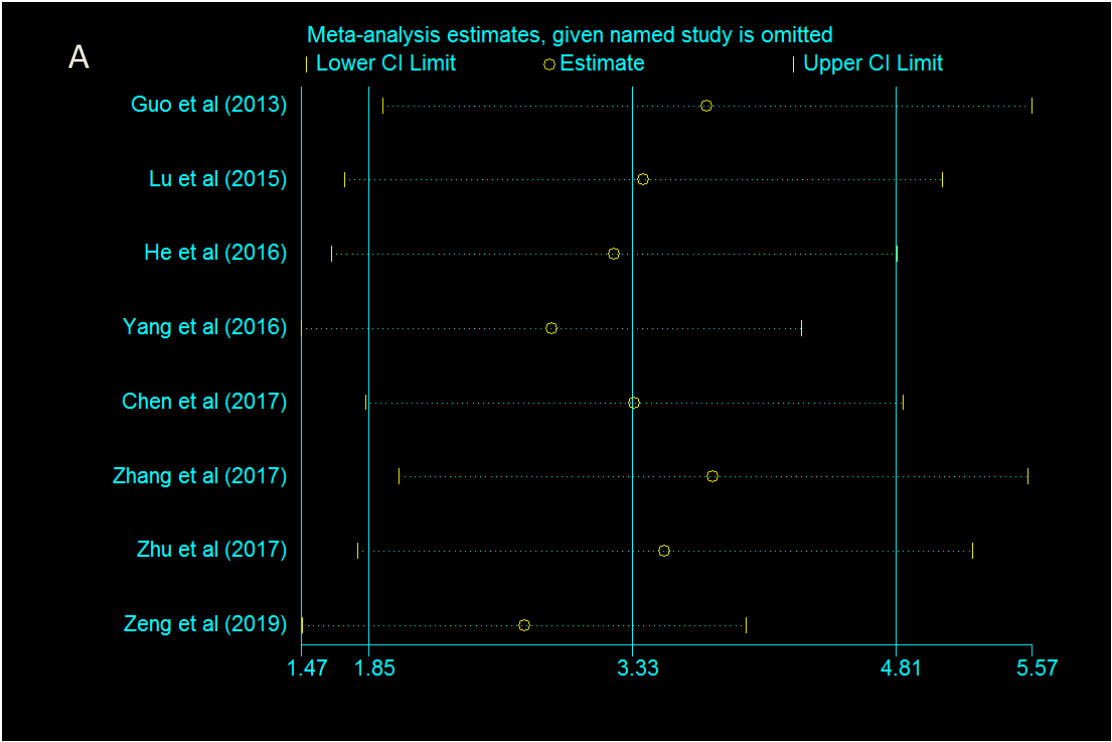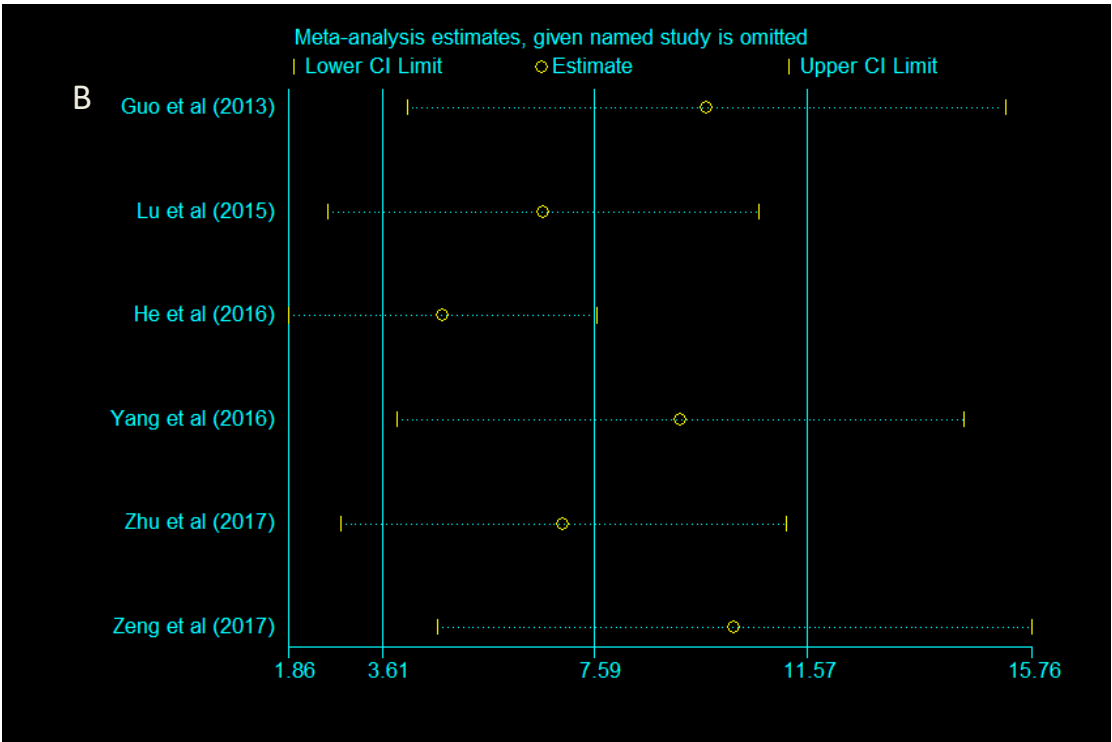

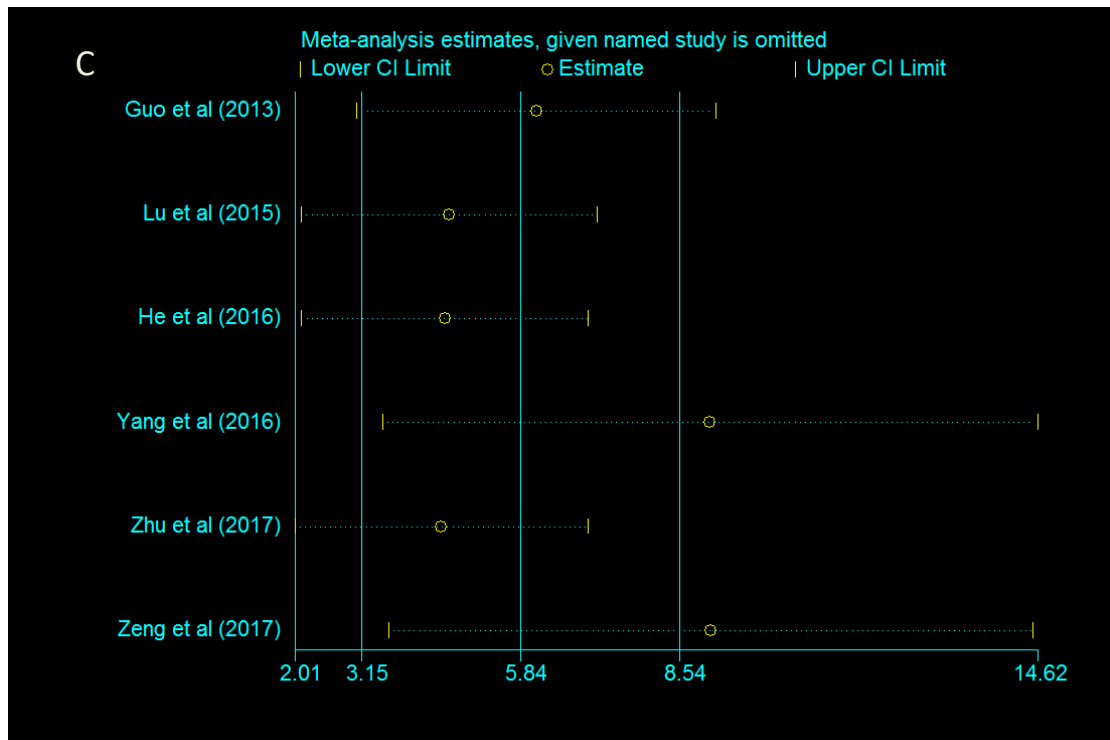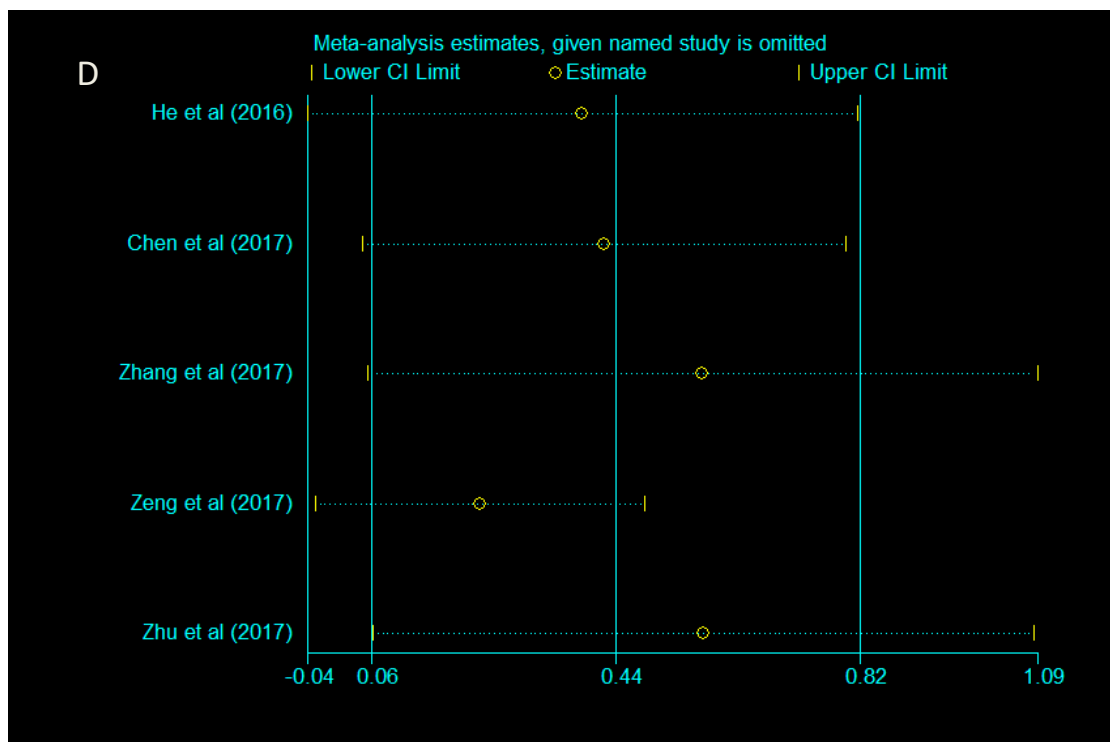

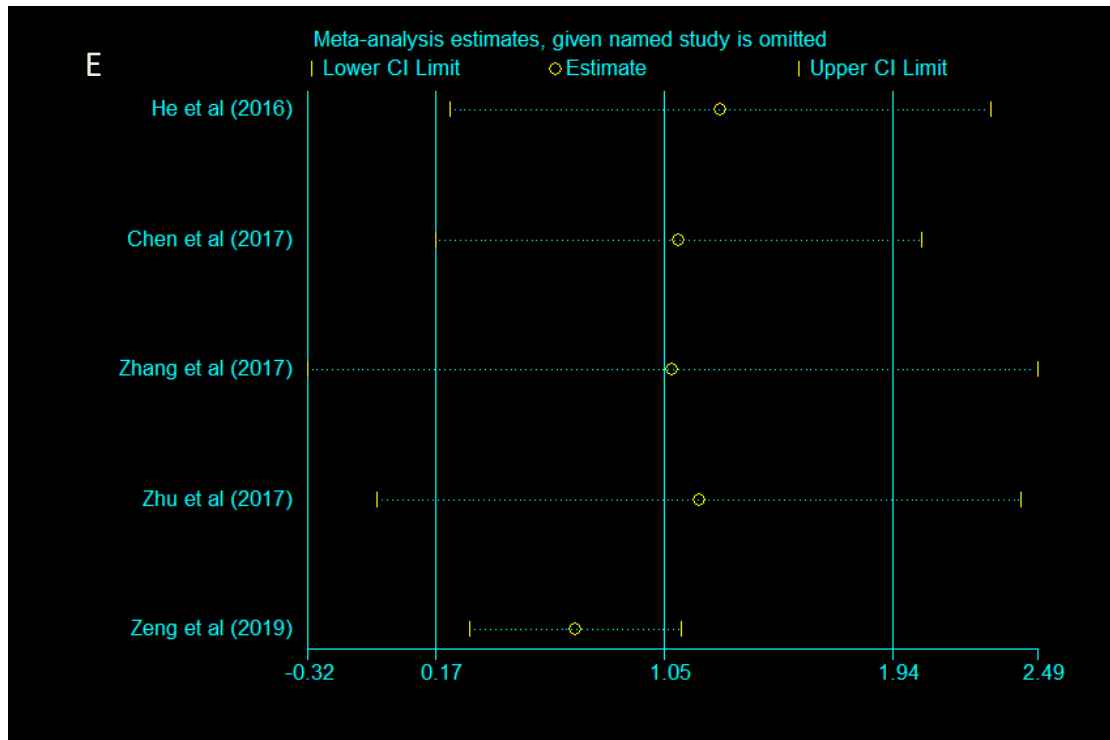

**Figure S10 Sensitivity analyses of the ambient air pollution on the disease-specific YLL. A. PM<sub>10</sub> and non-accidental diseases; B. SO<sub>2</sub> and non-accidental diseases; C. NO<sub>2</sub> and non-accidental diseases; D. PM<sub>10</sub> and RD; E. PM<sub>10</sub> and CVD.**
